# Supplementary material for: Screening of DNA Damage Repair Genes Involved in the Prognosis of Triple-Negative Breast Cancer Patients Based on Bioinformatics
Source: Research Square preprint supplement (doi:10.21203/rs.3.rs-594124/v1), 2021-06-11
Supplement: Supplementary file 1 [file 246bf20abfed150a4a46f4a9.xlsx]

## Sheet: High -risk group GO terms
ID	Description	setSize	enrichmentScore	NES	pvalue	p.adjust	qvalues	rank	leading_edge	core_enrichment
GO_COLLAGEN_CONTAINING_EXTRACELLULAR_MATRIX	GO_COLLAGEN_CONTAINING_EXTRACELLULAR_MATRIX	402	0.455777	2.06417	1e-10	1.46174e-08	1.21922e-08	2141	tags=32%, list=12%, signal=29%	6277/3958/2161/4318/3914/653145/6590/11117/1292/6275/6281/1291/3956/80781/2817/183/51162/7040/1805/302/79148/5654/375790/5549/5155/1294/5919/712/1307/4016/633/3490/348/1512/50509/7045/1634/5054/7041/5118/176/4060/8425/161198/1893/4240/64094/3897/713/6387/4313/131578/64856/6649/1308/710/7076/127435/54507/714/7123/23452/4969/10631/30008/1293/1289/7043/165/27286/81029/150356/977/301/1281/4054/6278/1…
GO_CORNIFICATION	GO_CORNIFICATION	113	0.635039	2.48142	1e-10	1.46174e-08	1.21922e-08	1275	tags=27%, list=7%, signal=26%	3861/3853/1830/3852/3868/5317/3872/3887/6699/43847/1825/3851/3892/3880/286887/3860/3866/3713/5045/5266/23581/6698/11187/823/3856/6704/6700/7051/3848/404203/56603
GO_CYTOSOLIC_RIBOSOME	GO_CYTOSOLIC_RIBOSOME	100	0.629634	2.38807	1e-10	1.46174e-08	1.21922e-08	3125	tags=58%, list=17%, signal=48%	6209/6142/3040/11224/9045/6159/6132/3921/6137/6161/6176/6156/6122/51187/6218/6207/6135/6228/6146/6129/6203/6223/6138/6124/6175/51065/25873/6130/6141/6227/6164/6125/6158/440275/6235/6133/6128/6168/6181/6187/6194/6171/6202/4736/6191/6144/6155/6188/6224/6152/6217/6204/6136/6210/6234/6230/10891/6231
GO_EPIDERMAL_CELL_DIFFERENTIATION	GO_EPIDERMAL_CELL_DIFFERENTIATION	351	0.478184	2.13073	1e-10	1.46174e-08	1.21922e-08	2090	tags=19%, list=11%, signal=17%	3861/3853/1830/3852/3868/360/5317/3872/3887/2810/6699/43847/4488/1825/7538/23764/9314/1513/3851/3892/3880/286887/8796/3860/3866/182/6424/3713/5045/5266/23581/6698/3664/11187/81858/823/3856/6704/6700/135228/84518/7051/3204/427/301/6278/5017/11078/80736/3848/2069/404203/56603/3714/5453/3857/1969/84648/6703/23513/353142/826/1594/388585/861/3280/81537/3891
GO_EPIDERMIS_DEVELOPMENT	GO_EPIDERMIS_DEVELOPMENT	457	0.424573	1.96911	1e-10	1.46174e-08	1.21922e-08	2090	tags=21%, list=11%, signal=19%	3861/3853/1830/3852/3868/360/2709/5317/3872/3887/51806/646/2810/10555/3914/6699/43847/4488/1825/7538/54345/23764/2012/1294/9314/1513/3851/3892/3880/286887/8796/3860/3866/1999/182/6424/3713/5045/5266/23581/6698/9620/1308/3664/11187/81858/823/3856/6704/6700/5154/135228/84518/7051/3204/427/25833/301/6278/6615/5017/11078/80736/3848/2069/10468/3624/404203/8717/56603/1474/3714/5453/80326/3857/3909/3918…
GO_EXTRACELLULAR_STRUCTURE_ORGANIZATION	GO_EXTRACELLULAR_STRUCTURE_ORGANIZATION	360	0.469298	2.11121	1e-10	1.46174e-08	1.21922e-08	2209	tags=34%, list=12%, signal=31%	5268/2621/4318/3914/4322/11117/1292/1291/80781/183/7040/1805/302/79148/5654/375790/5155/1294/1471/4321/1513/1307/4016/857/633/6692/4316/50509/7045/1634/5054/3675/858/176/4060/1999/5045/84171/2303/64094/4313/169611/64856/1308/4320/7076/54507/823/6624/10631/30008/4319/10630/1293/5154/1289/165/7087/8038/8751/3678/150356/682/2113/22801/1281/4323/83700/3689/10266/4921/602/9507/8076/85301/9509/4148/432…
GO_KERATINIZATION	GO_KERATINIZATION	224	0.603021	2.57623	1e-10	1.46174e-08	1.21922e-08	1275	tags=15%, list=7%, signal=14%	3861/3853/1830/3852/3868/5317/3872/3887/2810/6699/43847/1825/3851/3892/3880/286887/3860/3866/3713/5045/5266/23581/6698/11187/81858/823/3856/6704/6700/84518/7051/3848/404203/56603
GO_KERATINOCYTE_DIFFERENTIATION	GO_KERATINOCYTE_DIFFERENTIATION	298	0.521475	2.28482	1e-10	1.46174e-08	1.21922e-08	2090	tags=19%, list=11%, signal=18%	3861/3853/1830/3852/3868/360/5317/3872/3887/2810/6699/43847/4488/1825/7538/1513/3851/3892/3880/286887/8796/3860/3866/182/3713/5045/5266/23581/6698/3664/11187/81858/823/3856/6704/6700/135228/84518/7051/3204/427/301/6278/3848/2069/404203/56603/5453/3857/1969/84648/6703/353142/826/1594/861/81537/3891
GO_KERATIN_FILAMENT	GO_KERATIN_FILAMENT	93	0.699558	2.6344	1e-10	1.46174e-08	1.21922e-08	1149	tags=12%, list=6%, signal=11%	3861/3853/3852/3887/3851/3892/286887/3860/23581/3856/3848
GO_SKIN_DEVELOPMENT	GO_SKIN_DEVELOPMENT	413	0.413488	1.88506	1e-10	1.46174e-08	1.21922e-08	2090	tags=21%, list=11%, signal=19%	3861/3853/1830/3852/3868/360/5317/3872/3887/2707/2810/6699/43847/4488/1825/7538/9076/54345/1513/3851/3892/3880/286887/8796/50509/3675/3860/3866/182/3713/5045/5266/5310/23581/6698/9620/3664/11187/81858/823/3856/6704/6700/5154/135228/1289/84518/7051/3204/427/301/1281/6278/4050/6615/5017/3848/2069/10468/10999/9509/3624/404203/8717/56603/1277/6939/5453/80326/3857/1969/84648/6722/6703/1311/9079/353142…
GO_STRUCTURAL_CONSTITUENT_OF_RIBOSOME	GO_STRUCTURAL_CONSTITUENT_OF_RIBOSOME	157	0.524625	2.13853	4.96364e-10	6.81133e-08	5.68126e-08	4025	tags=55%, list=22%, signal=43%	6209/6142/11224/9045/6159/6132/3921/6137/64981/6161/6176/64975/64951/6156/6122/51187/116541/6218/6207/64432/6135/6228/6146/55052/6129/6203/51116/6223/6138/6124/6175/51065/25873/6130/6141/65993/6227/10240/6164/6125/6182/6158/6235/92259/6133/6128/219927/6168/64963/78988/6181/6187/6194/6171/6202/4736/28998/6191/6144/6155/6188/6224/6152/6217/6204/6136/6210/51073/6234/6230/6231/51264/6183/6157/23521/6…
GO_RIBOSOMAL_SUBUNIT	GO_RIBOSOMAL_SUBUNIT	181	0.484184	1.99818	1.86337e-09	2.23737e-07	1.86617e-07	4025	tags=49%, list=22%, signal=39%	6209/6142/3040/11224/9045/6159/6132/3921/6137/64981/6161/6176/64975/64951/6156/6122/51187/116541/6218/6207/6135/6228/6146/55052/6129/6203/28957/51116/6223/6138/6124/6175/51065/25873/6130/6141/65993/6227/10240/6164/6125/6182/6158/6235/92259/6133/6128/219927/6168/64963/78988/6181/6187/6194/6171/6202/4736/28998/6191/6144/6155/6188/6224/6152/6217/6204/6136/6210/51073/6234/6230/6231/51264/6183/6157/23…
GO_SERINE_TYPE_ENDOPEPTIDASE_INHIBITOR_ACTIVITY	GO_SERINE_TYPE_ENDOPEPTIDASE_INHIBITOR_ACTIVITY	91	0.607209	2.28402	4.16398e-09	4.82734e-07	4.02644e-07	2427	tags=31%, list=13%, signal=27%	5268/144568/6590/183/1294/5055/6692/5054/6695/6318/6317/5045/5274/5266/710/646424/1293/135228/8710/5176/404203/5265/10406/2/149708/51232/27344/5275
GO_LEUKOCYTE_MIGRATION	GO_LEUKOCYTE_MIGRATION	427	0.369094	1.69031	4.61231e-09	5.16887e-07	4.3113e-07	3744	tags=39%, list=20%, signal=31%	57402/3958/2621/4681/9547/4282/11117/2817/7040/79148/5155/1843/414062/6382/6288/9048/5919/7499/7056/857/8764/6348/5054/3675/7070/1893/54209/5880/2995/7424/6361/6366/199/3897/5627/84818/8784/5293/6387/90952/5228/3055/3553/83483/1652/1906/51119/59341/9123/9046/7423/3204/90865/6520/4267/2207/3678/7226/682/6385/1435/301/4323/6278/124976/83700/3689/391/5473/387695/972/6223/6383/3269/7409/1277/5734/564…
GO_REGULATION_OF_LEUKOCYTE_MIGRATION	GO_REGULATION_OF_LEUKOCYTE_MIGRATION	188	0.469369	1.95164	5.46737e-09	6.02665e-07	5.02677e-07	3145	tags=38%, list=17%, signal=32%	57402/3958/2621/4681/9547/4282/11117/79148/1843/5919/7499/8764/6348/5054/7070/1893/54209/5880/7424/6366/199/8784/6387/5228/83483/1652/1906/59341/7423/3204/90865/4267/1435/301/4323/6278/83700/391/387695/972/5734/56477/11035/3383/1240/3569/2155/80024/5724/6351/56833/4345/284114/63940/7124/719/7422/928/10488/6370/975/58494/3673/6793/102/4067/11314/23143/5641/100/3570
GO_INTERMEDIATE_FILAMENT_CYTOSKELETON	GO_INTERMEDIATE_FILAMENT_CYTOSKELETON	236	0.433749	1.8572	1.07619e-08	1.14862e-06	9.58053e-07	1738	tags=13%, list=10%, signal=12%	3861/3853/3852/3868/5317/3872/3887/3851/3892/1674/3880/286887/3860/5339/3866/23581/54512/126917/3856/23336/4000/26119/4323/25900/3848/3692/8829/3857/286077/7431
GO_ESTABLISHMENT_OF_PROTEIN_LOCALIZATION_TO_ENDOPLASMIC_RETICULUM	GO_ESTABLISHMENT_OF_PROTEIN_LOCALIZATION_TO_ENDOPLASMIC_RETICULUM	110	0.544166	2.11852	1.68893e-08	1.74713e-06	1.45726e-06	3125	tags=53%, list=17%, signal=44%	6209/6142/11224/9045/6159/6132/3921/6137/6161/6176/5372/6156/6122/6218/6207/6135/6228/6146/6129/6203/130617/6223/6138/6124/6175/25873/6130/6141/6727/6227/6164/6125/6449/6158/6235/6133/6128/6168/10952/6181/6187/6194/6171/6202/4736/6191/6144/6155/6188/6224/6152/6217/6204/6136/6210/6234/6230/6231
GO_PROTEIN_LOCALIZATION_TO_ENDOPLASMIC_RETICULUM	GO_PROTEIN_LOCALIZATION_TO_ENDOPLASMIC_RETICULUM	134	0.506777	2.00694	2.1175e-08	2.06349e-06	1.72114e-06	3125	tags=47%, list=17%, signal=39%	6209/6142/11224/9045/6159/6132/3921/6137/6161/6176/5372/6156/6122/6218/6207/337867/6135/6228/2901/6146/6129/6203/130617/6223/6138/6124/6175/25873/23645/6130/6141/6727/6227/6164/6125/11079/6449/6158/6235/6133/6128/6168/10952/6181/6187/6194/6171/6202/8733/4736/6191/6144/6155/6188/6224/6152/6217/6204/6136/6210/6234/6230/6231
GO_CELL_SUBSTRATE_JUNCTION	GO_CELL_SUBSTRATE_JUNCTION	406	0.370757	1.6863	2.20368e-08	2.1168e-06	1.7656e-06	2953	tags=35%, list=16%, signal=30%	11135/9351/390/6237/9260/567/126353/10095/1265/857/5159/6209/7408/3675/5339/7041/5328/858/7070/3315/5880/7791/4311/10544/87/3897/1535/11261/3055/2242/5329/1308/2934/6132/2783/79026/4162/823/6176/1948/9902/10174/59341/9564/7106/11170/6156/6122/6218/6207/4267/3678/10395/682/977/6385/22801/301/4323/6278/5605/3689/4921/391/5817/2274/11078/55679/3303/6146/6129/143903/6203/8516/402/2697/6223/6124/6175/…
GO_CYTOKINE_ACTIVITY	GO_CYTOKINE_ACTIVITY	216	0.434343	1.84314	3.08793e-08	2.84428e-06	2.37239e-06	3960	tags=37%, list=22%, signal=29%	9547/4282/7040/414062/374/10673/6348/146433/6361/6366/6387/3553/5008/7076/1906/27190/7043/9235/90865/116173/114900/8744/1435/4050/9518/5473/92304/3625/3624/387695/57152/8742/56477/7476/3569/6367/6351/2056/650/649/6696/7124/1437/7422/392255/654/58191/10637/1440/3589/3606/6370/8600/6368/200081/652/2821/7044/10148/3557/970/10447/7472/2323/3552/6373/6369/353500/9255/7474/112616/5196/8741/7857/656/637…
GO_MYELOID_LEUKOCYTE_MIGRATION	GO_MYELOID_LEUKOCYTE_MIGRATION	199	0.448248	1.89295	4.96967e-08	4.17701e-06	3.484e-06	3960	tags=46%, list=22%, signal=36%	57402/3958/4681/4282/11117/79148/5155/1843/414062/6288/5919/7499/6348/5054/54209/5880/7424/6361/6366/199/84818/5293/6387/5228/3553/1652/1906/59341/7423/4267/2207/1435/301/4323/6278/83700/3689/391/5473/972/6223/3269/7409/5734/5175/3672/1240/4920/3569/6367/6351/56833/4345/2321/9948/719/7422/928/10488/6370/975/57580/8600/6368/566/1113/4067/3557/11314/5641/5800/3570/3552/6373/84522/6369/101/2185/2339…
GO_NEGATIVE_REGULATION_OF_PEPTIDASE_ACTIVITY	GO_NEGATIVE_REGULATION_OF_PEPTIDASE_ACTIVITY	247	0.420975	1.81089	5.9126e-08	4.90819e-06	4.09387e-06	2427	tags=27%, list=13%, signal=24%	5268/2621/1469/2810/4318/653145/144568/6590/183/1294/9314/1471/5055/6692/5973/5054/1893/6695/6318/6317/5045/5274/5266/718/5627/2876/5329/710/7076/358/646424/7079/25824/1293/721/135228/728113/8710/4102/1476/5176/11315/404203/51050/8996/5265/1474/7483/6195/6423/55795/10406/5621/831/4035/2/4803/149708/140870/3082/56925/221476/7422/720/51232/27344/5275
GO_CELL_CHEMOTAXIS	GO_CELL_CHEMOTAXIS	287	0.40248	1.76048	6.11566e-08	5.01484e-06	4.18283e-06	3960	tags=43%, list=22%, signal=34%	57402/3958/2621/4681/9547/4282/79148/5155/1843/414062/6288/5919/5159/3164/57007/6348/5054/6289/3315/5880/7424/6361/6366/64094/199/84818/5293/6387/5228/3553/1652/1906/51119/59341/9564/7423/1839/2207/7226/1435/301/6278/83700/3689/391/5473/2950/2246/387695/972/6223/5580/3269/8829/7409/56477/57449/3672/1240/1969/9023/1673/3569/6367/2155/80024/6351/56833/2321/284114/9034/63940/2867/3082/719/7422/2826/…
GO_EXTRACELLULAR_MATRIX_STRUCTURAL_CONSTITUENT	GO_EXTRACELLULAR_MATRIX_STRUCTURAL_CONSTITUENT	162	0.470654	1.91595	7.20776e-08	5.83036e-06	4.86305e-06	2964	tags=41%, list=16%, signal=35%	3914/11117/1292/1291/80781/1805/375790/5549/1294/1307/633/3490/50509/7045/1634/5118/176/4060/8425/1893/4240/64856/1308/127435/4969/10631/30008/1293/1289/165/27286/150356/1281/64129/8076/85301/4148/1116/54829/4239/3913/1277/3909/4053/3918/2199/169044/1296/10418/1311/8406/7450/1278/1404/79812/84034/1300/22795/25878/79875/920/2200/1301/1306/10875/78987/4811
GO_COLLAGEN_METABOLIC_PROCESS	GO_COLLAGEN_METABOLIC_PROCESS	102	0.554816	2.10416	8.66868e-08	6.7777e-06	5.65321e-06	2813	tags=51%, list=15%, signal=43%	4318/4322/11117/7040/79148/1471/4321/1513/5653/5159/4316/114757/5045/4313/4320/10536/9902/4319/57333/1289/7043/8751/4323/1508/8710/55323/3397/9509/4326/4327/1509/4239/1277/2191/64386/90993/85007/7431/140766/3569/28984/2149/1278/2022/4314/54361/642658/4261/4312/3673/652/1306
GO_COLLAGEN_CATABOLIC_PROCESS	GO_COLLAGEN_CATABOLIC_PROCESS	45	0.70498	2.35918	1.30109e-07	9.50925e-06	7.93157e-06	2097	tags=56%, list=11%, signal=49%	4318/4322/79148/1471/4321/1513/5653/4316/5045/4313/4320/9902/4319/8751/4323/1508/9509/4326/4327/1509/2191/64386/85007/140766/4314
GO_COTRANSLATIONAL_PROTEIN_TARGETING_TO_MEMBRANE	GO_COTRANSLATIONAL_PROTEIN_TARGETING_TO_MEMBRANE	98	0.549626	2.06932	1.3426e-07	9.70714e-06	8.09663e-06	3125	tags=57%, list=17%, signal=48%	6209/6142/11224/9045/6159/6132/3921/6137/6161/6176/6156/6122/6218/6207/6135/6228/6146/6129/6203/130617/6223/6138/6124/6175/25873/6130/6141/6727/6227/6164/6125/6158/6235/6133/6128/6168/10952/6181/6187/6194/6171/6202/4736/6191/6144/6155/6188/6224/6152/6217/6204/6136/6210/6234/6230/6231
GO_ENDOPEPTIDASE_REGULATOR_ACTIVITY	GO_ENDOPEPTIDASE_REGULATOR_ACTIVITY	180	0.448362	1.85387	1.6006e-07	1.13289e-05	9.44932e-06	2427	tags=27%, list=13%, signal=23%	5268/2621/1469/144568/6590/183/1294/1471/5055/6692/5973/5054/6695/6318/6317/5045/5274/5266/718/5627/710/7076/646424/7079/25824/1293/721/135228/8710/1476/5176/404203/8996/5265/1474/6195/6423/10406/5621/831/2/4803/149708/56925/720/51232/27344/5275
GO_PEPTIDASE_REGULATOR_ACTIVITY	GO_PEPTIDASE_REGULATOR_ACTIVITY	215	0.424652	1.80001	1.66012e-07	1.16278e-05	9.6986e-06	2427	tags=27%, list=13%, signal=23%	5268/2621/1469/144568/6590/183/1294/1471/5055/857/6692/1512/5973/5054/5118/6695/6318/6317/5045/5274/5266/718/5627/710/7076/572/646424/7079/25824/1293/721/135228/8710/1476/5176/404203/51050/8996/5265/1474/6195/6423/65018/51065/10406/22861/5621/831/2/4803/149708/56925/221476/720/51232/27344/5275
GO_TISSUE_MIGRATION	GO_TISSUE_MIGRATION	278	0.39814	1.74441	1.694e-07	1.16501e-05	9.71725e-06	1766	tags=25%, list=10%, signal=23%	3868/6273/6286/4318/54345/183/7040/59/5155/9314/8828/3373/348/1512/3164/1634/3675/7041/80005/9982/10519/161198/3315/7424/2303/64094/29775/2876/5797/3725/10755/54567/1906/6915/54566/1948/9564/72/4846/27286/94/9647/1839/5728/2113/301/3689/340719/5176/3397/306/23129/2246/80149/11156/8742/5646/10000/8829/2191/284/9922/57449/57381/5175/7476/4627/1969/6722
GO_COLLAGEN_BINDING	GO_COLLAGEN_BINDING	67	0.617686	2.21395	2.14181e-07	1.4259e-05	1.18933e-05	1963	tags=46%, list=11%, signal=41%	4318/4322/1292/1291/5155/4321/1513/4092/50509/7045/1634/3675/5118/4060/6695/131578/127435/9902/5154/165/150356/22801/1508/4921/54829/8404/84168/3672/285613/1311/7450
GO_CELL_SUBSTRATE_ADHESION	GO_CELL_SUBSTRATE_ADHESION	335	0.370319	1.64478	4.3798e-07	2.83171e-05	2.3619e-05	3189	tags=34%, list=17%, signal=28%	10232/2621/27076/3914/11117/6281/3956/4321/1307/29984/50509/5054/3675/7041/5328/80005/91663/7070/10519/182/6695/5880/7791/2633/6366/87/64094/3897/5310/1613/1308/51330/83706/10631/10174/10630/11170/94/9647/3204/8751/5728/604/3678/10395/6385/22801/1435/1281/4323/83700/3689/11078/55679/3397/8516/402/4091/10319/3913/8829/1277/56477/284/5175/84168/9341/123720/6548/3672/2199/2316/947/3693/6722/285613/4…
GO_REGULATION_OF_PEPTIDASE_ACTIVITY	GO_REGULATION_OF_PEPTIDASE_ACTIVITY	423	0.343541	1.57137	5.08559e-07	3.22599e-05	2.69077e-05	2279	tags=24%, list=12%, signal=21%	5268/2621/1469/2810/4318/653145/144568/6590/183/6300/1294/9314/1471/5055/857/6692/1512/5973/5054/5118/1893/6695/6318/6317/5045/5274/5266/718/5627/2876/23581/5329/710/2934/7076/5696/358/4609/572/646424/5698/7079/25824/51024/1293/721/57333/135228/4155/9647/10395/728113/8710/3297/79594/4102/1476/5176/11315/404203/51050/8996/8915/8717/1509/5265/1474/5371/83874/26355/7483/6195/6423/65018/1944/51065/94…
GO_CYTOSOLIC_LARGE_RIBOSOMAL_SUBUNIT	GO_CYTOSOLIC_LARGE_RIBOSOMAL_SUBUNIT	55	0.641798	2.23248	5.45752e-07	3.42957e-05	2.86057e-05	4025	tags=73%, list=22%, signal=57%	6142/11224/9045/6159/6132/6137/6161/6176/6156/6122/51187/6135/6146/6129/6138/6124/6175/25873/6130/6141/6164/6125/6158/6133/6128/6168/6181/6171/4736/6144/6155/6152/6136/6157/23521/6166/6134/7311/140801/6139
GO_POSITIVE_CHEMOTAXIS	GO_POSITIVE_CHEMOTAXIS	66	0.603562	2.16083	5.52695e-07	3.44104e-05	2.87013e-05	3189	tags=45%, list=17%, signal=38%	3958/4282/5155/6288/9048/6348/6289/7424/64221/6387/5228/7423/8829/284/4035/1673/2155/23513/3082/7422/10457/3791/2152/566/1901/3673/652/2252/9037/11151
GO_ENDOTHELIAL_CELL_MIGRATION	GO_ENDOTHELIAL_CELL_MIGRATION	192	0.431221	1.80353	5.75242e-07	3.48462e-05	2.90648e-05	1766	tags=29%, list=10%, signal=26%	6273/6286/54345/183/7040/5155/9314/8828/348/3164/1634/7041/9982/10519/161198/3315/7424/2303/64094/29775/2876/5797/10755/54567/1906/6915/1948/9564/4846/27286/94/5728/2113/301/3689/5176/3397/306/23129/2246/80149/11156/8742/5646/10000/8829/2191/284/57449/57381/5175/7476/4627/1969/6722
GO_RESPIRASOME	GO_RESPIRASOME	82	0.571022	2.09972	6.08952e-07	3.63155e-05	3.02904e-05	3895	tags=52%, list=21%, signal=41%	1346/84419/1537/84701/56901/1351/374291/192286/4715/10975/4713/51103/790955/1327/7384/170712/6390/4723/4700/7381/1347/1349/51079/1340/29796/4712/1337/6834/4728/4716/126328/4724/7386/4702/4729/25994/4726/9377/4708/4706/27089/4695/4707
GO_LEUKOCYTE_CHEMOTAXIS	GO_LEUKOCYTE_CHEMOTAXIS	213	0.405798	1.72186	1.23616e-06	7.10423e-05	5.92557e-05	3960	tags=43%, list=22%, signal=34%	57402/3958/2621/4681/9547/4282/79148/5155/1843/414062/6288/5919/6348/5054/5880/7424/6361/6366/199/84818/5293/6387/5228/3553/1652/1906/51119/59341/7423/2207/7226/1435/301/6278/83700/3689/5473/387695/972/6223/3269/7409/3672/1240/9023/3569/6367/2155/80024/6351/56833/2321/284114/63940/2867/719/7422/10488/58191/6370/57580/8600/6368/566/1901/1113/102/4067/3557/5641/5800/3570/11151/3552/6373/6369/101/28…
GO_RESPONSE_TO_INTERFERON_GAMMA	GO_RESPONSE_TO_INTERFERON_GAMMA	191	0.421648	1.76286	1.3887e-06	7.84637e-05	6.54458e-05	2838	tags=32%, list=16%, signal=28%	4502/445/9076/414062/567/2635/3134/6348/2634/7791/2633/6361/6366/3115/199/3055/1613/10410/2934/3664/3123/1906/3133/115362/3119/55647/3135/115361/163351/3659/5371/5580/3117/65010/84166/10581/3383/9341/7454/7431/6367/965/5724/6351/1594/3122/10537/2209/3113/6813/3594/58191/3663/8519/6370/3665/4261/3127/10437/6368/4641/3394
GO_CELL_JUNCTION_ORGANIZATION	GO_CELL_JUNCTION_ORGANIZATION	283	0.377115	1.65356	1.42779e-06	7.93429e-05	6.61791e-05	2788	tags=33%, list=15%, signal=28%	3861/3852/5317/3914/6591/6281/9076/80139/183/7040/2706/3801/1307/857/29984/4092/7122/2701/7408/5339/10804/389/7070/87/90952/1613/1308/3553/11187/6624/57863/59341/11170/23136/7043/1436/94/9647/5728/3678/10395/977/6385/4323/6615/83700/10266/5817/55679/402/283/2697/8829/9922/5175/3909/123720/6548/3918/1969/2316/6722/1009/4035/7205/2017/2149/2042/861/51599/1002/395/9948/7124/7422/2318/1445/3791/54361…
GO_CELL_JUNCTION_ASSEMBLY	GO_CELL_JUNCTION_ASSEMBLY	241	0.394238	1.69294	1.61541e-06	8.75968e-05	7.30636e-05	2788	tags=33%, list=15%, signal=28%	3861/3852/5317/3914/6591/6281/9076/80139/183/2706/1307/857/29984/4092/7122/2701/7408/5339/10804/389/7070/87/90952/1613/1308/3553/11187/6624/59341/11170/23136/94/9647/5728/3678/10395/977/6385/4323/6615/83700/10266/55679/402/2697/8829/5175/3909/123720/6548/3918/1969/2316/6722/1009/4035/7205/2017/2042/861/51599/1002/395/9948/7124/7422/2318/3791/54361/928/10015/1010/2702/151306/2705/79778/342184/4641…
GO_CONNECTIVE_TISSUE_DEVELOPMENT	GO_CONNECTIVE_TISSUE_DEVELOPMENT	259	0.38461	1.6739	2.03022e-06	0.00010665	8.89555e-05	2401	tags=31%, list=13%, signal=27%	6591/4322/4488/1292/1291/7040/302/59/5155/1294/116039/3373/1513/633/5307/5159/7045/176/4060/1893/2303/130497/5310/2101/64856/7076/4487/4094/10736/5396/1906/6097/59341/1293/1289/94/864/81029/150356/1435/4054/6615/8710/91252/85301/4148/1116/1958/9241/30812/2297/7483/6423/7477/1277/3202/6474/7476/5744/51738/947/4920/6722/1311/1396/85477/8372/388585/861/650/649/8092/5915/50515/5916/392255/654/642658/…
GO_NEGATIVE_REGULATION_OF_PROTEOLYSIS	GO_NEGATIVE_REGULATION_OF_PROTEOLYSIS	339	0.353519	1.56955	2.20356e-06	0.000113842	9.49545e-05	2363	tags=23%, list=13%, signal=20%	5268/2621/1469/2810/4318/55450/653145/144568/6590/183/1294/9314/1471/5055/6692/5973/5054/79094/1893/6695/6318/6317/5045/5274/5266/718/5627/2619/2876/5329/710/7076/358/646424/10755/7079/25824/1293/721/135228/337867/6135/728113/8710/4102/210/7850/1476/5176/11315/404203/51050/8996/5265/1474/5371/7483/6195/6423/55795/10406/5621/831/6125/4035/6449/2/4803/149708/140870/3082/56925/221476/7422/720/2055/5…
GO_RESPIRATORY_CHAIN_COMPLEX	GO_RESPIRATORY_CHAIN_COMPLEX	70	0.583484	2.10496	2.21792e-06	0.000113842	9.49545e-05	4039	tags=54%, list=22%, signal=42%	84419/1537/84701/56901/1351/374291/4715/4713/51103/790955/1327/7384/170712/6390/4723/4700/7381/1349/51079/1340/29796/4712/1337/4728/4716/126328/4724/7386/4702/4729/4726/9377/4708/4706/27089/4695/4707/7385
GO_RESPONSE_TO_MOLECULE_OF_BACTERIAL_ORIGIN	GO_RESPONSE_TO_MOLECULE_OF_BACTERIAL_ORIGIN	337	0.356332	1.57689	2.38774e-06	0.00012163	0.00010145	3921	tags=36%, list=21%, signal=29%	57402/3726/3934/706/4282/54/6590/7538/445/2353/249/9076/7040/2706/7056/4016/6348/1634/5054/10804/10417/54209/23643/3055/3553/3725/1906/2687/6915/7079/721/4846/6278/9450/929/3297/5179/210/5473/2950/133/80149/8915/1312/2697/2326/4091/7054/3620/5734/3383/57817/79155/5739/55970/7431/284297/3569/5724/1594/2056/51510/2149/29126/7124/558/1437/2796/3656/59307/654/148022/942/1440/3663/84868/3606/4258/1511…
GO_ENDOPLASMIC_RETICULUM_LUMEN	GO_ENDOPLASMIC_RETICULUM_LUMEN	299	0.366376	1.60331	2.86546e-06	0.000141672	0.000118167	2830	tags=31%, list=15%, signal=26%	10232/2621/7475/54587/1292/1291/3956/80781/5155/1294/1471/567/8614/1307/5799/3490/348/50509/718/4240/410/56975/64856/5329/1308/7076/54507/1906/84141/1293/5154/57333/1289/1066/81029/285203/1435/1281/5179/85301/51148/283208/2159/4148/2098/7425/5265/54863/2326/79188/6383/8404/10098/7477/3913/10491/1277/1114/3486/8542/7476/10272/51738/169044/1296/10418/213/3569/2155/2923/1278/340075/8635/60681/6696/3…
GO_REGULATION_OF_BODY_FLUID_LEVELS	GO_REGULATION_OF_BODY_FLUID_LEVELS	483	0.32164	1.48051	3.06193e-06	0.000149192	0.000124439	3214	tags=28%, list=18%, signal=24%	3868/360/10398/2621/2810/2161/653145/9076/23764/302/5155/6288/5055/7056/595/857/348/3043/4883/5054/5328/3315/10544/5627/1535/30846/2769/5329/710/832/5029/358/83706/2151/25946/1906/6915/187/10630/59341/5154/4846/2767/525/2207/1281/1056/3848/5873/2159/133/1036/5265/56603/3659/2697/4645/5580/10938/7409/1277/2191/353/7975/23348/5066/6340/4627/7454/2316/196883/108/947/5890/6722/5592/1311/51763/3569/10…
GO_GROWTH_FACTOR_ACTIVITY	GO_GROWTH_FACTOR_ACTIVITY	155	0.437883	1.77497	3.22239e-06	0.00015588	0.000130018	2909	tags=33%, list=16%, signal=28%	1890/6320/183/7040/5155/9048/374/182/146433/7424/6387/5228/9535/5008/5967/7076/4969/5154/7043/7423/1839/26291/1435/9518/5473/2069/3625/3624/2246/7425/3714/29948/3569/4909/650/4803/649/3082/1437/7422/79874/392255/654/255324/10637/1440/3589/652/2821/2252/7044
GO_EXTRACELLULAR_MATRIX_BINDING	GO_EXTRACELLULAR_MATRIX_BINDING	53	0.619414	2.13912	3.28764e-06	0.000157003	0.000130955	1763	tags=42%, list=10%, signal=38%	3958/27076/3956/2817/302/375790/633/7045/1634/3675/161198/1893/6695/131578/169611/3921/64129/170689/57124/8404/2199/284297
GO_POSITIVE_REGULATION_OF_ERK1_AND_ERK2_CASCADE	GO_POSITIVE_REGULATION_OF_ERK1_AND_ERK2_CASCADE	192	0.415884	1.73939	3.2923e-06	0.000157003	0.000130955	3945	tags=37%, list=22%, signal=29%	2621/4282/7040/5155/414062/5159/348/57007/6348/10519/54209/10268/6361/6366/3725/1652/59341/5154/1436/26291/5728/6278/5031/3265/1116/8685/8482/972/8829/284/3383/4035/6367/2324/6351/2056/2149/650/27020/2771/7124/5322/10457/3791/5151/84868/6370/920/8600/6368/652/948/409/2889/6464/54550/65009/5320/6369/2261/2185/10347/388121/728/23779/6375/9464/4851/388325/1880/10344
GO_RESPONSE_TO_CAMP	GO_RESPONSE_TO_CAMP	96	0.516181	1.938	3.55906e-06	0.000167458	0.000139675	3651	tags=43%, list=20%, signal=34%	3726/8061/445/2353/53905/2354/1843/6382/374/7056/358/3725/218/682/5179/2819/4327/1036/7425/65010/1277/5138/5798/51763/5724/610/5322/677/4724/6720/5970/5105/10411/2889/50506/133522/1811/1609/3727/2185/6528
GO_PROTEASE_BINDING	GO_PROTEASE_BINDING	126	0.467925	1.85159	4.29329e-06	0.000193745	0.000161601	3768	tags=47%, list=21%, signal=37%	3934/4282/144568/302/1471/5054/3675/1893/6318/6317/5045/7076/54507/6786/374291/7079/4155/5728/1281/4102/9507/1476/11315/8996/8915/5265/65018/1277/2191/8738/5621/831/4035/1311/7450/2/1278/267/7124/5275/10017/2152/11236/7316/5886/7077/970/1475/5660/84447/91319/7078/5428/147372/8780/2335/10752/114769/219743
GO_FIBRINOLYSIS	GO_FIBRINOLYSIS	27	0.749705	2.20662	5.60997e-06	0.000244944	0.000204306	1482	tags=41%, list=8%, signal=37%	2161/302/5055/7056/5054/5328/5627/5329/710/3848/2191
GO_REGULATION_OF_RESPONSE_TO_WOUNDING	GO_REGULATION_OF_RESPONSE_TO_WOUNDING	166	0.41646	1.70526	5.69456e-06	0.000247034	0.000206048	2616	tags=32%, list=14%, signal=28%	6665/2161/11202/53905/9076/302/5155/9314/5055/7056/857/348/5054/5328/2303/64094/5627/5329/710/4638/51330/1906/6915/10630/5154/135228/4846/1839/5728/2207/301/5605/3848/8578/3265/2697/5580/2191/4627/947/4035/5592/2155/2149/150/6696/8428/83481/54361/928/5327/5341/2152
GO_CARTILAGE_DEVELOPMENT	GO_CARTILAGE_DEVELOPMENT	199	0.404015	1.70615	6.01181e-06	0.000259124	0.000216133	2370	tags=32%, list=13%, signal=28%	6591/4322/4488/1292/1291/7040/302/1294/116039/3373/1513/633/5307/7045/176/4060/1893/130497/5310/2101/64856/7076/4487/4094/10736/5396/1906/59341/1293/94/864/81029/150356/4054/6615/85301/4148/1116/9241/7483/6423/7477/1277/3202/6474/7476/5744/51738/4920/6722/1311/85477/8372/388585/861/650/649/8092/5915/50515/5916/392255/654/642658
GO_RIBOSOME	GO_RIBOSOME	220	0.393247	1.67845	6.63542e-06	0.000280607	0.000234052	3827	tags=43%, list=21%, signal=34%	6209/54998/6142/3040/11224/9045/6159/6132/3921/6137/64981/6161/6176/64975/64951/6156/6122/51187/116541/6218/6207/64432/6135/6228/6146/55052/6129/6203/28957/51116/6223/6138/6124/6175/51065/25873/6130/6141/65993/6227/10240/8667/6164/6125/6182/6158/440275/6235/92259/6133/6128/219927/6168/64963/78988/6181/6187/6194/90480/6171/6202/4736/28998/6191/6144/6155/689/6188/6224/6152/6217/6204/6136/6210/51073…
GO_NEGATIVE_REGULATION_OF_COAGULATION	GO_NEGATIVE_REGULATION_OF_COAGULATION	54	0.603518	2.09257	7.85345e-06	0.000327991	0.000273574	1800	tags=37%, list=10%, signal=33%	2161/302/5155/5055/7056/348/5054/5328/10544/5627/5329/710/1906/5154/4846/3848/5580/2191/947/5592
GO_REGULATION_OF_WOUND_HEALING	GO_REGULATION_OF_WOUND_HEALING	137	0.450326	1.78791	8.57047e-06	0.000352712	0.000294194	2954	tags=36%, list=16%, signal=31%	6665/2161/53905/9076/302/5155/5055/7056/857/348/5054/5328/2303/64094/5627/5329/710/4638/51330/1906/6915/10630/5154/135228/4846/1839/5728/2207/301/3848/3265/2697/5580/2191/4627/947/5592/2155/2149/150/83481/54361/928/5327/5341/2152/5270/308/948/4067
GO_PROTEIN_TARGETING_TO_MEMBRANE	GO_PROTEIN_TARGETING_TO_MEMBRANE	190	0.403552	1.68621	8.60273e-06	0.000352712	0.000294194	3125	tags=41%, list=17%, signal=34%	83597/6209/10519/6142/11224/11261/85377/9045/6159/6132/3921/6137/2040/6161/6176/51024/6156/6122/6218/401647/6207/6135/6228/3689/6146/6129/3265/6203/130617/6223/6138/6124/51201/6175/25873/6130/6141/6727/6227/5621/6164/6125/51763/84885/6449/6158/6235/6133/79720/84243/6128/6168/10952/6181/3745/6187/6194/6171/6202/4736/64108/6191/6144/6155/6188/6224/6152/1020/4641/6217/6204/29800/6136/6210/254359/623…
GO_CALCIUM_DEPENDENT_PROTEIN_BINDING	GO_CALCIUM_DEPENDENT_PROTEIN_BINDING	59	0.591837	2.06991	8.82879e-06	0.000357619	0.000298287	2488	tags=41%, list=14%, signal=35%	6277/6286/90019/6275/302/11261/6282/301/6271/306/553115/7140/7125/6548/5621/5881/6616/2/307/10814/79720/311/26012/10015
GO_RESPONSE_TO_METAL_ION	GO_RESPONSE_TO_METAL_ION	356	0.341321	1.52781	9.41374e-06	0.000373134	0.000311227	1827	tags=18%, list=10%, signal=16%	3861/360/140576/4493/3726/4318/706/90019/2167/4502/445/2353/10397/9076/6284/2354/1843/6382/567/4501/712/595/857/10312/3779/387758/6649/2934/358/3725/572/6786/1906/2021/2203/6652/5728/7226/682/929/3297/91252/4776/5179/210/79901/5176/11315/553115/7054/7036/3383/57817/468/10272/6898/5066/1050/5621/48/5350/1396/107
GO_MONOCYTE_CHEMOTAXIS	GO_MONOCYTE_CHEMOTAXIS	62	0.575703	2.02651	9.49511e-06	0.000373227	0.000311305	3145	tags=45%, list=17%, signal=38%	57402/3958/4681/5155/1843/414062/6348/5054/6361/6366/199/6387/301/6278/6223/3569/6367/6351/56833/2321/10488/6370/8600/6368/4067/5641/5800/3570
GO_LARGE_RIBOSOMAL_SUBUNIT	GO_LARGE_RIBOSOMAL_SUBUNIT	114	0.474081	1.84851	9.54716e-06	0.000373227	0.000311305	3929	tags=47%, list=21%, signal=37%	6142/11224/9045/6159/6132/6137/64981/6161/6176/64975/6156/6122/51187/116541/6135/6146/55052/6129/6138/6124/6175/25873/6130/6141/6164/6125/6182/6158/6133/6128/219927/6168/78988/6181/6171/4736/28998/6144/6155/6152/6136/51073/51264/6157/23521/6166/29074/64928/4706/84769/122704/6134/7311/140801
GO_POSITIVE_REGULATION_OF_STEROID_METABOLIC_PROCESS	GO_POSITIVE_REGULATION_OF_STEROID_METABOLIC_PROCESS	27	0.740081	2.17829	1.01384e-05	0.000391784	0.000326783	3101	tags=56%, list=17%, signal=46%	183/348/3553/26119/133/2246/341/7124/54361/654/185/6720/9619/10891/9572
GO_POSITIVE_REGULATION_OF_LEUKOCYTE_MIGRATION	GO_POSITIVE_REGULATION_OF_LEUKOCYTE_MIGRATION	126	0.458941	1.81604	1.02797e-05	0.000394976	0.000329445	2267	tags=30%, list=12%, signal=27%	57402/3958/2621/9547/5919/7499/8764/6348/5054/7070/54209/5880/7424/6366/199/8784/6387/5228/83483/1906/59341/7423/4267/1435/4323/6278/972/3383/1240/3569/2155/5724/6351/284114/63940/7124/719/7422
GO_NEGATIVE_REGULATION_OF_CELL_MOTILITY	GO_NEGATIVE_REGULATION_OF_CELL_MOTILITY	261	0.371648	1.61346	1.0699e-05	0.000404019	0.000336988	2597	tags=27%, list=14%, signal=24%	3868/10076/4681/4282/11117/6237/7040/79148/1843/9314/4092/348/7122/1634/5054/114757/7070/182/6366/199/29775/6387/7076/127435/5797/1652/54567/6915/94/225689/3204/90865/8751/5728/10395/1281/7075/5176/2950/972/7168/2697/9241/57152/6423/5734/56477/3486/104/7454/6722/4035/5592/28984/393/56833/4345/2022/8428/2796/83481/79812/54361/63923/6910/80031/60672/55466/25930/8519/6370
GO_REGULATION_OF_LEUKOCYTE_CHEMOTAXIS	GO_REGULATION_OF_LEUKOCYTE_CHEMOTAXIS	108	0.469575	1.81914	1.0721e-05	0.000404019	0.000336988	2267	tags=31%, list=12%, signal=28%	57402/2621/4681/9547/4282/79148/1843/5919/6348/5054/5880/7424/6366/199/6387/5228/1652/1906/59341/7423/1435/6278/83700/972/1240/3569/2155/80024/6351/56833/284114/63940/719/7422
GO_NEGATIVE_REGULATION_OF_CELL_ADHESION	GO_NEGATIVE_REGULATION_OF_CELL_ADHESION	266	0.365391	1.59163	1.25142e-05	0.000459812	0.000383524	3182	tags=34%, list=17%, signal=28%	53827/441478/3958/4582/6591/445/3956/80139/7040/1843/9314/4321/4092/8764/7045/5054/91663/182/6695/2633/6366/6387/2615/3142/10631/59341/11170/94/4155/9647/3204/864/8751/5728/604/10395/6385/301/4323/79626/83700/3135/23129/80149/972/3659/5580/11326/3620/1277/56477/284/5362/5621/4035/9404/5592/6494/28984/861/650/395/29126/2796/7422/10457/23654/654/928/942/27289/84868/140706/51043/6370/5361/58494/5270…
GO_MULTI_MULTICELLULAR_ORGANISM_PROCESS	GO_MULTI_MULTICELLULAR_ORGANISM_PROCESS	225	0.383973	1.63872	1.29095e-05	0.000469208	0.000391361	2814	tags=27%, list=15%, signal=23%	3726/8061/4318/43847/2353/183/2354/23764/2706/3134/8614/7056/1307/3490/4316/3675/4313/5228/3553/7076/6159/1906/3133/85360/7043/3678/23780/682/2113/1508/3135/10266/3297/133/1312/2697/3620/2099/5066/5744/51738/5724/8372/1594/2056/8398/5241/6696/353091/2796/5740/54361/2057/84868/1394/340784/639/5270/3673/8605
GO_VESICLE_LUMEN	GO_VESICLE_LUMEN	322	0.352736	1.55639	1.32191e-05	0.000477878	0.000398593	2284	tags=25%, list=12%, signal=23%	6286/93100/2621/3934/4282/6590/3671/9961/7040/302/5155/567/5919/1265/1512/8566/5054/1893/126014/6317/5274/7424/1727/718/87/1675/5627/410/29952/23406/51368/710/30/10321/9535/2934/7076/83706/2512/7123/10577/5154/7043/7423/6282/3101/6278/5179/210/5873/5473/1476/2950/2922/1116/1509/5265/54863/2760/10549/5580/3310/353/6727/80142/54472/51738/213/387921/7450/2/1774/5476/26578/2162/8635/3082/5211/79792/2…
GO_NUCLEAR_TRANSCRIBED_MRNA_CATABOLIC_PROCESS_NONSENSE_MEDIATED_DECAY	GO_NUCLEAR_TRANSCRIBED_MRNA_CATABOLIC_PROCESS_NONSENSE_MEDIATED_DECAY	119	0.456378	1.79379	1.33086e-05	0.000478539	0.000399145	3125	tags=49%, list=17%, signal=41%	6209/6142/11224/9045/6159/6132/3921/6137/6161/6176/9811/6156/6122/6218/6207/6135/6228/6146/6129/6203/6223/6138/6124/6175/25873/6130/6141/3646/6227/6164/6125/6158/56006/6235/6133/65110/6128/6168/6181/154197/6187/6194/6171/6202/4736/6191/6144/6155/6188/6224/6152/6217/6204/6136/6210/6234/6230/6231
GO_EXTRACELLULAR_MATRIX_DISASSEMBLY	GO_EXTRACELLULAR_MATRIX_DISASSEMBLY	76	0.541014	1.96553	1.55847e-05	0.000545789	0.000455237	3516	tags=57%, list=19%, signal=46%	4318/4322/7040/5654/1471/4321/1513/4316/5045/4313/4320/7076/823/6624/4319/10630/8751/682/2113/4323/4921/9507/4327/2191/4035/3569/826/7177/2/4314/649/1511/4312/9622/80274/102/7077/1515/25818/3817/101/4317/84290
GO_POSITIVE_REGULATION_OF_CALCIUM_ION_IMPORT	GO_POSITIVE_REGULATION_OF_CALCIUM_ION_IMPORT	20	0.784718	2.1637	1.68492e-05	0.00058399	0.0004871	943	tags=35%, list=5%, signal=33%	3958/5155/5159/6348/10268/6387/51393
GO_GROWTH_FACTOR_BINDING	GO_GROWTH_FACTOR_BINDING	130	0.441738	1.74742	1.79151e-05	0.000611478	0.000510028	2351	tags=35%, list=13%, signal=31%	1291/2817/6284/3489/5654/5155/1843/8828/83888/5159/3490/8425/9982/5045/4915/94031/2615/3480/5154/135228/1289/7043/27286/94/1281/4054/7850/6223/8829/1277/3486/4053/9001/2324/2/2321/1278/2022/11082/7049/3487/10952/22918/6187/3791/51232
GO_RENAL_SYSTEM_PROCESS	GO_RENAL_SYSTEM_PROCESS	116	0.453918	1.77273	2.00955e-05	0.000679007	0.000566353	3198	tags=33%, list=17%, signal=27%	360/2621/183/5155/3043/4883/3675/1535/2934/358/1906/4162/525/133/1312/2697/4645/196883/108/947/51763/107/2149/2771/50484/4643/56670/1141/185/2702/5575/652/115/3037/5641/5800/10391/5660
GO_GOLGI_LUMEN	GO_GOLGI_LUMEN	99	0.491158	1.8531	2.03713e-05	0.000684884	0.000571255	2080	tags=35%, list=11%, signal=32%	2621/4582/7475/118430/2817/7040/375790/5549/5155/6382/94025/633/1634/176/4060/5045/5627/6649/4320/4969/5154/81029/6385/4323/51150/2159/6383/7477/7476/56667/1673/10082/2155/1464/4803
GO_CELL_ADHESION_MOLECULE_BINDING	GO_CELL_ADHESION_MOLECULE_BINDING	465	0.315241	1.46319	2.10677e-05	0.000704773	0.000587844	3190	tags=31%, list=17%, signal=27%	5317/6286/53827/23650/11135/2810/3914/9351/11117/10397/55357/302/10848/1307/1265/7045/7408/3675/5339/8425/7070/79180/87/4240/6387/85377/3553/832/5214/5797/9045/6159/83706/11187/10755/1936/79026/6624/10631/7106/29766/1289/7087/8751/6282/6520/3678/9973/682/977/301/1281/4323/83700/3689/5817/6455/3303/10458/11315/2246/9636/8482/83874/6138/2023/10938/6423/56904/3913/2191/3383/6130/23348/3646/8407/3909…
GO_HEMOGLOBIN_COMPLEX	GO_HEMOGLOBIN_COMPLEX	12	0.881388	2.13326	2.26247e-05	0.000737902	0.000615477	468	tags=25%, list=3%, signal=24%	3043/1727/3040
GO_COAGULATION	GO_COAGULATION	322	0.347512	1.53334	2.49169e-05	0.000794033	0.000662295	3375	tags=29%, list=18%, signal=24%	10398/2621/2161/653145/23764/302/5155/6288/5055/7056/857/348/3043/5054/5328/3315/10544/5627/30846/2769/5329/710/832/83706/2151/1906/6915/10630/5154/4846/2767/2207/1281/3848/5873/2159/5265/3659/5580/10938/7409/1277/2191/7975/23348/4627/7454/2316/947/5890/6722/5592/1311/3569/2155/7450/2149/8323/150/2/1278/2162/140628/558/1465/160851/928/3705/5327/5341/5575/1606/2152/7225/5270/3673/10362/308/948/802…
GO_RESPONSE_TO_CORTICOSTEROID	GO_RESPONSE_TO_CORTICOSTEROID	161	0.407095	1.65415	2.75465e-05	0.000869591	0.000725317	2232	tags=27%, list=12%, signal=24%	10076/8061/7538/445/2353/249/9076/2354/1843/6382/2706/374/595/3490/1978/199/1535/387758/358/572/1906/114907/11170/218/301/210/5176/2950/306/133/1036/7054/7477/1277/3383/6898/5066/3569/5724/2056/6586/2022/7124/2796
GO_ODORANT_BINDING	GO_ODORANT_BINDING	85	0.497745	1.85451	2.91211e-05	0.000902351	0.000752642	2179	tags=2%, list=12%, signal=2%	29991/29989
GO_INNER_MITOCHONDRIAL_MEMBRANE_PROTEIN_COMPLEX	GO_INNER_MITOCHONDRIAL_MEMBRANE_PROTEIN_COMPLEX	98	0.481465	1.8127	3.11015e-05	0.000950575	0.000792865	3776	tags=43%, list=21%, signal=34%	400916/84419/1537/91689/84701/56901/293/374291/4715/29103/4713/51103/790955/1327/7384/79135/6390/4723/4700/7381/51079/29796/4712/1337/4728/140823/80273/26519/4716/126328/4724/7386/4702/51025/4729/4726/10245/9377/4708/4706/27089/4695
GO_DEFENSE_RESPONSE_TO_BACTERIUM	GO_DEFENSE_RESPONSE_TO_BACTERIUM	242	0.361991	1.56059	3.16885e-05	0.000964133	0.000804174	3209	tags=24%, list=18%, signal=20%	3853/57402/3934/54/6590/5919/8764/5054/10417/2634/54209/1535/3133/6156/2207/6278/602/115361/5473/306/6039/23005/9636/163351/387695/7425/23166/6223/5580/10133/57817/22861/1969/284297/1673/3569/353142/56833/8398/7124/79792/140823/2268/3543/84868/1511/920/566/1113/3394/948/5027/100423062/23208/3570/128488/25818
GO_MONONUCLEAR_CELL_MIGRATION	GO_MONONUCLEAR_CELL_MIGRATION	84	0.510892	1.88863	3.2795e-05	0.000988849	0.000824789	3145	tags=42%, list=17%, signal=35%	57402/3958/4681/5155/1843/414062/5919/6348/5054/6361/6366/199/6387/59341/1435/301/6278/6223/5175/1240/3569/6367/6351/56833/2321/7124/719/10488/6370/8600/6368/4067/5641/5800/3570
GO_CYTOSOLIC_SMALL_RIBOSOMAL_SUBUNIT	GO_CYTOSOLIC_SMALL_RIBOSOMAL_SUBUNIT	42	0.620802	2.01147	3.50054e-05	0.00105079	0.00087645	3125	tags=55%, list=17%, signal=46%	6209/3040/3921/6218/6207/6228/6203/6223/51065/6227/6235/6187/6194/6202/6191/6188/6224/6217/6204/6210/6234/6230/6231
GO_ATP_SYNTHESIS_COUPLED_ELECTRON_TRANSPORT	GO_ATP_SYNTHESIS_COUPLED_ELECTRON_TRANSPORT	83	0.511004	1.87925	3.6426e-05	0.00108857	0.000907966	3895	tags=51%, list=21%, signal=40%	1537/1345/84701/1351/374291/4715/29103/10975/4713/51103/11315/790955/1327/7384/65018/4723/4700/7381/1349/51079/1340/29796/4712/1337/23479/4728/4716/126328/4724/7386/4702/4729/4726/1329/9377/4708/57017/4706/27089/4695/1350/4707
GO_CONTRACTILE_FIBER	GO_CONTRACTILE_FIBER	234	0.367794	1.57844	3.87899e-05	0.0011539	0.000962455	3617	tags=29%, list=20%, signal=23%	7169/113146/10398/9260/59/57158/1674/3880/5339/64236/10529/3315/7136/87/4313/832/9997/114907/79026/3856/7079/29766/29767/23336/8572/6385/6271/100820829/2274/3741/7168/7140/6138/2023/8878/3620/7125/5175/10273/2316/26287/9124/11344/1465/226/2318/800/2275/8470/493/775/9531/1410/91624/6607/23676/3611/84676/4634/5239/801/10060/7138/2317/4636/283284/825
GO_ANTIGEN_BINDING	GO_ANTIGEN_BINDING	50	0.580974	2.00412	3.92537e-05	0.0011539	0.000962455	3653	tags=52%, list=20%, signal=42%	7040/3134/10417/3115/3123/3133/3119/7106/3135/6890/3117/3122/912/3113/8547/3543/23428/3127/11006/30835/100423062/3902/958/11027/6892/962
GO_VASCULAR_PROCESS_IN_CIRCULATORY_SYSTEM	GO_VASCULAR_PROCESS_IN_CIRCULATORY_SYSTEM	166	0.390943	1.60078	3.97835e-05	0.0011539	0.000962455	2574	tags=30%, list=14%, signal=26%	183/7040/59/2053/857/348/80005/3779/2303/2876/5029/5797/1909/1906/6915/59341/136/3363/4846/10266/3741/1889/133/3352/11156/2730/388125/2697/3269/284/3383/5138/3672/5592/1311/5724/2149/150/8398/6648/154/147/7422/654/185/146/3792/2702/56998
GO_AMEBOIDAL_TYPE_CELL_MIGRATION	GO_AMEBOIDAL_TYPE_CELL_MIGRATION	376	0.326196	1.47823	3.98133e-05	0.0011539	0.000962455	1702	tags=21%, list=9%, signal=19%	3868/6273/6286/4318/54345/183/7040/5155/9314/8828/3373/348/1512/3164/1634/3675/7041/114757/80005/9982/10519/161198/3315/7424/2303/64094/51421/29775/2876/7076/5797/3725/10755/54567/1906/6915/54566/1948/85360/9564/4846/27286/94/9647/1839/5728/2113/6385/301/3689/4921/340719/5176/3397/306/23129/2246/80149/8482/11156/2697/5371/64321/30812/8742/5646/10000/8829/2191/284/9922/57449/57381/5175/7476/1947/4…
GO_REGULATION_OF_COAGULATION	GO_REGULATION_OF_COAGULATION	82	0.516514	1.89929	4.45714e-05	0.00125924	0.00105032	2954	tags=41%, list=16%, signal=35%	2161/302/5155/5055/7056/857/348/5054/5328/10544/5627/5329/710/1906/6915/10630/5154/4846/2207/3848/5580/2191/947/5592/2155/2149/928/5327/5341/2152/5270/308/948/4067
GO_CORNIFIED_ENVELOPE	GO_CORNIFIED_ENVELOPE	45	0.60841	2.03601	5.51104e-05	0.0015187	0.00126673	2490	tags=47%, list=14%, signal=40%	1830/5317/6699/1825/8796/3713/5266/6698/11187/6704/6700/84518/7051/301/3848/1474/6703/6706/2125/23254/6707
GO_ELECTRON_TRANSPORT_CHAIN	GO_ELECTRON_TRANSPORT_CHAIN	167	0.396921	1.62601	5.59997e-05	0.00153066	0.00127671	3895	tags=44%, list=21%, signal=35%	1346/84419/7264/22977/1537/1345/1535/8574/84701/56901/1351/374291/4715/83442/29103/10975/4713/2877/51103/9249/11315/790955/1327/2819/7384/217/170712/65018/3620/6390/4723/4700/7381/1347/80142/1349/51079/1340/29796/4712/1337/6834/23479/4728/79751/2108/2745/4716/126328/4724/4017/7386/2109/4702/8608/10891/4729/8974/84883/4726/91942/1329/9377/4708/1728/57017/1536/4706/27089/4695/653361/10587/1350/4707
GO_PLATELET_DEGRANULATION	GO_PLATELET_DEGRANULATION	125	0.431619	1.70436	6.00309e-05	0.00162107	0.00135212	3694	tags=45%, list=20%, signal=36%	2621/7277/3671/7040/5155/5919/5054/1893/7424/87/1675/5627/23052/51368/710/7076/83706/7123/5154/135228/7043/7423/2207/5473/5265/54863/5175/8407/2316/213/7450/2/2162/9948/3082/51706/226/7422/6813/928/5341/308/7044/948/4067/10184/10447/5660/7078/967/1521/801/5099/10490/2335/5196
GO_HYDROLASE_ACTIVITY_ACTING_ON_ACID_PHOSPHORUS_NITROGEN_BONDS	GO_HYDROLASE_ACTIVITY_ACTING_ON_ACID_PHOSPHORUS_NITROGEN_BONDS	176	0.396109	1.63656	6.4309e-05	0.00171593	0.00143124	4686	tags=42%, list=26%, signal=32%	5655/2161/4318/43847/11012/11202/5654/64699/5653/1512/4316/5328/5045/1675/94031/4313/29952/717/64063/2159/5646/2191/3004/715/2155/7177/10942/8398/5476/4314/3082/255738/3991/113791/23478/5327/2152/1511/11098/566/4312/9622/1804/25807/25818/59342/327/3817/3250/101/4317/716/91039/219743/9407/341350/64499/27429/83752/5624/8858/354/90701/164656/57414/8192/80975/5122/146547/83886/56649/84000/339501/2843…
GO_ENZYME_INHIBITOR_ACTIVITY	GO_ENZYME_INHIBITOR_ACTIVITY	362	0.320465	1.43653	7.07872e-05	0.00185203	0.00154476	2363	tags=20%, list=13%, signal=18%	5268/3958/2621/1469/2810/55450/144568/6590/183/302/1294/1471/5055/6692/5973/5054/10519/3315/6695/6318/6317/5045/5274/5266/718/5627/11261/710/9535/85450/7076/4946/646424/221908/6050/7079/25824/1293/721/135228/81706/301/6135/8710/1476/5176/306/404203/51050/8996/5265/402/1474/341/6195/94274/392617/10406/5621/831/6125/5350/4947/11142/2/307/4803/149708/56925/221476/720/2644/51232/27344
GO_NEGATIVE_REGULATION_OF_WOUND_HEALING	GO_NEGATIVE_REGULATION_OF_WOUND_HEALING	73	0.517974	1.87361	7.41118e-05	0.0019315	0.00161105	2908	tags=38%, list=16%, signal=32%	2161/302/5155/5055/7056/348/5054/5328/5627/5329/710/1906/5154/135228/4846/5728/3848/2697/5580/2191/947/5592/83481/54361/928/5327/5270/308
GO_RESPONSE_TO_ORGANOPHOSPHORUS	GO_RESPONSE_TO_ORGANOPHOSPHORUS	135	0.418757	1.66337	8.1085e-05	0.00209979	0.00175141	3935	tags=39%, list=22%, signal=31%	3726/8061/445/2353/53905/2354/1843/6382/374/7056/3553/5029/358/3725/5728/218/682/5031/5179/2819/4327/1036/7425/65010/1277/5138/5798/51763/5724/610/5322/677/4724/6720/5027/5970/5105/10411/2889/10060/5032/50506/10518/133522/1811/1609/3727/2185/6528/6263/5025/9370/5026
GO_REGULATION_OF_BLOOD_PRESSURE	GO_REGULATION_OF_BLOOD_PRESSURE	177	0.390399	1.61476	8.11936e-05	0.00209979	0.00175141	4371	tags=41%, list=24%, signal=32%	2621/183/59/5155/2053/5973/3043/4883/4311/7424/1535/1909/1906/6915/10631/4882/170690/4846/94/9424/1066/10266/1889/133/7168/2697/57085/1359/947/5724/2149/6648/1278/154/5331/6518/147/56670/9607/185/146/2702/1511/89797/476/1113/28514/5800/5021/10391/59342/3817/66002/7026/554/347148/5025/552/9370/2784/387/7137/774/2028/4879/11188/7349/3291/5023/6647/81285/354/8195
GO_CELL_SUBSTRATE_JUNCTION_ORGANIZATION	GO_CELL_SUBSTRATE_JUNCTION_ORGANIZATION	98	0.466888	1.75782	8.23727e-05	0.00212212	0.00177004	2336	tags=34%, list=13%, signal=30%	3861/3852/3914/6281/1307/29984/5339/7070/87/1613/1308/11170/94/9647/5728/3678/10395/977/6385/4323/8829/3909/123720/6548/3918/4035/7205/2017/2042/395/7422/3791/54361
GO_GRANULOCYTE_MIGRATION	GO_GRANULOCYTE_MIGRATION	135	0.418082	1.66069	8.50403e-05	0.00216318	0.00180429	2244	tags=27%, list=12%, signal=24%	57402/3958/414062/6288/5919/7499/6348/5880/6361/6366/84818/5293/3553/1906/59341/4267/2207/1435/301/6278/83700/3689/391/5473/972/3269/7409/5734/5175/3672/1240/6367/6351/56833/9948/719
GO_NEGATIVE_REGULATION_OF_HYDROLASE_ACTIVITY	GO_NEGATIVE_REGULATION_OF_HYDROLASE_ACTIVITY	433	0.306301	1.41054	8.50405e-05	0.00216318	0.00180429	2363	tags=20%, list=13%, signal=18%	5268/3958/2621/1469/2810/4318/653145/144568/6590/183/1294/9314/1471/5055/6692/5799/5973/5054/1893/6695/6318/6317/5045/5274/5266/718/5627/2876/11261/5329/710/7076/358/646424/221908/7079/25824/1293/721/135228/81706/4846/301/728113/8710/4102/1476/5176/11315/3265/404203/51050/8996/5265/402/1474/341/7483/6195/6423/94274/23645/392617/55795/63898/57718/10406/5621/831/4035/5350/9049/2/2771/4803/149708/14…
GO_POSITIVE_REGULATION_OF_VASCULATURE_DEVELOPMENT	GO_POSITIVE_REGULATION_OF_VASCULATURE_DEVELOPMENT	182	0.379235	1.5673	8.80596e-05	0.00222599	0.00185667	2331	tags=32%, list=13%, signal=29%	6237/5155/9314/3373/1512/5054/9982/10519/1893/3315/7424/718/2303/64094/5228/3553/358/6786/126393/6915/1948/187/4846/27286/94/8038/7423/3678/2113/301/6271/8710/3689/10266/7075/306/133/1116/2246/80149/1958/8742/6423/10000/8829/57381/51738/947/51548/861/6648/2321/2022/3082/719/56005/7422/5740/3791
GO_REGULATION_OF_CHEMOTAXIS	GO_REGULATION_OF_CHEMOTAXIS	204	0.369273	1.55579	9.40252e-05	0.00234449	0.00195551	2433	tags=25%, list=13%, signal=22%	57402/2621/4681/9547/4282/7040/79148/5155/1843/9048/5919/5159/6348/5054/3315/54209/5880/7424/6366/64094/199/6387/5228/1652/1906/1948/59341/9647/7423/1435/6278/83700/2950/2246/8482/972/8829/1240/3569/2155/80024/6351/56833/284114/63940/719/7422/3791/56670/10488/80031
GO_STRUCTURAL_CONSTITUENT_OF_SKIN_EPIDERMIS	GO_STRUCTURAL_CONSTITUENT_OF_SKIN_EPIDERMIS	14	0.831469	2.08195	0.000103745	0.00252747	0.00210814	1149	tags=36%, list=6%, signal=33%	5317/5266/6698/6704/3848
GO_MHC_PROTEIN_COMPLEX	GO_MHC_PROTEIN_COMPLEX	19	0.763934	2.05032	0.000119672	0.00286362	0.00238852	3500	tags=89%, list=19%, signal=72%	567/3134/3115/3123/3133/3119/3135/972/3117/3108/3109/3122/3113/3127/3118/3111/3120
GO_PASSIVE_TRANSMEMBRANE_TRANSPORTER_ACTIVITY	GO_PASSIVE_TRANSMEMBRANE_TRANSPORTER_ACTIVITY	453	0.297926	1.38068	0.000124017	0.00295706	0.00246645	4511	tags=30%, list=25%, signal=23%	360/9022/5349/2707/2621/3755/22821/302/2706/57158/10804/27112/3779/5310/2563/6330/358/1259/56262/60598/160728/59341/3757/9424/53373/51393/79054/7226/2901/3772/6324/3741/3764/2697/65010/5348/84230/8542/6340/5138/10089/10452/8514/6616/84286/27092/93129/2562/610/3751/3760/3745/527/7417/2894/1193/1141/10008/127534/2702/30818/3752/9311/2905/93589/7225/1020/2705/775/9635/364/117144/2568/5027/9780/2556/…
GO_PEPTIDE_CROSS_LINKING	GO_PEPTIDE_CROSS_LINKING	34	0.64414	1.99821	0.000128231	0.003036	0.0025323	4002	tags=59%, list=22%, signal=46%	6699/633/1634/3713/5266/6698/6704/7051/301/1281/3848/2162/2125/1475/3849/10347/2335/9806/9333/7057
GO_NEGATIVE_REGULATION_OF_LOCOMOTION	GO_NEGATIVE_REGULATION_OF_LOCOMOTION	307	0.329319	1.44271	0.000129554	0.00305657	0.00254946	2634	tags=25%, list=14%, signal=22%	3868/10076/4681/4282/11117/6237/7040/79148/1843/9314/4092/348/7122/1634/5054/114757/7070/182/6366/199/29775/6387/7076/127435/5797/1652/54567/6915/94/225689/3204/90865/8751/5728/10395/1281/7075/5176/2950/8482/972/7168/2697/5371/9241/57152/6423/8829/5734/56477/3486/104/7454/51738/6722/4035/5592/28984/393/56833/4345/2022/8428/2796/10206/83481/79812/54361/63923/6910/80031/60672/55466/25930/8519/6370/…
GO_CARBOHYDRATE_DERIVATIVE_CATABOLIC_PROCESS	GO_CARBOHYDRATE_DERIVATIVE_CATABOLIC_PROCESS	181	0.375691	1.55044	0.000132132	0.00309566	0.00258206	2112	tags=25%, list=12%, signal=23%	26232/1890/2817/7040/375790/5549/9582/6382/1471/4321/3373/633/5973/1634/7378/176/4060/11261/5141/1854/215/4969/6385/79873/55190/342897/3425/2819/26270/2760/5580/6383/51005/5138/6548/4245/4907/10082/30833/4913/8372/200316/1464/93611/3704/11332
GO_CELL_MATRIX_ADHESION	GO_CELL_MATRIX_ADHESION	218	0.364113	1.55042	0.000134908	0.00313882	0.00261806	2826	tags=30%, list=15%, signal=26%	10232/27076/11117/6281/4321/1307/29984/50509/5054/3675/5328/7070/10519/182/7791/6366/87/3897/5310/1613/1308/10631/11170/94/9647/3204/8751/5728/604/10395/6385/22801/1435/1281/4323/83700/3689/8516/8829/56477/5175/123720/6548/3672/947/3693/6722/4035/7205/2017/6614/2042/395/55612/7422/3791/54361/63923/22795/3679/6370/64098/1020/342184/3673/81792
GO_POSITIVE_REGULATION_OF_CELL_ACTIVATION	GO_POSITIVE_REGULATION_OF_CELL_ACTIVATION	313	0.325797	1.43494	0.000138807	0.00321599	0.00268242	3623	tags=33%, list=20%, signal=27%	6665/2621/4282/7293/3956/7040/3134/857/5159/8764/10673/6348/8660/7070/7305/54209/6366/3115/199/3553/3142/572/3133/1948/1326/10630/136/90865/864/604/2207/8744/301/4323/3135/3689/8915/972/6195/7409/283234/79155/55795/1947/1050/3109/3569/5724/2056/3635/861/3280/3916/29126/558/1445/912/3113/3594/148022/695/1141/942/2268/8673/3543/84868/5341/3606/51043/975/30011/920/8600/6188/84807/923/1960/64926/1604…
GO_NEGATIVE_REGULATION_OF_CELL_CELL_ADHESION	GO_NEGATIVE_REGULATION_OF_CELL_CELL_ADHESION	170	0.385562	1.58752	0.000145059	0.00330635	0.00275779	3133	tags=33%, list=17%, signal=28%	53827/441478/3958/6591/445/80139/7040/9314/4092/8764/91663/182/6366/6387/2615/3142/59341/4155/9647/864/604/6385/301/79626/3135/80149/972/3659/5580/11326/3620/56477/5621/5592/28984/861/650/29126/2796/7422/10457/654/928/942/84868/140706/51043/6370/5270/84807/652/10875/10288/3557/11314/5074
GO_CYTOKINE_SECRETION	GO_CYTOKINE_SECRETION	228	0.357673	1.53222	0.00015644	0.00349641	0.00291632	2228	tags=23%, list=12%, signal=21%	2621/4282/7293/80772/6284/183/6288/4321/5600/10312/8764/6348/2633/199/84818/2615/3553/5008/115362/10631/59341/1436/4155/90865/114900/301/929/192683/7850/1116/80149/23005/9636/83786/5371/5734/284/9447/22861/51738/947/284297/4035/965/28984/2149/307/4345/2867/29126/7124/55612/79792
GO_TERTIARY_GRANULE	GO_TERTIARY_GRANULE	160	0.384241	1.56107	0.00015823	0.00350506	0.00292353	3580	tags=39%, list=20%, signal=31%	5317/3958/4318/1471/567/1265/10312/5799/1512/3043/5328/126014/1535/10321/2040/427/2207/7226/3689/6515/5473/1476/1509/7130/79895/374395/5646/83858/3903/965/160364/5724/4973/8514/6616/53831/3916/55004/79792/226/22918/6813/527/8673/978/8655/945/1604/10288/102/3687/79930/7077/11314/963/1118/2352/101/4317/84418/2495/374403
GO_POSITIVE_REGULATION_OF_CELL_ADHESION	GO_POSITIVE_REGULATION_OF_CELL_ADHESION	388	0.308108	1.39073	0.000158989	0.00350506	0.00292353	3331	tags=32%, list=18%, signal=27%	10076/11117/6281/3956/6288/3373/1307/857/29984/4092/8764/10673/3675/80005/91663/7070/10519/6366/3115/2303/64094/199/8784/6387/3553/3142/572/3133/54566/1948/1326/10630/9647/864/604/3678/8744/2113/6385/1435/301/55083/3135/3689/11078/55679/8915/972/7168/402/6423/8829/7409/56477/284/3383/283234/10272/1947/2199/3109/2316/285613/151887/3569/5724/5881/2056/3381/861/3280/284114/54518/29126/7124/55612/742…
GO_HAPTOGLOBIN_BINDING	GO_HAPTOGLOBIN_BINDING	10	0.870972	2.00678	0.000177985	0.00384813	0.00320969	468	tags=20%, list=3%, signal=19%	3043/3040
GO_MITOCHONDRIAL_ELECTRON_TRANSPORT_NADH_TO_UBIQUINONE	GO_MITOCHONDRIAL_ELECTRON_TRANSPORT_NADH_TO_UBIQUINONE	47	0.557508	1.89596	0.000179725	0.0038733	0.00323068	4839	tags=62%, list=26%, signal=45%	374291/4715/29103/4713/51103/11315/65018/4723/4700/51079/4712/23479/4728/4716/126328/4724/4702/4729/4726/4708/57017/4706/4695/4707/4709/4731/4717/4710/4718
GO_RESPIRATORY_ELECTRON_TRANSPORT_CHAIN	GO_RESPIRATORY_ELECTRON_TRANSPORT_CHAIN	100	0.449917	1.70644	0.000182025	0.00391034	0.00326157	3895	tags=50%, list=21%, signal=40%	1537/1345/84701/1351/374291/4715/29103/10975/4713/51103/11315/790955/1327/2819/7384/65018/6390/4723/4700/7381/1349/51079/1340/29796/4712/1337/23479/4728/79751/2108/4716/126328/4724/7386/2109/4702/10891/4729/84883/4726/91942/1329/9377/4708/57017/4706/27089/4695/1350/4707
GO_FEMALE_PREGNANCY	GO_FEMALE_PREGNANCY	186	0.370513	1.53885	0.000194438	0.00414792	0.00345974	2655	tags=26%, list=15%, signal=22%	3726/8061/4318/2353/183/2354/2706/8614/7056/1307/3490/4316/3675/4313/5228/3553/7076/6159/85360/7043/3678/23780/682/2113/1508/10266/3297/133/1312/2697/3620/2099/5066/5744/51738/1594/2056/8398/5241/6696/2796/5740/54361/2057/84868/1394/340784/639
GO_SPROUTING_ANGIOGENESIS	GO_SPROUTING_ANGIOGENESIS	110	0.425579	1.65684	0.0002184	0.004618	0.00385183	2823	tags=38%, list=15%, signal=32%	441478/9314/3164/9982/10519/161198/7424/2303/29775/5228/10365/54567/6915/1948/187/27286/94/7423/3678/301/6271/10266/2246/10000/8829/284/57381/90993/1969/51738/6722/2324/2321/11082/7422/79812/3791/185/5315/4017/652/1960
GO_BLOOD_MICROPARTICLE	GO_BLOOD_MICROPARTICLE	111	0.431056	1.67747	0.000226467	0.00475864	0.00396914	2437	tags=25%, list=13%, signal=22%	183/7040/348/3043/718/5627/713/3040/710/2934/714/2040/72/721/3848/3303/3075/3310/8542/213/715/2/2022/2162/23549/720/8547/3306
GO_CHEMOATTRACTANT_ACTIVITY	GO_CHEMOATTRACTANT_ACTIVITY	36	0.618829	1.96048	0.000238585	0.00497591	0.00415036	2857	tags=42%, list=16%, signal=35%	3958/4282/5155/6288/6348/6289/7424/5228/7423/1673/3082/7422/10457/652/2252
GO_STRUCTURAL_CONSTITUENT_OF_CYTOSKELETON	GO_STRUCTURAL_CONSTITUENT_OF_CYTOSKELETON	101	0.461875	1.75502	0.000252516	0.00522437	0.00435759	988	tags=19%, list=5%, signal=18%	3861/3853/3852/3868/3872/7277/375790/10095/1674/3880/5339/3866/81569/54566/10174/23136/23336/10093/50853
GO_LYMPHOCYTE_MIGRATION	GO_LYMPHOCYTE_MIGRATION	110	0.422278	1.64399	0.000264296	0.00545131	0.00454688	3945	tags=42%, list=22%, signal=33%	2621/9547/414062/6288/9048/7499/8764/6348/1893/6361/6366/199/5293/6387/4267/6278/124976/387695/11035/3383/9023/6367/80024/6351/4345/284114/58191/6370/58494/6368/1901/6793/102/23143/6373/7535/2625/6369/101/2833/2185/7474/6375/1880/387/10344
GO_REGULATION_OF_EXTRACELLULAR_MATRIX_ORGANIZATION	GO_REGULATION_OF_EXTRACELLULAR_MATRIX_ORGANIZATION	36	0.616153	1.952	0.000265658	0.00546265	0.00455634	1949	tags=47%, list=11%, signal=42%	11117/183/7040/1471/6624/10630/165/150356/2113/4921/2191/5925/6939/84168/4035/3569/28984
GO_SMALL_RIBOSOMAL_SUBUNIT	GO_SMALL_RIBOSOMAL_SUBUNIT	71	0.492273	1.77232	0.000274313	0.0056164	0.00468458	4004	tags=49%, list=22%, signal=39%	6209/3040/3921/64951/6218/6207/6228/6203/28957/51116/6223/51065/65993/6227/10240/6235/92259/64963/6187/6194/6202/6191/6188/6224/6217/6204/6210/6234/6230/6231/6183/28973/64968/7311/6208
GO_HUMORAL_IMMUNE_RESPONSE	GO_HUMORAL_IMMUNE_RESPONSE	239	0.346891	1.49216	0.000274806	0.0056164	0.00468458	3917	tags=30%, list=21%, signal=24%	3853/3934/6590/5919/712/10417/54209/5266/718/1675/5627/713/717/710/3553/5967/714/3133/3119/5699/6156/721/7942/6278/124976/602/3848/5473/6039/6223/11326/5646/3075/1673/3569/715/28984/2/8398/7124/719/720/140823/8547/3543/975/1511/566/2821/1113/128822/1604/10148/57829/100423062/25818/6373/5320/732/54210/2625/5452/716/29760/5196/728/3110/4851/2208/6374/1880
GO_POSITIVE_REGULATION_OF_ALCOHOL_BIOSYNTHETIC_PROCESS	GO_POSITIVE_REGULATION_OF_ALCOHOL_BIOSYNTHETIC_PROCESS	25	0.689343	2.00681	0.000277825	0.00564379	0.00470743	2952	tags=48%, list=16%, signal=40%	3553/5031/2246/3269/5724/117/7124/54361/654/5745/6720/9619
GO_POSITIVE_REGULATION_OF_REACTIVE_OXYGEN_SPECIES_METABOLIC_PROCESS	GO_POSITIVE_REGULATION_OF_REACTIVE_OXYGEN_SPECIES_METABOLIC_PROCESS	92	0.450733	1.69356	0.000283439	0.00573829	0.00478625	1524	tags=26%, list=8%, signal=24%	706/445/183/7040/5155/9314/5159/3043/1647/7305/199/1535/3553/10365/1906/90527/3689/5873/2950/11315/80149/5580/11035/3383
GO_RESPONSE_TO_PURINE_CONTAINING_COMPOUND	GO_RESPONSE_TO_PURINE_CONTAINING_COMPOUND	150	0.379955	1.53488	0.000288166	0.00576675	0.00480999	3935	tags=39%, list=22%, signal=31%	3726/8061/445/2353/53905/2354/1843/6382/374/7056/3553/5029/358/3725/5728/218/7226/682/5031/5179/2819/4327/1036/7425/65010/1277/5138/5798/51763/5724/610/5322/677/4724/6720/5027/5970/10891/5105/10411/2889/65985/2946/10060/5032/50506/10518/133522/1811/1609/3727/2185/6528/6529/6263/5025/9370/5026
GO_REGULATION_OF_SYSTEMIC_ARTERIAL_BLOOD_PRESSURE_MEDIATED_BY_A_CHEMICAL_SIGNAL	GO_REGULATION_OF_SYSTEMIC_ARTERIAL_BLOOD_PRESSURE_MEDIATED_BY_A_CHEMICAL_SIGNAL	49	0.55037	1.87751	0.000296396	0.00589635	0.00491809	4320	tags=53%, list=24%, signal=41%	183/4311/1535/1906/4846/1066/1889/7168/1359/2149/6648/154/6518/147/56670/185/146/2702/1511/5021/554/552/387/2028/3291/81285
GO_REGULATION_OF_SYSTEMIC_ARTERIAL_BLOOD_PRESSURE	GO_REGULATION_OF_SYSTEMIC_ARTERIAL_BLOOD_PRESSURE	92	0.450175	1.69146	0.000301016	0.00595303	0.00496536	4548	tags=50%, list=25%, signal=38%	2621/183/5155/4311/1535/1906/10631/170690/4846/9424/1066/1889/133/7168/2697/1359/2149/6648/154/5331/6518/147/56670/185/146/2702/1511/89797/5800/5021/10391/3817/66002/7026/554/552/387/7137/2028/4879/3291/81285/354/10159/1813/9283
GO_POSITIVE_REGULATION_OF_MYELOID_LEUKOCYTE_DIFFERENTIATION	GO_POSITIVE_REGULATION_OF_MYELOID_LEUKOCYTE_DIFFERENTIATION	56	0.529143	1.8517	0.000307076	0.00605507	0.00505047	3045	tags=45%, list=17%, signal=37%	2353/7040/7071/146433/7305/54209/2242/3725/8111/1435/972/81501/5925/3059/133308/5457/4920/861/7124/677/56998/920/8600/54997/169200
GO_REGULATION_OF_MONOCYTE_DIFFERENTIATION	GO_REGULATION_OF_MONOCYTE_DIFFERENTIATION	19	0.742464	1.99269	0.000333724	0.00652315	0.00544089	2677	tags=74%, list=15%, signal=63%	146433/2242/3725/4609/8111/3204/1435/972/81501/3635/677/56998/3665/920
GO_MYELOID_LEUKOCYTE_DIFFERENTIATION	GO_MYELOID_LEUKOCYTE_DIFFERENTIATION	202	0.354921	1.49947	0.000336379	0.00653702	0.00545247	3622	tags=41%, list=20%, signal=33%	3726/4318/2353/7040/7071/302/6688/10312/6348/10202/146433/7305/54209/126014/56975/5293/2101/2242/3725/714/4609/116071/8111/135228/1436/3204/6988/2207/1435/55509/284266/3624/972/81501/10538/10234/9935/5925/3059/133308/10272/4627/1050/1969/5457/4920/3635/861/10537/7124/1437/4055/7422/8451/4495/9607/28962/677/1440/56998/975/3665/920/8600/2200/652/4067/54997/11006/169200/10859/128506/84522/5153/13352…
GO_REGULATION_OF_TUBE_SIZE	GO_REGULATION_OF_TUBE_SIZE	137	0.403326	1.60131	0.000342984	0.00664488	0.00554243	2503	tags=28%, list=14%, signal=25%	183/59/2053/857/348/80005/3779/2303/2876/5029/5797/1909/1906/6915/136/3363/4846/3741/1889/133/3352/2730/2697/3269/3383/3672/5592/1311/5724/2149/150/8398/6648/154/147/185/146/3792/2702
GO_POSITIVE_REGULATION_OF_CHEMOTAXIS	GO_POSITIVE_REGULATION_OF_CHEMOTAXIS	132	0.406542	1.61249	0.000343905	0.00664488	0.00554243	2788	tags=32%, list=15%, signal=27%	57402/2621/9547/7040/5155/9048/5919/5159/6348/5054/3315/54209/5880/7424/6366/64094/199/6387/5228/1906/59341/9647/7423/1435/6278/972/8829/1240/3569/2155/6351/284114/63940/719/7422/3791/56670/10488/2152/566/1901/3673
GO_PEPTIDE_ANTIGEN_BINDING	GO_PEPTIDE_ANTIGEN_BINDING	19	0.741979	1.99139	0.000352437	0.00679023	0.00566366	3036	tags=68%, list=17%, signal=57%	3134/3115/3123/3133/3119/3135/6890/3117/3122/3113/23428/3127/30835
GO_REGULATION_OF_VASCULATURE_DEVELOPMENT	GO_REGULATION_OF_VASCULATURE_DEVELOPMENT	305	0.320764	1.40372	0.000354124	0.00680323	0.00567451	2336	tags=29%, list=13%, signal=25%	11117/6237/183/5155/9314/3373/1512/7122/1634/5054/9982/10519/1893/3315/7424/718/2303/64094/29775/5228/3553/51330/10365/5797/358/6786/126393/54567/6915/6050/1948/187/4846/27286/94/8038/7423/3678/2113/301/6271/3135/8710/3689/10266/7075/3848/5176/3397/306/133/23129/1116/2246/80149/1958/5371/23166/8742/6423/10000/1944/641700/8829/4772/3202/57381/90993/1969/51738/947/51548/3569/28984/861/6648/2321/202…
GO_SUPEROXIDE_ANION_GENERATION	GO_SUPEROXIDE_ANION_GENERATION	35	0.602534	1.88524	0.000361484	0.00690517	0.00575954	1340	tags=31%, list=7%, signal=29%	54/53905/183/7040/7305/1535/1906/3689/10811/2950/5580
GO_OXYGEN_TRANSPORT	GO_OXYGEN_TRANSPORT	15	0.772058	1.95052	0.000362814	0.00690707	0.00576112	644	tags=27%, list=4%, signal=26%	3043/114757/3040/4609
GO_CHONDROCYTE_DIFFERENTIATION	GO_CHONDROCYTE_DIFFERENTIATION	116	0.412104	1.60943	0.000385373	0.00721796	0.00602042	2826	tags=37%, list=15%, signal=32%	6591/4488/1292/1291/7040/302/1294/116039/7045/176/1893/130497/64856/4094/10736/1293/94/864/81029/150356/4054/85301/4148/7483/6423/6474/7476/5744/1311/85477/861/650/5915/50515/5916/392255/654/642658/5745/4017/1301/652/81792
GO_OXIDATIVE_PHOSPHORYLATION	GO_OXIDATIVE_PHOSPHORYLATION	109	0.43176	1.67338	0.000414303	0.00767431	0.00640106	3921	tags=46%, list=21%, signal=36%	1346/400916/1537/26471/1345/84701/1351/374291/4715/215/29103/10975/4713/51103/11315/790955/1327/7384/65018/4723/4700/7381/1347/1349/51079/1340/29796/4712/1337/6834/23479/4728/4716/126328/4724/7386/4702/4729/51085/4726/1329/9377/4708/57017/4706/27089/4695/1350/4707/387
GO_ERK1_AND_ERK2_CASCADE	GO_ERK1_AND_ERK2_CASCADE	289	0.325872	1.42848	0.000416288	0.00768989	0.00641406	3945	tags=35%, list=22%, signal=28%	2621/4282/55450/11117/6237/183/7040/5155/1843/414062/9314/5159/348/1512/57007/6348/10519/467/54209/10268/2633/6361/6366/3553/3725/4609/1652/10636/59341/5154/1436/26291/5728/6278/5605/5031/2950/3265/1116/8685/8482/972/8829/5734/284/3383/1969/4035/6367/2324/6351/2056/2149/650/27020/2771/7124/5322/1445/10457/3791/677/5151/84868/6370/1846/920/8600/6368/652/6098/948/4067/5021/409/2889/7078/6464/54550/…
GO_REGULATION_OF_INFLAMMATORY_RESPONSE	GO_REGULATION_OF_INFLAMMATORY_RESPONSE	326	0.317891	1.40228	0.000417867	0.00769791	0.00642075	3153	tags=29%, list=17%, signal=25%	2161/4318/54/2167/183/9314/6288/348/6348/5054/26471/54209/7791/718/84818/2876/3055/3553/5008/1652/2879/3133/215/81858/90527/115362/59341/27190/136/90865/604/2207/2113/301/79626/3848/7850/5176/2950/11315/80149/8717/8482/255877/388125/7130/6223/5580/3620/5734/2099/5925/4598/5138/22861/1050/51738/4907/3569/284207/56833/4345/63940/4314/2867/3082/7124/5733/5740/56670/148022/695/185/8673/3606/4258/975/…
GO_HORMONE_ACTIVITY	GO_HORMONE_ACTIVITY	115	0.411582	1.60435	0.000423165	0.00775303	0.00646673	4146	tags=29%, list=23%, signal=22%	79006/183/8614/4828/1906/5179/133/2922/3625/3624/7425/90226/1114/57817/5744/51738/284207/2056/2796/9607/6370/2200/2520/6343/5368/3972/11172/347148/9370/6750/4879/4922/7349
GO_I_BAND	GO_I_BAND	139	0.393535	1.57404	0.000438301	0.00800852	0.00667982	3361	tags=25%, list=18%, signal=21%	113146/10398/9260/57158/1674/3880/64236/10529/3315/87/114907/3856/8572/6271/100820829/2274/3741/10273/2316/26287/9124/1465/226/2318/2275/8470/493/775/9531/1410/91624/6607/84676/4634/5239
GO_REGULATION_OF_EPITHELIAL_CELL_MIGRATION	GO_REGULATION_OF_EPITHELIAL_CELL_MIGRATION	210	0.350172	1.48192	0.000444499	0.00807787	0.00673767	1579	tags=21%, list=9%, signal=19%	4318/183/7040/5155/9314/8828/3373/348/1512/1634/3675/80005/9982/10519/3315/7424/2303/64094/29775/5797/3725/54567/1906/6915/54566/9564/4846/27286/94/9647/1839/5728/2113/301/5176/306/2246/80149/10000/8829/284/9922/57381/7476
GO_REGULATION_OF_CELL_SUBSTRATE_ADHESION	GO_REGULATION_OF_CELL_SUBSTRATE_ADHESION	198	0.354956	1.49123	0.000446637	0.00807838	0.0067381	2336	tags=27%, list=13%, signal=24%	11117/6281/3956/4321/1307/29984/5054/3675/5328/80005/91663/7070/10519/182/6695/5880/2633/6366/64094/1613/10631/10630/11170/94/9647/3204/8751/5728/604/3678/10395/6385/1435/4323/11078/55679/402/8829/1277/56477/6548/2199/2316/285613/4035/151887/5881/2042/395/55612/7422/3791/54361
GO_PLATELET_ALPHA_GRANULE_LUMEN	GO_PLATELET_ALPHA_GRANULE_LUMEN	66	0.492416	1.76292	0.00044693	0.00807838	0.0067381	2267	tags=39%, list=12%, signal=35%	2621/3671/7040/5155/5054/7424/87/1675/5627/51368/710/7076/83706/5154/7043/7423/5473/5265/54863/213/7450/2/2162/3082/226/7422
GO_POSITIVE_REGULATION_OF_EPITHELIAL_CELL_MIGRATION	GO_POSITIVE_REGULATION_OF_EPITHELIAL_CELL_MIGRATION	135	0.398448	1.5827	0.000450048	0.00811293	0.00676691	1579	tags=25%, list=9%, signal=23%	4318/183/7040/5155/8828/3373/1512/3675/80005/9982/10519/3315/7424/2303/64094/3725/1906/54566/9564/4846/27286/9647/1839/2113/301/306/2246/80149/10000/8829/284/9922/57381/7476
GO_DEFENSE_RESPONSE_TO_GRAM_POSITIVE_BACTERIUM	GO_DEFENSE_RESPONSE_TO_GRAM_POSITIVE_BACTERIUM	92	0.442748	1.66355	0.000472525	0.00845015	0.00704818	3058	tags=26%, list=17%, signal=22%	3853/54/5919/8764/2634/3133/115361/6039/163351/387695/1969/284297/1673/3569/353142/7124/79792/140823/2268/84868/1511/1113/948/5027
GO_PLATELET_ALPHA_GRANULE	GO_PLATELET_ALPHA_GRANULE	90	0.438931	1.65086	0.000484594	0.00859888	0.00717224	2391	tags=33%, list=13%, signal=29%	2621/3671/7040/5155/5054/7424/87/1675/5627/51368/710/7076/83706/5154/135228/7043/7423/5473/5265/54863/5175/213/7450/2/2162/3082/51706/226/7422/928
GO_INTEGRIN_BINDING	GO_INTEGRIN_BINDING	128	0.403294	1.59069	0.000492739	0.00869601	0.00725325	2391	tags=32%, list=13%, signal=28%	3914/11117/1307/7045/3675/8425/7070/87/4240/6387/3553/83706/7106/1289/7087/8751/3678/977/1281/4323/83700/3689/2246/9636/8482/6423/3913/2191/3383/3909/4627/3693/1311/3381/7450/11082/6696/10457/3791/63923/928
GO_TRANSLATIONAL_INITIATION	GO_TRANSLATIONAL_INITIATION	190	0.355946	1.48729	0.000510065	0.00893146	0.00744964	3125	tags=37%, list=17%, signal=31%	6209/3315/1978/6142/11224/8637/9045/6159/6132/3921/6137/6161/6176/9811/6156/6122/6218/6207/8669/6135/6228/6146/6129/6203/6223/6138/8664/6124/3692/10289/6175/25873/23645/6130/468/6141/27335/3646/6227/8667/6164/6125/100127983/6158/440275/6235/6133/6128/7124/6168/6181/6187/6194/6171/6202/4736/8668/6191/6144/6155/6188/6224/6152/6217/6204/6136/6210/6234/6230/6231
GO_REGULATION_OF_CELL_CELL_ADHESION	GO_REGULATION_OF_CELL_CELL_ADHESION	392	0.300613	1.36239	0.000528592	0.00918411	0.00766037	3331	tags=31%, list=18%, signal=26%	10076/53827/441478/3958/6591/445/3956/80139/7040/9314/857/4092/8764/10673/91663/7070/182/6366/3115/199/6387/2615/3553/3142/83706/572/3133/1948/1326/10630/59341/4155/9647/864/604/8744/2113/6385/301/55083/79626/3135/3689/80149/8915/972/3659/5580/11326/3620/7409/56477/3383/283234/10272/1947/3109/5621/5592/3569/5724/2056/28984/861/3280/650/266727/29126/7124/2796/7422/1445/10457/912/3113/54361/654/359…
GO_CARBOHYDRATE_BINDING	GO_CARBOHYDRATE_BINDING	260	0.326859	1.42212	0.000556283	0.0095909	0.00799967	2277	tags=22%, list=12%, signal=19%	26232/3958/56241/59271/6320/3956/176/161198/5310/3957/5967/5214/54681/3123/85329/50856/7123/9976/10536/2203/9902/721/6652/1272/3101/682/117248/64129/282969/3848/6515/283208/143903/1116/57124/29988/26270/56851/5066/4885/346689/947/10462/160364/4973/6614/3122/2022/5507/2595/2585/5211/971/6518/226/22918
GO_LUMENAL_SIDE_OF_ENDOPLASMIC_RETICULUM_MEMBRANE	GO_LUMENAL_SIDE_OF_ENDOPLASMIC_RETICULUM_MEMBRANE	23	0.689861	1.97989	0.00064535	0.0110135	0.00918628	3644	tags=74%, list=20%, signal=59%	3134/3115/3123/3133/3119/3135/972/3117/3122/121665/84888/3113/56928/3127/3118/3120/6892
GO_VACUOLAR_LUMEN	GO_VACUOLAR_LUMEN	166	0.355937	1.45744	0.000695991	0.0118178	0.00985709	2791	tags=30%, list=15%, signal=26%	93100/2817/302/375790/5549/6382/3373/1513/633/5159/1634/176/4060/6317/1727/718/410/29952/2512/10577/4969/427/6385/6278/1508/3425/1509/972/2760/5580/6383/80142/54472/387921/10082/5476/8722/1464/8635/10383/3614/5275/3988/3073/1511/2517/10437/55313/566/3423
GO_NEGATIVE_REGULATION_OF_CYTOKINE_PRODUCTION	GO_NEGATIVE_REGULATION_OF_CYTOKINE_PRODUCTION	262	0.326162	1.41338	0.000701487	0.0118811	0.00990991	2388	tags=23%, list=13%, signal=20%	2621/706/54/7293/7538/80772/7040/9314/3134/8986/4092/7305/54209/5045/2633/2615/10365/50856/215/7043/90865/604/301/3297/79594/602/7850/2950/3625/3624/80149/23005/9636/5371/11326/3620/5734/84166/284/1240/1969/51738/5621/947/284297/3569/28984/3635/307/4345/27020/3082/29126/7124/558/1445/10457/59307/695
GO_RESPONSE_TO_TUMOR_NECROSIS_FACTOR	GO_RESPONSE_TO_TUMOR_NECROSIS_FACTOR	292	0.317489	1.39426	0.000709401	0.011985	0.00999653	3192	tags=28%, list=17%, signal=24%	2621/3934/7293/2167/7538/445/9076/414062/2635/3373/8764/10673/6348/2634/10519/2633/6361/6366/1535/8784/51330/10365/5696/83483/5698/1906/2687/81858/3856/2021/10631/5699/427/8744/4050/929/3303/2950/1116/80149/8717/2819/81501/8742/1277/9447/3383/57817/5715/1050/51763/6367/965/6351/8372/84888/608/10537/7124/4055/5695/58191/677/56928/3875/6370/8600/6188/6368/8718/81792/3037/55022/4792/102/5970/10891/9…
GO_ADAPTIVE_IMMUNE_RESPONSE	GO_ADAPTIVE_IMMUNE_RESPONSE	397	0.296301	1.33847	0.000722408	0.0121437	0.0101289	3864	tags=34%, list=21%, signal=27%	7040/567/3134/712/10312/4092/1512/8764/10673/7264/182/6891/718/3115/713/81622/5293/717/2217/710/3553/3142/714/3123/974/127544/50856/3133/6097/3119/721/7942/90865/604/2207/301/83700/3135/5817/602/10039/5873/3265/80149/8915/972/3659/7462/6890/5580/10538/3117/3108/11035/3383/57823/3004/3903/7454/3109/3569/715/10462/10068/27240/3122/3635/440275/80758/608/29126/7124/2067/720/1445/912/3113/3594/695/942…
GO_DENDRITIC_CELL_DIFFERENTIATION	GO_DENDRITIC_CELL_DIFFERENTIATION	41	0.561927	1.8335	0.000834226	0.0137822	0.0114956	2263	tags=39%, list=12%, signal=34%	2621/6688/10202/54209/28959/116071/7226/55365/55509/3135/81501/10538/10537/558/1437/4055
GO_REGULATION_OF_ENDOTHELIAL_CELL_MIGRATION	GO_REGULATION_OF_ENDOTHELIAL_CELL_MIGRATION	148	0.37018	1.49093	0.000839929	0.0138424	0.0115458	1949	tags=24%, list=11%, signal=22%	183/7040/5155/9314/8828/348/1634/9982/10519/3315/7424/2303/64094/29775/5797/54567/1906/6915/9564/4846/27286/94/2113/301/5176/306/2246/80149/10000/8829/284/57381/7476/1969/2324/28984
GO_REGULATION_OF_POSITIVE_CHEMOTAXIS	GO_REGULATION_OF_POSITIVE_CHEMOTAXIS	25	0.660672	1.92335	0.000861882	0.0141005	0.0117611	2788	tags=48%, list=15%, signal=41%	9048/7424/6387/5228/7423/2155/7422/3791/2152/566/1901/3673
GO_REGULATION_OF_CELL_JUNCTION_ASSEMBLY	GO_REGULATION_OF_CELL_JUNCTION_ASSEMBLY	92	0.429171	1.61254	0.000878798	0.0142044	0.0118478	2336	tags=34%, list=13%, signal=30%	6591/6281/9076/183/1307/857/29984/7122/7070/1613/3553/11170/94/9647/5728/10395/6385/4323/6615/2697/8829/6548/1969/4035/2042/861/395/7124/7422/3791/54361
GO_NEGATIVE_REGULATION_OF_RESPONSE_TO_WOUNDING	GO_NEGATIVE_REGULATION_OF_RESPONSE_TO_WOUNDING	87	0.439399	1.63042	0.000920515	0.014737	0.012292	2540	tags=32%, list=14%, signal=28%	2161/11202/302/5155/5055/7056/348/5054/5328/5627/5329/710/1906/5154/135228/4846/5728/3848/2697/5580/2191/947/5592/6696/83481/54361/928/5327
GO_RESPONSE_TO_ZINC_ION	GO_RESPONSE_TO_ZINC_ION	52	0.506378	1.74989	0.000925136	0.0147459	0.0122994	1818	tags=25%, list=10%, signal=23%	3861/4493/706/4502/445/4501/5728/91252/210/7054/57817/5350/1396
GO_SPECIFIC_GRANULE_MEMBRANE	GO_SPECIFIC_GRANULE_MEMBRANE	89	0.432673	1.61767	0.000925458	0.0147459	0.0122994	2953	tags=35%, list=16%, signal=29%	10555/64114/5328/1535/5329/2040/8694/221/10043/7226/3689/6515/79895/64386/3903/160364/4973/8514/6616/53831/6518/55004/719/22918/51382/57153/8673/6793/945/948/102
GO_CHEMOKINE_ACTIVITY	GO_CHEMOKINE_ACTIVITY	47	0.5141	1.74833	0.000935314	0.0148327	0.0123718	3945	tags=43%, list=22%, signal=33%	9547/414062/6348/6361/6366/6387/5473/387695/56477/6367/6351/58191/6370/6368/6373/6369/5196/6375/6374/10344
GO_POSITIVE_REGULATION_OF_LEUKOCYTE_DIFFERENTIATION	GO_POSITIVE_REGULATION_OF_LEUKOCYTE_DIFFERENTIATION	146	0.382442	1.53301	0.000944697	0.0149462	0.0124665	3502	tags=38%, list=19%, signal=31%	2621/2353/7040/7071/146433/7305/54209/2242/3142/3725/572/8111/864/604/8744/1435/301/4323/3135/972/81501/5925/3059/133308/55795/5457/4920/3635/861/7124/558/3594/695/942/677/56998/3606/51043/920/8600/84807/1960/10288/8808/54997/11006/169200/100/2323/114548/128506/7535/133522/2625/101
GO_INTERMEDIATE_FILAMENT_BASED_PROCESS	GO_INTERMEDIATE_FILAMENT_BASED_PROCESS	50	0.514234	1.77389	0.000949032	0.0149796	0.0124943	324	tags=14%, list=2%, signal=14%	3861/3868/5317/3872/1674/286887/5339
GO_PROTON_TRANSMEMBRANE_TRANSPORT	GO_PROTON_TRANSMEMBRANE_TRANSPORT	129	0.387022	1.51996	0.000960601	0.0151267	0.012617	3584	tags=37%, list=20%, signal=30%	1346/400916/84419/10312/1537/1345/84701/6564/11261/56901/1351/9550/374291/525/113655/51296/11315/245972/1327/29988/170712/55002/133308/1347/8992/6548/1349/1340/11182/1337/529/6834/9605/527/51382/526/533/56606/54997/528/1183/23315/10063/7291/1329/9377/5250/92270
GO_CYTOKINE_RECEPTOR_BINDING	GO_CYTOKINE_RECEPTOR_BINDING	274	0.321701	1.40608	0.000975826	0.0152948	0.0127572	3466	tags=29%, list=19%, signal=24%	57402/9547/4282/7040/414062/64114/4092/10673/6348/1893/146433/7424/6361/6366/6387/5228/3553/5008/1652/7043/7423/3678/8744/1435/4050/9518/5473/3625/3624/8717/387695/4091/8742/56477/54472/7205/1673/3569/6367/6351/2056/650/2022/146722/9034/4803/7049/7124/1437/8835/7422/392255/654/3594/58191/10637/1440/3589/3606/6370/8600/6368/652/10572/7044/10148/1003/3557/970/3570/10464/7187/3552/6373/6464/10116/16…
GO_CELL_CELL_JUNCTION	GO_CELL_CELL_JUNCTION	473	0.28584	1.31859	0.00098895	0.0154644	0.0128987	2782	tags=24%, list=15%, signal=21%	1830/360/2709/5317/10076/2707/23650/11135/80115/1825/54587/10397/9076/9260/79652/302/2706/3801/126353/595/1307/1265/1674/10791/4092/7122/2701/7408/10804/91663/64236/182/57125/7791/87/51421/90952/6330/1308/5797/11187/79026/6624/54566/3856/9073/57863/59341/29766/23136/23336/225689/8751/8572/6282/3678/301/5605/83700/5817/51294/55679/6324/3741/10458/11315/2697/5580/7409/5348/57817/57449/794/5175/4627…
GO_ACTIN_FILAMENT	GO_ACTIN_FILAMENT	116	0.394676	1.54137	0.00103462	0.0160389	0.0133779	2192	tags=28%, list=12%, signal=25%	7169/9260/10634/126353/10804/64236/5880/84948/87/199/3055/23406/85377/1613/81569/57617/8572/5358/301/83700/7168/3059/6525/55970/7454/2316/254102/2017/5881/9124/395/9948/11344
GO_OXIDOREDUCTASE_ACTIVITY_ACTING_ON_A_HEME_GROUP_OF_DONORS	GO_OXIDOREDUCTASE_ACTIVITY_ACTING_ON_A_HEME_GROUP_OF_DONORS	24	0.668803	1.92279	0.00103541	0.0160389	0.0133779	2041	tags=54%, list=11%, signal=48%	1346/84419/1345/84701/56901/1351/1327/170712/1347/1349/1340/1337/6834
GO_REACTIVE_OXYGEN_SPECIES_BIOSYNTHETIC_PROCESS	GO_REACTIVE_OXYGEN_SPECIES_BIOSYNTHETIC_PROCESS	103	0.408629	1.55513	0.00104419	0.0161035	0.0134317	1233	tags=20%, list=7%, signal=19%	706/54/445/53905/183/9314/857/3043/6697/199/1535/3553/10365/1906/215/90527/4846/3689/5873/11315/80149
GO_NEGATIVE_REGULATION_OF_RESPONSE_TO_EXTERNAL_STIMULUS	GO_NEGATIVE_REGULATION_OF_RESPONSE_TO_EXTERNAL_STIMULUS	355	0.296713	1.32745	0.00108124	0.0166164	0.0138596	2433	tags=21%, list=13%, signal=19%	4681/2161/4282/6591/54/11202/302/79148/5654/5155/1843/9314/6288/4321/3134/5055/7056/348/1855/5054/5328/6318/199/5627/2876/5329/710/1652/1906/3133/215/81858/5154/135228/4846/5728/2113/79626/3135/79594/3848/7850/5176/2950/80149/23005/8482/7130/2697/6223/5580/11326/8829/5734/2191/5925/84166/4598/51738/947/4907/5592/284207/23513/2/56833/4345/6696/3082/83481/5740/54361/59307/9607/928/80031
GO_ELECTRON_TRANSFER_ACTIVITY	GO_ELECTRON_TRANSFER_ACTIVITY	106	0.413725	1.58584	0.00108239	0.0166164	0.0138596	3871	tags=45%, list=21%, signal=36%	1346/84419/7264/22977/1537/1345/1535/8574/84701/56901/1351/83442/10975/2877/9249/1327/7384/217/170712/3620/6390/7381/1347/80142/1349/1340/29796/1337/6834/2108/2745/4017/7386/2109/8608/4729/8974/84883/4726/91942/1329/9377/1728/1536/27089/653361/10587/1350
GO_CONNEXIN_COMPLEX	GO_CONNEXIN_COMPLEX	21	0.701353	1.96981	0.00116207	0.0177585	0.0148122	2743	tags=48%, list=15%, signal=41%	2709/2707/2706/2701/10804/2697/349149/127534/2702/2705
GO_COLLAGEN_TRIMER	GO_COLLAGEN_TRIMER	87	0.43318	1.60735	0.00117386	0.0178981	0.0149286	2431	tags=31%, list=13%, signal=27%	11117/1292/1291/80781/1294/712/1307/50509/1634/4060/713/1308/114904/714/1293/1289/1281/10882/85301/8685/1277/169044/1296/1278/84034/1300/8547
GO_ANCHORED_COMPONENT_OF_MEMBRANE	GO_ANCHORED_COMPONENT_OF_MEMBRANE	160	0.356905	1.45001	0.0011921	0.018094	0.0150921	2183	tags=22%, list=12%, signal=20%	10232/8581/27076/249/2817/4061/349667/7070/66004/2619/5329/135228/1272/81926/2350/929/4326/8482/130617/50863/338328/1944/4062/419/152330/64386/84966/54742/5621/4907/154064/10082/10942/8794/266727/353091
GO_RENAL_SYSTEM_VASCULATURE_DEVELOPMENT	GO_RENAL_SYSTEM_VASCULATURE_DEVELOPMENT	27	0.628509	1.8499	0.00124294	0.018666	0.0155692	3145	tags=56%, list=17%, signal=46%	59/5155/5159/2303/130497/8710/1958/8829/284/5175/947/3280/2828/652/3570
GO_REGULATION_OF_CYTOSOLIC_CALCIUM_ION_CONCENTRATION	GO_REGULATION_OF_CYTOSOLIC_CALCIUM_ION_CONCENTRATION	357	0.298523	1.33976	0.00124921	0.018666	0.0155692	2954	tags=23%, list=16%, signal=19%	22821/183/302/6288/10590/57158/857/113026/57007/6348/5333/7070/27112/10268/6366/1535/5310/2769/1909/80045/2151/4828/1906/6915/51024/187/59341/9651/53373/126306/79608/7226/5031/3741/5330/133/8996/2697/5371/5734/56477/2099/794/5739/1240/51738/9001/5621/4035/5350/80024/2056/2149/121665/8398/9034/27020/117/5331/719/5733/147/2826/4644/1193/2828/185/8698/146/2840/920/2905/5745/7225/1020/1901/493/775/94…
GO_POSITIVE_REGULATION_OF_RECEPTOR_BINDING	GO_POSITIVE_REGULATION_OF_RECEPTOR_BINDING	10	0.827048	1.90558	0.00127507	0.0188845	0.0157514	1461	tags=40%, list=8%, signal=37%	4318/302/567/8829
GO_SIDE_OF_MEMBRANE	GO_SIDE_OF_MEMBRANE	498	0.2743	1.26697	0.00130145	0.0192328	0.0160419	3196	tags=29%, list=17%, signal=25%	6277/5753/7293/22821/6382/3134/57007/8764/3675/858/349667/7070/161198/290/4240/3115/2791/6387/2769/3055/2217/2242/6769/3123/974/3133/4162/3119/3563/2767/135250/5728/79054/2207/2350/26119/3678/301/5605/929/100820829/3135/3689/1889/2159/57124/8482/972/1917/55068/9854/2760/338328/3117/7054/7036/3383/5175/2214/55847/84168/6340/3672/84966/55970/5621/94235/947/154064/118429/8514/6616/3122/121665/5476/6…
GO_APOPTOTIC_CELL_CLEARANCE	GO_APOPTOTIC_CELL_CLEARANCE	47	0.504767	1.71659	0.00131467	0.0193856	0.0161693	2984	tags=38%, list=16%, signal=32%	2621/7305/54209/5880/718/4240/717/721/391/8685/4035/55113/146722/558/720/8547/948/375033
GO_BLOOD_VESSEL_ENDOTHELIAL_CELL_MIGRATION	GO_BLOOD_VESSEL_ENDOTHELIAL_CELL_MIGRATION	109	0.407903	1.58092	0.00132313	0.0194312	0.0162074	2331	tags=31%, list=13%, signal=27%	54345/7040/5155/9314/348/3164/9982/10519/161198/3315/7424/2303/29775/2876/54567/6915/1948/4846/27286/94/2113/301/3397/10000/8829/284/57381/4627/1969/6722/28984/7422/79812/3791
GO_REGULATION_OF_ACTIN_FILAMENT_BASED_PROCESS	GO_REGULATION_OF_ACTIN_FILAMENT_BASED_PROCESS	362	0.290752	1.30333	0.00134588	0.0197162	0.0164451	2798	tags=28%, list=15%, signal=24%	171177/11135/80115/390/6281/10095/1265/857/148170/5159/29984/7408/389/91663/5880/6366/6387/90952/3055/29085/23406/2242/1613/643338/9620/9535/2934/832/51332/1906/6624/10174/10630/11170/29766/29767/5154/7043/1436/9647/10093/10395/7226/50853/6385/55845/284266/83700/5999/391/11078/55160/10458/3397/3265/7168/5580/256949/8829/5734/3059/3383/57381/5066/123720/4627/6548/7454/2316/822/4035/5350/7016/2017/…
GO_RESPONSE_TO_STEROID_HORMONE	GO_RESPONSE_TO_STEROID_HORMONE	378	0.294317	1.33404	0.00135909	0.0198664	0.0165703	2174	tags=19%, list=12%, signal=17%	4246/10076/4250/8061/706/7538/445/2353/249/9076/2354/7040/1843/6382/2706/374/595/857/3490/3164/7041/56937/1978/199/1535/2101/387758/358/572/1906/114907/26508/6097/11170/7043/51569/218/478/301/10266/2274/210/5176/2950/306/11315/133/1036/79039/7054/7477/3174/1277/2099/5925/3383/6898/5066/51341/3569/164091/5724/2056/6586/861/81606/2022/5241/6696/5915/7124
GO_POSITIVE_REGULATION_OF_STEROID_BIOSYNTHETIC_PROCESS	GO_POSITIVE_REGULATION_OF_STEROID_BIOSYNTHETIC_PROCESS	18	0.69654	1.86365	0.00139413	0.0202029	0.016851	3101	tags=56%, list=17%, signal=46%	3553/133/2246/7124/54361/654/6720/9619/10891/9572
GO_EPITHELIAL_CELL_PROLIFERATION	GO_EPITHELIAL_CELL_PROLIFERATION	376	0.293101	1.32825	0.00142186	0.0205163	0.0171124	2870	tags=30%, list=16%, signal=26%	5268/441478/2810/6591/195814/7538/11202/9076/80139/51162/7040/5654/5155/116039/4321/567/8828/3373/374/3851/595/857/348/3164/858/26471/9982/1893/7424/1535/6387/130497/2876/5228/5967/5797/3664/3725/4609/572/54567/1948/187/135228/94/7051/7423/864/5728/4323/5605/55679/2069/5176/10468/3397/3265/2246/283/2697/9241/57152/8742/6195/6423/10000/8829/2191/2099/5925/3202/51092/3486/7476/5798/1969/51738/1296/…
GO_REGULATION_OF_METAL_ION_TRANSPORT	GO_REGULATION_OF_METAL_ION_TRANSPORT	376	0.292922	1.32744	0.00142186	0.0205163	0.0171124	3356	tags=28%, list=18%, signal=23%	5349/53827/3958/3755/706/183/302/5155/567/8614/57158/857/5159/6348/7070/54209/10268/3779/1535/6387/130497/11261/6330/4638/6769/6786/2040/79026/187/3757/4846/1272/126306/51393/5728/6236/6271/5999/6324/5031/3741/2697/5371/5348/3383/57817/468/6548/2316/9001/5621/5350/51763/80024/8514/6351/29763/2056/2149/150/8398/23479/154/10681/117/2771/388591/255738/4644/1193/10008/3306/3792/2745/30818/482/1394/24…
GO_MONONUCLEAR_CELL_DIFFERENTIATION	GO_MONONUCLEAR_CELL_DIFFERENTIATION	35	0.562885	1.76119	0.00146025	0.0210251	0.0175369	2794	tags=57%, list=15%, signal=49%	146433/2242/3725/4609/8111/1436/3204/1435/972/81501/4627/3635/1437/7422/4495/677/56998/3665/920/652
GO_PHOSPHOLIPASE_C_ACTIVATING_G_PROTEIN_COUPLED_RECEPTOR_SIGNALING_PATHWAY	GO_PHOSPHOLIPASE_C_ACTIVATING_G_PROTEIN_COUPLED_RECEPTOR_SIGNALING_PATHWAY	107	0.397746	1.52614	0.00151096	0.0216281	0.0180398	2863	tags=25%, list=16%, signal=21%	183/4883/2769/5029/80045/2151/1906/2767/5031/2922/3269/2099/1240/2149/150/23620/719/5733/147/2828/185/146/2840/5745/1901/1113/4985
GO_PROTEIN_TARGETING	GO_PROTEIN_TARGETING	417	0.284769	1.3002	0.00151178	0.0216281	0.0180398	3161	tags=30%, list=17%, signal=25%	706/83597/2053/29984/6209/26517/10519/5880/6142/11224/11261/85377/30/293/9045/6159/6132/3921/6137/10755/2040/6161/1384/6176/5372/51024/6156/6122/6218/29103/401647/6207/9145/54741/8310/6135/6228/3689/118424/5873/6146/6129/3265/6203/54543/130617/6223/6138/6124/51201/65018/6175/25873/6130/6141/6727/4053/6227/9001/5621/51079/131474/3155/6164/6125/51763/10452/9049/84885/6449/6158/6235/6133/79720/84243…
GO_REGULATION_OF_NAD_P_H_OXIDASE_ACTIVITY	GO_REGULATION_OF_NAD_P_H_OXIDASE_ACTIVITY	11	0.810171	1.9254	0.00153183	0.0218685	0.0182403	2445	tags=55%, list=13%, signal=47%	183/1535/11315/56833/2771/185
GO_NEGATIVE_REGULATION_OF_EXTRACELLULAR_MATRIX_ORGANIZATION	GO_NEGATIVE_REGULATION_OF_EXTRACELLULAR_MATRIX_ORGANIZATION	11	0.81004	1.92509	0.00155758	0.0220024	0.018352	1612	tags=55%, list=9%, signal=50%	11117/7040/1471/150356/2191/84168
GO_REGULATION_OF_REACTIVE_OXYGEN_SPECIES_BIOSYNTHETIC_PROCESS	GO_REGULATION_OF_REACTIVE_OXYGEN_SPECIES_BIOSYNTHETIC_PROCESS	83	0.436595	1.60561	0.00162071	0.0227508	0.0189762	1751	tags=24%, list=10%, signal=22%	706/54/445/183/9314/857/3043/199/1535/3553/10365/1906/215/90527/3689/5873/11315/80149/3383/947
GO_MITOCHONDRIAL_PROTEIN_COMPLEX	GO_MITOCHONDRIAL_PROTEIN_COMPLEX	220	0.329161	1.40492	0.00162559	0.0227718	0.0189938	3827	tags=35%, list=21%, signal=28%	400916/84419/26517/1537/91689/84701/56901/293/374291/64981/4715/64975/64951/116541/29103/4713/51103/55052/790955/1327/54543/28957/51116/7384/79135/6390/4723/4700/7381/65993/10240/51079/8801/29796/6182/10452/4712/1337/92259/219927/64963/78988/56993/4728/140823/80273/26519/4716/28998/126328/4724/7386/4702/23203/51073/401505/51025/4729/51264/5428/4726/593/10245/6183/9377/4708/5442/28973/29074/64928/…
GO_GAP_JUNCTION	GO_GAP_JUNCTION	31	0.601563	1.82601	0.00166644	0.023199	0.01935	2743	tags=39%, list=15%, signal=33%	2709/2707/2706/2701/10804/2697/794/349149/27352/127534/2702/2705
GO_DIVALENT_INORGANIC_CATION_TRANSPORT	GO_DIVALENT_INORGANIC_CATION_TRANSPORT	476	0.275685	1.2642	0.00167394	0.0232553	0.019397	3242	tags=22%, list=18%, signal=19%	3958/2621/706/10267/22821/183/302/5155/8614/57158/857/113026/5159/6348/2701/5333/7070/27112/10268/6366/91689/55630/1535/6387/5310/4638/6769/6786/79026/187/59341/9651/4846/53373/126306/51393/6520/79054/6236/7226/6271/10266/5999/91252/5031/5330/8996/2697/5371/348938/3383/5138/6548/7178/9001/5621/5350/51763/10686/80024/6351/29763/1594/54836/2056/2149/79815/150/8398/152519/27092/10681/117/2771/5331/9…
GO_POSITIVE_REGULATION_OF_INFLAMMATORY_RESPONSE	GO_POSITIVE_REGULATION_OF_INFLAMMATORY_RESPONSE	133	0.369543	1.46682	0.00170772	0.023627	0.019707	2792	tags=33%, list=15%, signal=28%	2161/2167/183/6348/5054/26471/54209/718/84818/3553/5008/1652/3133/115362/59341/27190/136/90865/2207/2113/11315/8717/388125/6223/3620/5734/5138/1050/3569/63940/2867/7124/5733/56670/148022/695/185/8673/3606/4258/975/8600/3673/923
GO_ESTABLISHMENT_OF_PROTEIN_LOCALIZATION_TO_MEMBRANE	GO_ESTABLISHMENT_OF_PROTEIN_LOCALIZATION_TO_MEMBRANE	313	0.298443	1.31447	0.00175599	0.0241952	0.020181	3072	tags=32%, list=17%, signal=27%	2810/83597/10791/6209/26517/10519/6142/11224/11261/85377/9045/6159/6132/3921/6137/572/2040/6161/160622/6176/51024/6156/10815/6122/6218/401647/6207/10139/6135/6228/3689/6146/6129/3265/6203/130617/6223/64689/6138/5533/6124/51201/10133/6175/25873/11031/6130/6141/6727/9341/22883/6227/5621/51079/6164/6125/81693/51763/23513/84885/6616/5366/6449/6158/6235/6133/79720/84243/6128/6168/10952/6181/56993/1445…
GO_FIBRONECTIN_BINDING	GO_FIBRONECTIN_BINDING	26	0.6328	1.85178	0.0017639	0.0242545	0.0202305	2267	tags=42%, list=12%, signal=37%	3489/1513/3675/131578/6385/6423/3486/10272/284297/151887/7422
GO_RENAL_ABSORPTION	GO_RENAL_ABSORPTION	16	0.727981	1.88322	0.00180518	0.0247715	0.0206617	577	tags=25%, list=3%, signal=24%	360/2621/3043/2934
GO_EXTRACELLULAR_MATRIX_STRUCTURAL_CONSTITUENT_CONFERRING_COMPRESSION_RESISTANCE	GO_EXTRACELLULAR_MATRIX_STRUCTURAL_CONSTITUENT_CONFERRING_COMPRESSION_RESISTANCE	22	0.652477	1.83773	0.00181471	0.0248515	0.0207284	1254	tags=41%, list=7%, signal=38%	5549/633/1634/176/4060/127435/4969/150356/54829
GO_REGULATION_OF_MYELOID_LEUKOCYTE_DIFFERENTIATION	GO_REGULATION_OF_MYELOID_LEUKOCYTE_DIFFERENTIATION	115	0.386843	1.50791	0.00187319	0.0256003	0.021353	3045	tags=37%, list=17%, signal=31%	2353/7040/7071/6348/146433/7305/54209/2101/2242/3725/714/4609/8111/3204/6988/1435/284266/3624/972/81501/10234/9935/5925/3059/133308/10272/5457/4920/3635/861/7124/8451/9607/677/56998/3665/920/8600/2200/4067/54997/11006/169200
GO_SARCOLEMMA	GO_SARCOLEMMA	132	0.382609	1.51756	0.00189242	0.0257662	0.0214913	2854	tags=28%, list=16%, signal=24%	113146/1292/1291/302/6253/857/633/1674/3880/5339/858/10519/6769/358/79026/3856/64091/1293/7043/23336/682/301/6324/5348/6548/80024/27092/3916/6518/2318/3760/3745/3752/246329/476/493/775
GO_GLYCOSAMINOGLYCAN_BINDING	GO_GLYCOSAMINOGLYCAN_BINDING	218	0.327819	1.39588	0.00189299	0.0257662	0.0214913	2908	tags=28%, list=16%, signal=24%	59271/375790/5549/6288/8828/1307/633/348/4316/50509/1634/5118/176/8425/9982/54209/64094/5228/6649/5967/6159/7123/10631/1289/7423/1839/1056/6146/143903/2246/170689/283/7130/23166/8829/3075/284654/4053/3918/5621/151887/1311/6586/307/2022/7049/1404/56925/7422/5322/10457/339366/1511/5270/89797/6368/2200/566/1301/652/2252/308
GO_MHC_CLASS_II_PROTEIN_COMPLEX	GO_MHC_CLASS_II_PROTEIN_COMPLEX	14	0.76329	1.91124	0.00190907	0.0258218	0.0215377	3500	tags=93%, list=19%, signal=75%	3115/3123/3119/972/3117/3108/3109/3122/3113/3127/3118/3111/3120
GO_REGULATION_OF_ACTIN_CYTOSKELETON_REORGANIZATION	GO_REGULATION_OF_ACTIN_CYTOSKELETON_REORGANIZATION	37	0.555131	1.77049	0.00191245	0.0258218	0.0215377	1512	tags=38%, list=8%, signal=35%	80115/29984/90952/3055/29085/2242/1613/9535/1436/7226/10458/3265/8829/3059
GO_POSITIVE_REGULATION_OF_CALCIUM_ION_TRANSPORT	GO_POSITIVE_REGULATION_OF_CALCIUM_ION_TRANSPORT	119	0.384797	1.51245	0.00194057	0.0260968	0.0217671	4230	tags=38%, list=23%, signal=29%	3958/706/302/5155/57158/857/5159/6348/7070/10268/6387/4638/6769/6786/187/51393/6271/5031/6548/9001/6351/2149/117/10008/3306/246329/920/7225/1020/5027/353514/409/2946/6373/801/11027/825/57165/6375/5025/5026/7349/9002/9446/3627
GO_REGULATION_OF_LEUKOCYTE_DIFFERENTIATION	GO_REGULATION_OF_LEUKOCYTE_DIFFERENTIATION	267	0.311343	1.35422	0.00197849	0.0263956	0.0220163	3555	tags=34%, list=19%, signal=28%	441478/2621/2353/7040/7071/4092/6348/146433/7305/54209/8784/2101/2242/28959/3142/3725/714/4609/572/8111/3204/864/6988/604/8744/1435/301/4323/55365/284266/3135/3624/80149/972/56603/81501/3659/10234/9935/5925/3059/133308/55795/10272/5457/4920/3635/56833/861/7124/558/8451/3594/695/9607/942/677/27166/56998/3606/51043/3665/639/920/8600/2200/84807/652/8456/1960/10875/10288/4067/8808/54997/11006/169200/…
GO_RESPONSE_TO_COPPER_ION	GO_RESPONSE_TO_COPPER_ION	38	0.551387	1.77087	0.00202349	0.0266783	0.0222521	1714	tags=32%, list=9%, signal=29%	4493/4502/6284/4501/6649/358/6652/3297/11315/3383/5066/5621
GO_PLATELET_DERIVED_GROWTH_FACTOR_BINDING	GO_PLATELET_DERIVED_GROWTH_FACTOR_BINDING	11	0.802522	1.90722	0.00204673	0.0268903	0.0224289	2038	tags=73%, list=11%, signal=65%	1291/5155/5159/5154/1289/1281/1277/1278
GO_CYTOKINE_METABOLIC_PROCESS	GO_CYTOKINE_METABOLIC_PROCESS	114	0.386147	1.50564	0.00208356	0.0271651	0.0226581	4022	tags=37%, list=22%, signal=29%	7538/9314/3315/7305/3553/4050/602/2069/3625/3624/1958/8915/972/3659/51738/3569/5724/3635/7124/59307/148022/942/3606/3665/920/566/10148/51665/5970/5074/3552/10859/3902/2625/7474/1536/10642/4790/5607/1524/7057/1051
GO_PLATELET_ACTIVATION	GO_PLATELET_ACTIVATION	153	0.356043	1.44288	0.00208465	0.0271651	0.0226581	3375	tags=31%, list=18%, signal=26%	10398/2621/5155/6288/7056/348/3043/3315/2769/83706/2151/10630/5154/4846/2767/2207/1281/5580/7409/1277/4627/2316/6722/5592/1311/3569/7450/2149/8323/150/1278/558/1465/160851/928/5341/1606/7225/5270/4067/375033/9158/3611/409/10627/954/1192/958
GO_REGULATION_OF_SYSTEMIC_ARTERIAL_BLOOD_PRESSURE_BY_RENIN_ANGIOTENSIN	GO_REGULATION_OF_SYSTEMIC_ARTERIAL_BLOOD_PRESSURE_BY_RENIN_ANGIOTENSIN	25	0.631427	1.83821	0.00213107	0.0277162	0.0231178	2640	tags=40%, list=14%, signal=34%	183/4311/1535/1066/1359/2149/56670/185/2702/1511
GO_FICOLIN_1_RICH_GRANULE_MEMBRANE	GO_FICOLIN_1_RICH_GRANULE_MEMBRANE	57	0.485753	1.70108	0.00220566	0.0284662	0.0237434	3081	tags=37%, list=17%, signal=31%	5317/3958/10312/5799/2207/7226/3689/6515/374395/83858/965/3916/55004/22918/527/8655/1604/10288/3687/79930/11314
GO_REGULATION_OF_CHOLESTEROL_ESTERIFICATION	GO_REGULATION_OF_CHOLESTEROL_ESTERIFICATION	12	0.773064	1.87108	0.00223095	0.0286277	0.023878	2952	tags=58%, list=16%, signal=49%	183/348/341/55004/185/20/9619
GO_RESPONSE_TO_FLUID_SHEAR_STRESS	GO_RESPONSE_TO_FLUID_SHEAR_STRESS	33	0.563644	1.72926	0.00226863	0.0290076	0.024195	3896	tags=61%, list=21%, signal=48%	445/9314/5159/4092/5310/10365/7043/4846/2113/2697/4091/1437/3037/6721/5027/7980/2185/8754/5025/5607
GO_POSITIVE_REGULATION_OF_PHAGOCYTOSIS	GO_POSITIVE_REGULATION_OF_PHAGOCYTOSIS	66	0.460743	1.64952	0.00226919	0.0290076	0.024195	2925	tags=30%, list=16%, signal=26%	2621/54209/718/4240/1535/717/3553/721/3601/2207/5873/11031/4035/146722/7124/720/566/3673/10960/948
GO_NEGATIVE_REGULATION_OF_PEPTIDE_SECRETION	GO_NEGATIVE_REGULATION_OF_PEPTIDE_SECRETION	130	0.369558	1.4619	0.00233499	0.0296235	0.0247087	3706	tags=36%, list=20%, signal=29%	2621/7293/80772/348/415116/2633/2615/3553/90865/26056/301/7850/3625/80149/23005/972/5371/5734/284/5715/51738/947/284297/28984/2149/150/307/4345/7124/5211/3745/9607/285381/6720/308/8609/23208/353514/10859/114548/1992/84522/91942/353500/2335/3667/114769
GO_POSITIVE_REGULATION_OF_GUANYLATE_CYCLASE_ACTIVITY	GO_POSITIVE_REGULATION_OF_GUANYLATE_CYCLASE_ACTIVITY	10	0.810401	1.86722	0.00241654	0.0304384	0.0253883	869	tags=20%, list=5%, signal=19%	136/4846
GO_CYTOCHROME_COMPLEX	GO_CYTOCHROME_COMPLEX	28	0.632472	1.87921	0.00242419	0.0304678	0.0254129	1983	tags=50%, list=11%, signal=45%	84419/1537/84701/56901/1351/790955/1327/7384/170712/7381/1349/1340/29796/1337
GO_SYNCYTIUM_FORMATION	GO_SYNCYTIUM_FORMATION	53	0.485813	1.67773	0.00243973	0.0305578	0.0254879	3756	tags=43%, list=21%, signal=35%	26509/7305/54209/30846/135228/8038/6988/9518/92304/81501/10938/4627/2067/928/975/2323/10411/5738/128506/963/22904/8912/8754
GO_CHEMOKINE_RECEPTOR_BINDING	GO_CHEMOKINE_RECEPTOR_BINDING	61	0.469336	1.63867	0.00244079	0.0305578	0.0254879	2736	tags=28%, list=15%, signal=24%	57402/9547/414062/6348/6361/6366/6387/5473/387695/56477/1673/6367/6351/9034/58191/6370/6368
GO_ACUTE_INFLAMMATORY_RESPONSE	GO_ACUTE_INFLAMMATORY_RESPONSE	106	0.396868	1.52122	0.00244498	0.0305578	0.0254879	3649	tags=39%, list=20%, signal=31%	2161/445/6288/6289/26471/718/3553/5008/3133/2207/23780/2950/11315/5265/388125/7036/3383/57817/3569/2056/2867/7124/5733/59307/695/56998/2152/8600/1776/923/25807/3570/3552/114548/54210/3250/2625/53833/101/9536/2335
GO_NEGATIVE_REGULATION_OF_CYTOKINE_SECRETION	GO_NEGATIVE_REGULATION_OF_CYTOKINE_SECRETION	65	0.461092	1.64869	0.00247355	0.0308002	0.0256902	2174	tags=29%, list=12%, signal=26%	2621/7293/80772/2633/2615/301/7850/80149/23005/5371/5734/284/51738/947/284297/28984/307/4345/7124
GO_REGULATION_OF_ION_TRANSMEMBRANE_TRANSPORT	GO_REGULATION_OF_ION_TRANSMEMBRANE_TRANSPORT	462	0.276512	1.28304	0.00248123	0.0308388	0.0257224	4741	tags=36%, list=26%, signal=28%	9022/5349/53827/3755/4318/400916/183/57158/857/10312/8660/7070/54209/10268/3779/1535/130497/11261/6330/6769/6786/2040/23542/79026/60598/823/187/3757/9424/53373/126306/5728/6236/6271/5999/3772/6324/5031/3741/11315/3764/65018/5348/57817/6548/2316/9001/10089/5621/5350/729993/5724/8514/2056/2149/150/8398/27092/23479/154/10681/9948/610/388591/255738/3751/3760/3745/4644/1193/10008/3306/3792/2745/2702/3…
GO_MATURE_B_CELL_DIFFERENTIATION	GO_MATURE_B_CELL_DIFFERENTIATION	25	0.62353	1.81522	0.00252986	0.0313038	0.0261102	4916	tags=60%, list=27%, signal=44%	3956/3955/4242/602/56833/28514/100/5452/9452/2185/112616/1880/2213/5336/55619
GO_NEGATIVE_REGULATION_OF_IMMUNE_SYSTEM_PROCESS	GO_NEGATIVE_REGULATION_OF_IMMUNE_SYSTEM_PROCESS	430	0.283762	1.30491	0.00253261	0.0313038	0.0261102	3152	tags=27%, list=17%, signal=23%	441478/3958/4681/4282/11117/7538/7040/79148/5654/1843/4321/3134/4092/8764/6348/7070/10519/6318/7305/2633/6366/23643/6387/2876/2615/29085/28959/710/3142/714/4609/1652/3133/8111/7043/7940/3204/90865/864/6988/604/2207/6385/301/1281/55365/79626/929/3135/79594/10039/3624/80149/123169/8915/972/3659/6223/11326/10234/3620/9935/5734/56477/84166/284/3202/10272/5621/9684/4212/9404/23513/3635/2/56833/388585/…
GO_ENDODERM_FORMATION	GO_ENDODERM_FORMATION	50	0.490551	1.6922	0.00255802	0.0315599	0.0263238	1909	tags=32%, list=10%, signal=29%	4318/3914/1291/1294/4313/1289/3678/4323/3689/3624/123169/64321/9241/3909/3693/83595
GO_REGULATION_OF_GUANYLATE_CYCLASE_ACTIVITY	GO_REGULATION_OF_GUANYLATE_CYCLASE_ACTIVITY	13	0.748023	1.82107	0.00256274	0.0315601	0.026324	869	tags=15%, list=5%, signal=15%	136/4846
GO_REGULATION_OF_PHAGOCYTOSIS	GO_REGULATION_OF_PHAGOCYTOSIS	89	0.410689	1.53548	0.00259015	0.0317814	0.0265085	3223	tags=30%, list=18%, signal=25%	2621/54209/718/4240/1535/717/3055/3553/721/3601/5728/2207/5873/11031/4035/146722/7124/720/1445/2268/566/3673/10960/948/11314/23208/2889
GO_NEGATIVE_REGULATION_OF_BLOOD_VESSEL_ENDOTHELIAL_CELL_MIGRATION	GO_NEGATIVE_REGULATION_OF_BLOOD_VESSEL_ENDOTHELIAL_CELL_MIGRATION	32	0.585761	1.7848	0.00262236	0.0320595	0.0267405	4118	tags=47%, list=23%, signal=36%	7040/9314/348/29775/54567/6915/94/28984/79812/161742/4851/5607/387/7057/90627
GO_NEGATIVE_REGULATION_OF_CELL_ACTIVATION	GO_NEGATIVE_REGULATION_OF_CELL_ACTIVATION	192	0.334404	1.39861	0.00263626	0.032171	0.0268335	3152	tags=30%, list=17%, signal=25%	441478/3958/11117/5155/3134/7056/4092/348/8764/114757/7305/2615/3142/5154/4846/7940/864/604/6385/301/79626/3135/10039/3624/80149/972/3659/5580/11326/3620/5621/5592/3635/861/4345/146722/29126/558/2796/10457/695/928/942/2268/84868/51043/5270/84807/652/10875/10288/4067/11314/23208/25807/9572/5074/10464
GO_TUMOR_NECROSIS_FACTOR_SUPERFAMILY_CYTOKINE_PRODUCTION	GO_TUMOR_NECROSIS_FACTOR_SUPERFAMILY_CYTOKINE_PRODUCTION	150	0.345655	1.39632	0.00265765	0.0323147	0.0269534	3713	tags=34%, list=20%, signal=27%	2621/706/4282/54/7538/6348/10417/3315/7305/54209/23643/1535/1652/50856/3133/2207/114900/929/3297/602/4776/2950/80149/8915/83786/284/51738/947/5724/29126/558/10457/148022/942/84868/566/945/948/23208/353514/409/10859/58509/7291/101/4317/11027/7474/1536/5196/961
GO_POSITIVE_REGULATION_OF_LEUKOCYTE_CHEMOTAXIS	GO_POSITIVE_REGULATION_OF_LEUKOCYTE_CHEMOTAXIS	84	0.43609	1.61211	0.00271614	0.0328006	0.0273586	2423	tags=32%, list=13%, signal=28%	57402/2621/9547/5919/6348/5054/5880/7424/6366/199/6387/5228/1906/59341/7423/1435/6278/972/1240/3569/2155/6351/284114/63940/719/7422/10488
GO_POSITIVE_REGULATION_OF_ENDOTHELIAL_CELL_MIGRATION	GO_POSITIVE_REGULATION_OF_ENDOTHELIAL_CELL_MIGRATION	92	0.40851	1.53491	0.0027294	0.0328898	0.027433	1579	tags=26%, list=9%, signal=24%	183/7040/5155/8828/9982/10519/3315/7424/2303/64094/1906/9564/4846/27286/2113/301/306/2246/80149/10000/8829/284/57381/7476
GO_LYSOSOMAL_LUMEN	GO_LYSOSOMAL_LUMEN	92	0.408246	1.53392	0.00276508	0.0331415	0.027643	2791	tags=36%, list=15%, signal=31%	2817/375790/5549/6382/3373/1513/633/5159/1634/176/4060/410/10577/4969/427/6385/1508/3425/1509/972/2760/6383/10082/5476/8722/1464/8635/5275/3988/3073/2517/10437/3423
GO_NEGATIVE_REGULATION_OF_INTERLEUKIN_1_PRODUCTION	GO_NEGATIVE_REGULATION_OF_INTERLEUKIN_1_PRODUCTION	31	0.584917	1.77549	0.00277814	0.0332388	0.0277241	3915	tags=48%, list=21%, signal=38%	2621/54/80772/54209/7850/2950/80149/5371/51738/945/409/114548/1992/114769/1524
GO_RESPONSE_TO_AMYLOID_BETA	GO_RESPONSE_TO_AMYLOID_BETA	47	0.484931	1.64914	0.00282714	0.033586	0.0280137	3098	tags=40%, list=17%, signal=34%	4318/4322/4321/54209/10268/4313/3480/478/2697/1759/3383/5621/4035/154/4314/1020/599/948/5641
GO_ENDOTHELIAL_CELL_PROLIFERATION	GO_ENDOTHELIAL_CELL_PROLIFERATION	135	0.365162	1.45048	0.00287563	0.0339224	0.0282943	2869	tags=33%, list=16%, signal=28%	441478/51162/5155/8828/857/348/3164/858/9982/1893/7424/1535/6387/5228/5797/3725/54567/187/94/7423/4323/283/2697/8742/10000/8829/1969/51738/947/51548/2324/28984/2321/650/7124/56005/7422/3791/654/185/2152/4017/652/1960/8854
GO_AMINOGLYCAN_BIOSYNTHETIC_PROCESS	GO_AMINOGLYCAN_BIOSYNTHETIC_PROCESS	113	0.383432	1.49826	0.00294347	0.0346013	0.0288606	2367	tags=32%, list=13%, signal=28%	2817/7040/375790/5549/5155/6382/3373/633/5159/1634/176/4060/3553/79586/4969/8534/11285/126792/6385/6482/6383/92126/9955/64711/284/9435/26229/51363/64131/10082/56548/1464/50515/374907/9469/6484
GO_BIOMINERALIZATION	GO_BIOMINERALIZATION	154	0.349555	1.42016	0.00301593	0.0352131	0.0293709	2794	tags=30%, list=15%, signal=26%	2621/4322/7475/4488/249/7040/7071/302/116039/10312/79176/6348/1893/56975/130497/6786/7123/51119/7043/4846/4054/338773/4921/9636/54829/1277/468/286077/5744/4920/1311/1594/3381/1278/650/154/6696/10457/54361/654/2268/23462/5745/1901/9622/652
GO_MACROPHAGE_MIGRATION	GO_MACROPHAGE_MIGRATION	48	0.500392	1.69581	0.00302936	0.0352902	0.0294352	2744	tags=42%, list=15%, signal=36%	3958/4282/11117/79148/6288/5919/6348/54209/1652/59341/1435/4323/1240/4920/56833/4345/719/928/975/566
GO_LIPASE_INHIBITOR_ACTIVITY	GO_LIPASE_INHIBITOR_ACTIVITY	17	0.681622	1.79973	0.00303584	0.0352902	0.0294352	3370	tags=41%, list=18%, signal=34%	302/301/306/341/307/308/390940
GO_POSITIVE_REGULATION_OF_REACTIVE_OXYGEN_SPECIES_BIOSYNTHETIC_PROCESS	GO_POSITIVE_REGULATION_OF_REACTIVE_OXYGEN_SPECIES_BIOSYNTHETIC_PROCESS	48	0.499122	1.6915	0.00308934	0.035692	0.0297703	1524	tags=29%, list=8%, signal=27%	445/183/9314/3043/199/1535/3553/10365/1906/90527/3689/5873/11315/3383
GO_SECRETORY_GRANULE_MEMBRANE	GO_SECRETORY_GRANULE_MEMBRANE	289	0.304212	1.33353	0.00310097	0.0357649	0.0298311	3868	tags=34%, list=21%, signal=27%	5317/3958/10555/64114/857/10312/5799/5328/858/7305/4311/290/1535/5329/2040/8694/221/135228/10043/9145/51365/2207/7226/682/929/3689/391/5873/6515/11010/79895/374395/11031/5175/64386/5066/83858/3903/965/160364/5724/4973/8514/8372/6616/6836/53831/3916/51706/6518/55004/25798/719/22918/6813/527/148229/51382/928/57153/8673/6861/8655/53916/566/6793/945/948/1604/10288/102/3687/53917/79930/10184/50624/762…
GO_INTERLEUKIN_8_PRODUCTION	GO_INTERLEUKIN_8_PRODUCTION	77	0.425626	1.54929	0.00314195	0.0361755	0.0301736	2174	tags=23%, list=12%, signal=21%	9314/5054/3553/301/929/602/3303/11315/1116/23005/8915/972/284297/965/2149/307/2867/7124
GO_NADH_DEHYDROGENASE_COMPLEX_ASSEMBLY	GO_NADH_DEHYDROGENASE_COMPLEX_ASSEMBLY	55	0.479951	1.6695	0.00318779	0.0364603	0.0304112	4839	tags=53%, list=26%, signal=39%	374291/4715/4713/51103/25915/4723/4700/51079/4712/51295/4728/4716/126328/4724/28976/4702/4729/4726/91942/4708/4706/4695/4707/55863/4709/4731/4717/4710/4718
GO_MYELOID_DENDRITIC_CELL_DIFFERENTIATION	GO_MYELOID_DENDRITIC_CELL_DIFFERENTIATION	18	0.672292	1.79877	0.00323311	0.0367841	0.0306813	2263	tags=50%, list=12%, signal=44%	6688/10202/116071/55509/81501/10538/10537/1437/4055
GO_CHEMOKINE_BIOSYNTHETIC_PROCESS	GO_CHEMOKINE_BIOSYNTHETIC_PROCESS	16	0.707743	1.83086	0.00328265	0.037121	0.0309623	2744	tags=56%, list=15%, signal=48%	3553/1958/972/3569/7124/59307/148022/3606/566
GO_ENDOCRINE_PROCESS	GO_ENDOCRINE_PROCESS	81	0.430471	1.57864	0.0032848	0.037121	0.0309623	2640	tags=30%, list=14%, signal=25%	183/4311/1535/3553/6926/1906/4846/1066/26056/1889/3625/3624/338442/2697/2297/1359/51738/2149/654/56670/185/2702/1394/1511
GO_NEGATIVE_REGULATION_OF_INTERFERON_GAMMA_PRODUCTION	GO_NEGATIVE_REGULATION_OF_INTERFERON_GAMMA_PRODUCTION	33	0.550203	1.68802	0.00330903	0.0372696	0.0310862	3808	tags=36%, list=21%, signal=29%	2621/90865/3624/80149/5621/29126/558/84868/10859/2625/53833/6375
GO_NADH_DEHYDROGENASE_COMPLEX	GO_NADH_DEHYDROGENASE_COMPLEX	42	0.516335	1.67299	0.0034128	0.0382461	0.0319007	4839	tags=57%, list=26%, signal=42%	374291/4715/4713/51103/4723/4700/51079/4712/4728/4716/126328/4724/4702/4729/4726/4708/4706/4695/4707/4709/4731/4717/4710/4718
GO_SPECIFIC_GRANULE	GO_SPECIFIC_GRANULE	158	0.340612	1.39264	0.003437	0.0382718	0.0319222	2406	tags=27%, list=13%, signal=24%	3934/10555/6590/567/64114/1265/8566/5328/126014/1535/5329/30/10321/2040/8694/221/10043/7226/3689/5873/6515/306/1116/1509/79895/64386/54472/3903/160364/4973/8514/6616/1774/53831/6518/55004/79792/719/22918/6813/51382/311/57153
GO_REGULATION_OF_LEUKOCYTE_APOPTOTIC_PROCESS	GO_REGULATION_OF_LEUKOCYTE_APOPTOTIC_PROCESS	83	0.420634	1.54691	0.00344356	0.0382718	0.0319222	3623	tags=41%, list=20%, signal=33%	3958/2621/4282/5304/8660/6366/5293/6387/5728/604/2207/301/338442/8915/972/3620/11035/3059/26155/29126/558/695/27166/3665/84807/652/4067/5027/100/10859/101/155038/8013/7474
GO_GONADOTROPIN_SECRETION	GO_GONADOTROPIN_SECRETION	14	0.744806	1.86496	0.00345089	0.0382901	0.0319373	1379	tags=36%, list=8%, signal=33%	6926/3625/3624/2697/2297
GO_REGULATION_OF_APOPTOTIC_SIGNALING_PATHWAY	GO_REGULATION_OF_APOPTOTIC_SIGNALING_PATHWAY	386	0.282595	1.27675	0.0035843	0.0393805	0.0328469	2346	tags=24%, list=13%, signal=22%	3958/2810/4582/4318/4282/6591/50486/400916/183/64114/857/1512/57007/5054/26471/3315/467/6387/2876/79156/1613/5329/3553/2934/85450/51330/4487/219699/572/25946/23542/51024/56917/4846/4000/5728/638/6615/6135/79594/4102/4776/3303/2950/754/11315/3625/3624/8996/8915/8717/972/2730/5371/5580/80237/26355/9241/2023/5533/8742/6423/65018/8829/11035/5925/138151/3383/8738/26155/90993/7178/51079/2017/26287/8406…
GO_CADHERIN_BINDING	GO_CADHERIN_BINDING	306	0.296544	1.29906	0.00365939	0.0400745	0.0334257	2757	tags=27%, list=15%, signal=24%	5317/6286/53827/23650/11135/2810/9351/10397/55357/302/10848/1265/7408/5339/79180/85377/832/5214/5797/9045/6159/11187/10755/1936/79026/6624/29766/6282/6520/9973/682/301/6455/3303/10458/11315/83874/6138/2023/10938/56904/6130/23348/3646/8407/55898/22827/4627/1969/2316/831/822/6164/30844/1009/2017/6811/23513/51510/9124/1002/5331/6128/8428/11344/11313/226/6187/3791/57410/2125/3337/1010/85456/3875/2364…
GO_PEPTIDE_HORMONE_PROCESSING	GO_PEPTIDE_HORMONE_PROCESSING	30	0.588134	1.7892	0.00372545	0.0406315	0.0338903	2640	tags=30%, list=14%, signal=26%	5045/4311/1066/1889/1359/4803/25825/27344/1511
GO_NEGATIVE_REGULATION_OF_LEUKOCYTE_CELL_CELL_ADHESION	GO_NEGATIVE_REGULATION_OF_LEUKOCYTE_CELL_CELL_ADHESION	118	0.372426	1.45322	0.00372976	0.0406315	0.0338903	3476	tags=35%, list=19%, signal=28%	441478/3958/445/9314/4092/8764/6366/6387/2615/3142/864/604/6385/301/79626/3135/80149/972/3659/11326/3620/56477/5621/861/29126/2796/10457/942/84868/51043/6370/84807/652/10875/10288/11314/5074/10859/3902/5320/53833
GO_OXYGEN_CARRIER_ACTIVITY	GO_OXYGEN_CARRIER_ACTIVITY	14	0.742302	1.85868	0.00374047	0.0406315	0.0338903	468	tags=21%, list=3%, signal=21%	3043/114757/3040
GO_REGULATION_OF_OXIDOREDUCTASE_ACTIVITY	GO_REGULATION_OF_OXIDOREDUCTASE_ACTIVITY	96	0.396868	1.49004	0.00375076	0.0406776	0.0339288	2174	tags=25%, list=12%, signal=22%	400916/183/857/348/4883/114757/6697/1535/3553/1906/4846/8639/9973/132160/6271/11315/333926/11035/1594/54704/56833/2771/51295/7124
GO_RESPIRATORY_CHAIN_COMPLEX_IV	GO_RESPIRATORY_CHAIN_COMPLEX_IV	16	0.699692	1.81003	0.00377628	0.0408884	0.0341046	1983	tags=56%, list=11%, signal=50%	84419/84701/56901/1351/1327/170712/1349/1340/1337
GO_HIGH_DENSITY_LIPOPROTEIN_PARTICLE	GO_HIGH_DENSITY_LIPOPROTEIN_PARTICLE	26	0.599322	1.75382	0.00386997	0.0416347	0.0347271	4220	tags=50%, list=23%, signal=39%	6288/348/6289/341/79135/8542/5360/55937/5444/1071/3250/319/6291
GO_REGULATION_OF_CALCIUM_ION_TRANSPORT	GO_REGULATION_OF_CALCIUM_ION_TRANSPORT	245	0.313409	1.35471	0.00387979	0.0416737	0.0347596	3325	tags=27%, list=18%, signal=22%	3958/706/183/302/5155/8614/57158/857/5159/6348/7070/10268/1535/6387/4638/6769/6786/79026/187/4846/126306/51393/6236/6271/5999/5031/2697/5371/3383/6548/9001/5621/5350/51763/80024/6351/29763/2056/2149/150/8398/10681/117/2771/4644/1193/10008/3306/1394/246329/920/7225/1020/775/4985/945/10288/4067/5027/353514/2669/11151/409/10859/2946/6373
GO_FAT_SOLUBLE_VITAMIN_BIOSYNTHETIC_PROCESS	GO_FAT_SOLUBLE_VITAMIN_BIOSYNTHETIC_PROCESS	15	0.704979	1.78105	0.00390367	0.0417966	0.0348621	2628	tags=47%, list=14%, signal=40%	6591/3553/6615/5360/1594/7124/1593
GO_HEPARIN_BINDING	GO_HEPARIN_BINDING	161	0.335493	1.36321	0.0039359	0.042008	0.0350384	2908	tags=31%, list=16%, signal=26%	59271/5549/6288/8828/1307/348/4316/50509/5118/9982/64094/5228/6649/6159/7123/10631/1289/7423/1839/1056/6146/2246/170689/283/8829/3075/284654/4053/3918/5621/151887/1311/6586/307/7049/56925/7422/5322/10457/339366/1511/5270/89797/6368/2200/566/1301/652/2252/308
GO_REGULATION_OF_CYTOKINE_PRODUCTION_INVOLVED_IN_IMMUNE_RESPONSE	GO_REGULATION_OF_CYTOKINE_PRODUCTION_INVOLVED_IN_IMMUNE_RESPONSE	85	0.404312	1.5064	0.00414144	0.0437379	0.0364814	3881	tags=42%, list=21%, signal=34%	4282/7040/567/3134/4092/8764/10417/3553/3133/7043/604/2207/3135/8915/8482/972/284/3569/2867/7124/353091/148022/695/3606/975/948/10859/114548/2625/8013/7186/7474/684/6375/7133/388325
GO_TISSUE_REMODELING	GO_TISSUE_REMODELING	165	0.331899	1.35531	0.00421358	0.044285	0.0369377	2766	tags=29%, list=15%, signal=25%	54/183/7040/1471/64114/1513/857/10312/633/1999/182/5880/2303/4313/7076/54567/823/7043/1436/4846/94/301/4323/4054/284266/338773/4921/81501/2697/1969/3569/2324/2149/3635/1464/154/6696/558/1445/10457/9607/23154/3988/2702/3606/8600/5745/1901
GO_LUMENAL_SIDE_OF_MEMBRANE	GO_LUMENAL_SIDE_OF_MEMBRANE	28	0.612587	1.82012	0.00429912	0.0450735	0.0375954	3644	tags=68%, list=20%, signal=54%	3134/3115/3123/3133/3119/3135/972/3117/3122/121665/5476/84888/3113/56928/3127/3118/4924/3120/6892
GO_RESPONSE_TO_LAMINAR_FLUID_SHEAR_STRESS	GO_RESPONSE_TO_LAMINAR_FLUID_SHEAR_STRESS	13	0.732345	1.7829	0.00432	0.0451051	0.0376217	1365	tags=54%, list=7%, signal=50%	445/9314/4092/10365/7043/2113/4091
GO_ANTIGEN_PROCESSING_AND_PRESENTATION_OF_ENDOGENOUS_PEPTIDE_ANTIGEN	GO_ANTIGEN_PROCESSING_AND_PRESENTATION_OF_ENDOGENOUS_PEPTIDE_ANTIGEN	15	0.700744	1.77035	0.00433474	0.0451888	0.0376916	1320	tags=47%, list=7%, signal=43%	567/3134/6891/2217/3133/3135/6890
GO_ENDOPEPTIDASE_ACTIVITY	GO_ENDOPEPTIDASE_ACTIVITY	410	0.2766	1.26104	0.00444791	0.0460828	0.0384372	2768	tags=20%, list=15%, signal=17%	5655/2161/4318/4322/43847/11012/5304/11202/79148/5654/64699/4321/1513/5653/1512/4316/5328/5045/4311/1675/94031/4313/717/23581/4320/388743/5696/5698/64063/823/4319/5699/170690/8038/8751/4323/1508/9507/1889/9509/2159/4326/170689/4327/1509/5646/2191/64386/3004/440854/140766/715/2155/826/7177/10942/2923/121665/8722/84888/4314/649/25825/3082/80332/255738/113791/5695/388630/3792/11132/56675/56928/5327/…
GO_NEUTROPHIL_MIGRATION	GO_NEUTROPHIL_MIGRATION	114	0.370447	1.44443	0.00449504	0.0464995	0.0387847	3957	tags=37%, list=22%, signal=29%	3958/414062/6288/7499/6348/5880/6361/6366/5293/3553/1906/4267/2207/83700/3689/391/5473/972/7409/5175/3672/6367/6351/56833/9948/719/6370/57580/6368/3557/3552/6373/84522/6369/101/23396/5196/728/6375/6374/10344/3071
GO_COMPLEMENT_ACTIVATION	GO_COMPLEMENT_ACTIVATION	69	0.449803	1.61685	0.00455438	0.0468968	0.0391162	2599	tags=30%, list=14%, signal=26%	712/718/1675/5627/713/717/710/3553/714/721/3848/11326/3075/715/28984/2/719/720/8547/3543/975
GO_POSITIVE_REGULATION_OF_SUPRAMOLECULAR_FIBER_ORGANIZATION	GO_POSITIVE_REGULATION_OF_SUPRAMOLECULAR_FIBER_ORGANIZATION	188	0.32805	1.36403	0.00457606	0.0469762	0.0391824	2005	tags=22%, list=11%, signal=20%	11135/80115/6281/10095/148170/348/7408/389/6366/2876/3055/2242/643338/9535/2934/1906/10174/59341/7043/9647/10093/6385/55845/3303/55160/10458/3397/7168/402/8829/5925/3383/123720/7454/2316/7016/2017/81873/11034/85477/28984/22899
GO_REGENERATION	GO_REGENERATION	182	0.328621	1.35813	0.00463694	0.0475286	0.0396431	2638	tags=27%, list=14%, signal=23%	10076/6665/2621/706/11202/9076/4837/9314/5653/595/10404/349667/7070/6387/2876/5228/2934/5967/3725/5396/10631/6156/8751/5728/301/5605/83700/8578/2950/306/133/688/3913/57817/7476/4035/2356/2155/7049/6696/3082/8428/558/83481/928/2596/23162/975/5315
GO_POSITIVE_REGULATION_OF_FIBROBLAST_PROLIFERATION	GO_POSITIVE_REGULATION_OF_FIBROBLAST_PROLIFERATION	49	0.478238	1.63144	0.00466499	0.0476708	0.0397618	1484	tags=33%, list=8%, signal=30%	6277/2621/4282/183/302/5155/5159/358/3725/4609/5154/4921/2069/972/5371/2099
GO_RESPONSE_TO_PROTOZOAN	GO_RESPONSE_TO_PROTOZOAN	26	0.591958	1.73227	0.00473597	0.0482494	0.0402444	1567	tags=31%, list=9%, signal=28%	2634/116071/602/115361/3265/163351/10538/283234
GO_GATED_CHANNEL_ACTIVITY	GO_GATED_CHANNEL_ACTIVITY	338	0.282598	1.25311	0.00483404	0.0490201	0.0408872	4473	tags=30%, list=24%, signal=23%	9022/2621/3755/22821/302/57158/27112/3779/2563/6330/358/1259/59341/3757/9424/53373/7226/2901/3772/6324/3741/3764/6340/10089/8514/6616/27092/2562/610/3751/3760/3745/7417/2894/1193/1141/10008/30818/3752/9311/2905/93589/1020/775/9635/117144/2568/5027/9780/2556/2569/55879/3762/1183/25932/56659/3736/53405/1192/203859/3785/2185/1536/9312/89822/8912/23415/6263/5025/30820/5026/3782/23704/131096/147138/30…
GO_ZYMOGEN_ACTIVATION	GO_ZYMOGEN_ACTIVATION	51	0.482595	1.66019	0.0048619	0.04916	0.0410039	1411	tags=24%, list=8%, signal=22%	2161/302/1512/5054/5328/5045/572/7123/4323/83874/2023/5646
GO_LAMININ_BINDING	GO_LAMININ_BINDING	28	0.606469	1.80194	0.00487233	0.0491915	0.0410301	1116	tags=36%, list=6%, signal=34%	3958/27076/3956/2817/375790/3675/1893/131578/3921/64129
GO_REGULATION_OF_LYMPHOCYTE_ACTIVATION	GO_REGULATION_OF_LYMPHOCYTE_ACTIVATION	413	0.274169	1.24992	0.00489909	0.0492257	0.0410587	3511	tags=30%, list=19%, signal=25%	441478/3958/2621/4282/7293/3956/7040/3134/857/4092/8764/10673/8660/7070/7305/5880/6366/3115/199/8784/2615/3553/3142/2934/572/3133/1948/1326/7940/864/604/8744/6385/301/4323/79626/3135/10039/3624/80149/8915/972/56603/3659/11326/3620/7409/11035/283234/79155/55795/1947/3109/5621/3569/27240/2056/3635/56833/861/3280/3916/29126/558/2796/1445/10457/912/3113/3594/148022/695/1141/942/677/27166/4004/2268/35…
GO_ENTRY_INTO_HOST	GO_ENTRY_INTO_HOST	129	0.361926	1.4214	0.00495534	0.0495829	0.0413566	3036	tags=33%, list=17%, signal=27%	3853/2621/7293/9076/3956/3373/857/8764/858/6317/290/10410/2934/6510/3921/1948/57617/3678/1508/5817/79581/3303/972/10581/3383/1969/3693/6404/8372/3916/558/942/8547/9080/8673/8519/975/920/3673/10572/1604/30835

## Sheet: Low -risk group GO terms
ID	Description	setSize	enrichmentScore	NES	pvalue	p.adjust	qvalues	rank	leading_edge	core_enrichment
GO_ATPASE_ACTIVITY	GO_ATPASE_ACTIVITY	403	-0.54515	-2.10197	1e-10	1.46174e-08	1.21922e-08	4006	tags=46%, list=22%, signal=37%	1654/81570/27030/9416/10146/154664/55636/3834/79009/57697/4905/57062/375748/80119/6595/257218/2068/4174/8449/5704/23064/22985/9775/57634/55760/79659/1665/10111/11144/1108/5985/55137/127602/23046/91646/11104/29789/5983/5217/1662/55605/4683/91351/490/1107/57674/4439/5706/9585/55582/56897/347240/64848/23456/10057/79784/5892/9044/11127/9188/23405/10847/55193/1656/2968/3799/23/3329/11218/23499/22836/1…
GO_ATPASE_ACTIVITY_COUPLED	GO_ATPASE_ACTIVITY_COUPLED	278	-0.569241	-2.14057	1e-10	1.46174e-08	1.21922e-08	3930	tags=48%, list=21%, signal=38%	9416/10146/55636/3834/79009/57697/4905/57062/375748/80119/6595/257218/2068/4174/8449/5704/23064/9775/57634/55760/79659/1665/10111/11144/1108/5985/55137/127602/91646/11104/5983/1662/4683/91351/1107/4439/9585/64848/79784/5892/9044/11127/9188/23405/10847/55193/1656/2968/3799/11218/1974/10721/1105/3326/51182/79075/4343/9400/23095/11325/7520/91607/7155/55601/5928/8886/8701/9557/1655/8467/56916/10973/8…
GO_CATALYTIC_ACTIVITY_ACTING_ON_DNA	GO_CATALYTIC_ACTIVITY_ACTING_ON_DNA	198	-0.564666	-2.05017	1e-10	1.46174e-08	1.21922e-08	3578	tags=47%, list=20%, signal=38%	51567/2068/4174/23064/201973/3159/10111/11144/1108/5985/5983/5422/4683/27343/1107/112479/7014/10728/4830/8930/23405/55193/5429/51455/10721/1105/4595/11232/79075/64789/5423/9400/328/5810/7520/7155/64858/55247/5424/92667/9557/56916/10973/84181/641/5889/7374/6996/2072/54821/7150/348654/1736/3978/5427/5426/5982/4176/5965/57680/5980/254394/4173/10714/84296/146956/1663/546/1660/8438/8318/170506/2237/17…
GO_CELL_CYCLE_G2_M_PHASE_TRANSITION	GO_CELL_CYCLE_G2_M_PHASE_TRANSITION	259	-0.520064	-1.94474	1e-10	1.46174e-08	1.21922e-08	3199	tags=41%, list=17%, signal=34%	5347/80169/51400/891/1019/4683/1453/6873/55920/95681/5566/5706/4303/5713/9662/84446/7532/85417/9113/23476/79959/51512/6790/80174/7465/121441/5709/10197/84930/10142/7840/5708/11113/7846/2029/11064/5569/7531/5218/8493/22919/57504/23236/11200/115106/1069/641/54801/5889/23354/7283/22976/22994/7164/55031/8555/10763/29980/91603/9738/11073/23332/219736/993/5718/8883/10733/5500/11190/10806/672/1111/54820…
GO_CHROMATIN_ASSEMBLY_OR_DISASSEMBLY	GO_CHROMATIN_ASSEMBLY_OR_DISASSEMBLY	115	-0.631167	-2.16981	1e-10	1.46174e-08	1.21922e-08	3326	tags=51%, list=18%, signal=42%	3159/4778/1616/64105/1107/8520/64946/55839/55193/55320/8208/23522/55869/6602/10541/91687/29855/5928/8289/8467/6603/196528/6605/1029/55355/5931/51773/11198/10036/7994/10664/23347/25842/11240/55723/7259/6601/11011/79172/9874/6599/546/1058/2491/6597/79723/9031/6662/3070/6594/7175/4171/79682/387103/201161/3148/23270/4678/85453
GO_CHROMATIN_REMODELING	GO_CHROMATIN_REMODELING	151	-0.598266	-2.11568	1e-10	1.46174e-08	1.21922e-08	3364	tags=55%, list=18%, signal=45%	9219/54069/55011/11176/55636/55166/6595/57492/23135/27443/3159/10361/1616/1108/5058/64105/1107/64946/55839/6944/55929/3183/10847/55193/7403/22955/55320/1105/6602/8242/9025/5757/91687/5928/8289/9557/29994/8467/56916/6603/6605/6871/1029/22880/55355/5931/51773/7150/11335/57680/23347/9682/6830/6601/80336/79172/6599/546/1058/2491/5927/57459/6597/79723/9031/3169/6662/11177/86/10765/3070/6594/81611/4602…
GO_CHROMOSOMAL_REGION	GO_CHROMOSOMAL_REGION	306	-0.620358	-2.35771	1e-10	1.46174e-08	1.21922e-08	3717	tags=54%, list=20%, signal=44%	80119/675/9878/545/5514/10428/25942/4174/84516/23122/472/5000/6847/23064/1783/23137/54908/157570/3619/1616/10111/11144/5347/80169/4928/891/113130/64105/4683/23310/55920/8520/6741/64946/7014/10728/4999/5501/56897/55839/23028/80351/5892/10320/51164/55183/22955/6790/259282/324/7756/55320/701/5253/81929/221150/79577/10189/253635/10734/9770/79075/79003/9025/328/7520/57405/91687/64858/5424/23244/11200/…
GO_CHROMOSOME_CENTROMERIC_REGION	GO_CHROMOSOME_CENTROMERIC_REGION	179	-0.639563	-2.30414	1e-10	1.46174e-08	1.21922e-08	3483	tags=56%, list=19%, signal=46%	25942/84516/23122/6847/1783/54908/157570/3619/1616/5347/4928/891/113130/64105/23310/55920/64946/4999/5501/55839/10320/51164/6790/259282/324/7756/55320/701/5253/81929/221150/253635/10734/9770/79075/79003/57405/91687/23244/79902/284058/57122/7514/1062/348995/27127/55355/54821/11335/9126/10664/11130/4085/23332/2332/55143/79172/10735/546/1058/11004/348235/2491/25936/5525/54820/23219/147841/3192/23468…
GO_CHROMOSOME_SEGREGATION	GO_CHROMOSOME_SEGREGATION	293	-0.56904	-2.155	1e-10	1.46174e-08	1.21922e-08	4177	tags=50%, list=23%, signal=39%	9391/51203/54069/64793/1459/11243/1654/27030/10459/256126/284086/55166/3834/56984/10097/51451/57697/6421/2068/472/6847/9232/23137/54908/157570/9055/3619/11144/5347/7917/891/113130/64105/23310/55920/10460/2177/55154/55839/25836/898/80218/9113/324/7756/57820/114799/9493/701/81929/55869/221150/8239/10734/79075/292/79003/9400/9319/55706/57405/7155/64682/10592/996/56271/23244/79892/56916/23636/150465/…
GO_CHROMOSOME_TELOMERIC_REGION	GO_CHROMOSOME_TELOMERIC_REGION	131	-0.619664	-2.1526	1e-10	1.46174e-08	1.21922e-08	3799	tags=53%, list=21%, signal=42%	55135/80119/675/9878/545/5514/4174/472/5000/23064/23137/10111/11144/80169/4683/8520/6741/7014/10728/4999/5501/56897/23028/80351/5892/55183/79577/10189/9025/328/7520/64858/5424/11200/641/6117/3181/2072/11335/9984/25913/4176/4173/55226/5431/23347/546/23595/5500/1111/170506/2237/79677/23468/1763/5591/57187/1017/4998/4436/4172/2146/4171/10951/5111/9937/142/4175/55655
GO_CONDENSED_CHROMOSOME	GO_CONDENSED_CHROMOSOME	203	-0.631916	-2.30226	1e-10	1.46174e-08	1.21922e-08	3470	tags=50%, list=19%, signal=41%	84516/23122/6847/23137/54908/3619/10111/11144/5347/891/113130/64105/23310/64946/4999/5501/2177/55839/23476/55183/6790/259282/7756/57820/55320/701/5253/81929/221150/22920/253635/10734/9770/79003/5810/57405/10128/10592/8467/79902/284058/57122/641/1062/7283/348995/27127/55355/54821/11335/9126/10664/11130/4085/11073/23332/10051/1663/79172/10735/546/1058/11004/348235/672/25936/1111/54820/23219/79677/1…
GO_CONDENSED_CHROMOSOME_CENTROMERIC_REGION	GO_CONDENSED_CHROMOSOME_CENTROMERIC_REGION	106	-0.680859	-2.32228	1e-10	1.46174e-08	1.21922e-08	3470	tags=63%, list=19%, signal=52%	10428/84516/23122/54908/3619/5347/891/64105/23310/64946/4999/5501/55839/6790/259282/7756/55320/701/5253/81929/221150/253635/9770/79003/57405/79902/284058/57122/1062/348995/55355/54821/11335/11130/4085/23332/79172/546/1058/11004/348235/25936/54820/23219/147841/3192/55746/79980/332/81620/9918/9793/10403/64151/8243/9735/9212/699/79682/387103/201161/25909/83540/84295/4751/1063/10615
GO_COVALENT_CHROMATIN_MODIFICATION	GO_COVALENT_CHROMATIN_MODIFICATION	450	-0.468558	-1.817	1e-10	1.46174e-08	1.21922e-08	4622	tags=46%, list=25%, signal=35%	10498/10013/6839/408/983/80854/23133/6879/26122/8841/4204/10782/55257/6419/7936/79813/54934/9112/120892/3622/648/10336/54554/9219/2624/64769/26147/26036/57602/55011/11176/84332/2005/171023/9643/7443/3054/54623/23411/55167/2033/8085/201163/3276/55352/675/6421/54880/79829/25942/23135/472/9575/6877/84312/29072/55904/57634/2122/90780/2091/8861/4297/94104/64324/5245/221477/891/55818/55683/80314/10419/…
GO_DNA_CONFORMATION_CHANGE	GO_DNA_CONFORMATION_CHANGE	240	-0.605477	-2.2464	1e-10	1.46174e-08	1.21922e-08	4265	tags=53%, list=23%, signal=41%	2071/23132/5619/51203/6046/54069/6832/63922/1654/10146/64061/55636/54623/55166/25/80119/257218/2068/4174/6847/23064/22985/3159/1616/10111/1108/5985/5983/891/113130/64105/4683/23310/1107/8520/64946/55839/25836/2968/9131/55320/10721/8208/23522/8450/1105/10541/79075/9400/9025/7520/91687/29855/7155/5928/10592/9557/8467/56916/1069/10973/84181/641/6117/3181/1029/55355/5931/51773/54821/7150/10036/7994/1…
GO_DNA_DEPENDENT_ATPASE_ACTIVITY	GO_DNA_DEPENDENT_ATPASE_ACTIVITY	104	-0.660034	-2.23716	1e-10	1.46174e-08	1.21922e-08	4265	tags=66%, list=23%, signal=51%	2071/23132/6832/63922/1654/10146/55636/80119/6595/2068/4174/23064/10111/11144/1108/5985/5983/4683/1107/4439/5892/55193/2968/10721/1105/79075/9400/7520/7155/5928/9557/8467/56916/10973/84181/641/5889/54821/5982/4176/5965/57680/6596/254394/4173/84296/5981/1663/546/1660/8438/8318/170506/6597/1763/7516/6594/84515/4436/4172/83990/5984/4171/2186/51659/2956/4175/9837/7153
GO_DNA_DEPENDENT_DNA_REPLICATION	GO_DNA_DEPENDENT_DNA_REPLICATION	140	-0.664066	-2.32401	1e-10	1.46174e-08	1.21922e-08	3471	tags=61%, list=19%, signal=50%	4174/23594/5000/54962/201973/90381/3159/5985/5983/5422/4683/7014/4999/56897/898/79733/259282/80174/10721/84268/11232/10189/79075/5423/9400/10926/91607/10269/5424/92667/79892/11200/641/6119/6117/5558/51053/348654/3978/5427/5426/9984/5982/4176/29980/5965/5980/254394/4173/10714/91603/84296/146956/5981/253714/1663/59343/546/23595/8099/8318/2237/5557/1763/11177/8317/81620/9134/26271/55388/1017/4998/41…
GO_DNA_RECOMBINATION	GO_DNA_RECOMBINATION	260	-0.576175	-2.15662	1e-10	1.46174e-08	1.21922e-08	3952	tags=45%, list=22%, signal=36%	27030/10459/125150/22944/10097/55135/57697/80119/675/6421/23503/2068/4174/472/6847/23064/23137/29072/4798/10111/11144/5893/55137/4683/116138/27343/4439/119392/7014/55010/23028/5892/25836/7247/55183/51444/57820/3329/3575/10721/23304/84268/2521/10189/5423/9400/9319/9025/328/9466/7520/7155/158880/7037/56916/641/6929/6119/6117/5889/7374/22976/2072/348654/23075/9984/4176/79728/5965/5980/254394/4173/84…
GO_DNA_REPAIR	GO_DNA_REPAIR	493	-0.538381	-2.09977	1e-10	1.46174e-08	1.21922e-08	3822	tags=45%, list=21%, signal=36%	22944/23411/10097/55135/2033/57697/25/375748/80119/675/1956/257218/6421/545/1054/23503/51567/2068/4174/472/6847/23064/201973/90381/9232/23137/29072/4798/3159/157570/10111/11144/8505/5985/5893/55137/2189/5983/5422/113130/580/4683/23049/27343/143/4439/119392/7014/4521/55010/2175/6749/56897/2177/254225/23028/55929/5892/8930/91875/25836/55170/7319/5433/7341/23201/7832/2968/5429/10463/55183/2873/25928…
GO_DNA_REPLICATION	GO_DNA_REPLICATION	257	-0.624827	-2.33646	1e-10	1.46174e-08	1.21922e-08	3717	tags=58%, list=20%, signal=47%	80119/675/1956/545/23560/25942/4174/23594/472/5000/54962/201973/90381/3159/4784/157570/10361/10111/5985/80169/5983/5422/580/4683/51147/27000/27343/7014/4999/6749/56897/346673/898/163859/5429/79733/259282/80174/51455/10721/8208/6416/114799/84268/11232/10189/10535/79075/5423/9400/10926/5810/91607/10269/5928/63901/5424/92667/23244/79892/11200/5930/641/6119/6117/7126/5558/51053/5931/11198/7150/10036/…
GO_DOUBLE_STRAND_BREAK_REPAIR	GO_DOUBLE_STRAND_BREAK_REPAIR	213	-0.570685	-2.08603	1e-10	1.46174e-08	1.21922e-08	4481	tags=52%, list=25%, signal=39%	4796/7405/25788/25939/6419/84309/2187/10213/84464/9112/151987/10459/125150/10097/55135/675/6421/23503/51567/4174/472/23064/23137/29072/157570/10111/11144/5893/55137/5422/113130/580/4683/27343/119392/55010/254225/23028/5892/25836/7341/55183/51444/10721/2521/5423/9400/9319/9025/7520/64858/158880/55100/9320/56916/11200/641/6119/6117/5889/22976/2072/348654/4176/79728/5965/5980/254394/4173/84296/14695…
GO_HELICASE_ACTIVITY	GO_HELICASE_ACTIVITY	151	-0.640157	-2.26382	1e-10	1.46174e-08	1.21922e-08	4097	tags=62%, list=22%, signal=49%	2071/23132/6832/63922/1654/9416/10146/55636/79009/57697/57062/375748/80119/6595/257218/2068/4174/8449/23064/9775/57634/55760/1665/10111/1108/5985/91646/5983/1662/4683/91351/1107/64848/9044/9188/23405/10847/1656/11218/1974/10721/1105/79075/4343/9400/11325/7520/91607/55601/8886/9557/1655/8467/56916/10973/84181/641/6499/54821/23020/7919/5982/4176/5965/57680/6596/254394/4173/84296/1659/1663/9931/546/…
GO_HISTONE_BINDING	GO_HISTONE_BINDING	192	-0.605949	-2.19402	1e-10	1.46174e-08	1.21922e-08	4487	tags=54%, list=25%, signal=41%	23038/4796/23133/6879/3622/54554/6046/26147/55011/11176/115426/7443/23411/55135/8085/8125/55352/6595/55904/10361/90780/1616/4297/23310/55206/51147/27000/58508/8520/6749/26108/10771/6944/55170/10847/79718/23476/22823/84656/8208/23522/1105/8019/5253/51460/4300/29117/55274/10541/9025/5757/5928/158880/1164/8467/55355/51773/11198/23613/7994/54454/6872/4302/57680/11143/55023/2332/10927/25842/9682/55723…
GO_KINETOCHORE	GO_KINETOCHORE	125	-0.650106	-2.24881	1e-10	1.46174e-08	1.21922e-08	3483	tags=58%, list=19%, signal=48%	10428/25942/84516/23122/1783/54908/3619/5347/4928/891/64105/64946/4999/5501/55839/51164/259282/324/7756/55320/701/5253/81929/221150/253635/9770/79003/57405/79902/284058/57122/7514/1062/348995/55355/54821/11130/4085/23332/79172/1058/11004/348235/2491/25936/54820/23219/147841/3192/23468/55746/79980/332/23279/81930/81620/9793/10403/8243/9735/7175/9212/699/79682/387103/201161/25909/7272/83540/84295/4…
GO_MITOTIC_NUCLEAR_DIVISION	GO_MITOTIC_NUCLEAR_DIVISION	254	-0.522265	-1.95251	1e-10	1.46174e-08	1.21922e-08	3469	tags=44%, list=19%, signal=36%	23122/472/9232/23137/54908/10361/23363/9055/3619/5347/23113/891/113130/64105/23310/10419/10460/5902/54443/9585/55154/25836/80218/11065/6790/324/7756/79884/9493/701/9820/81929/137886/79075/79003/9319/1908/64682/10592/79598/996/23244/2059/3796/11200/23636/6683/1062/1027/7283/8697/9126/348654/11130/8555/29127/4085/55023/23332/10051/55143/152185/9700/991/10735/546/11004/25936/1111/3837/54820/995/5512…
GO_MRNA_PROCESSING	GO_MRNA_PROCESSING	485	-0.48813	-1.90584	1e-10	1.46174e-08	1.21922e-08	5219	tags=52%, list=29%, signal=38%	29896/8458/9128/56254/4154/56259/10179/23210/8241/25804/4869/11017/55119/6628/6631/55696/8189/11157/84950/23398/79882/91746/60625/9589/6428/143884/81608/494115/3312/10657/3550/5356/10291/60493/23283/50628/2967/55339/9584/64895/7936/96764/55544/2071/134353/53981/151987/58155/83759/55596/642843/4691/79753/10772/6936/8621/57721/4670/10465/9416/55147/10236/23435/5094/54623/11051/54439/10250/22944/113…
GO_NUCLEAR_CHROMOSOME_SEGREGATION	GO_NUCLEAR_CHROMOSOME_SEGREGATION	236	-0.580938	-2.15536	1e-10	1.46174e-08	1.21922e-08	3952	tags=48%, list=22%, signal=38%	27030/10459/256126/55166/3834/56984/10097/51451/57697/6421/472/6847/9232/23137/54908/157570/9055/3619/11144/5347/7917/891/113130/64105/23310/55920/10460/2177/55154/25836/898/80218/9113/324/7756/57820/114799/9493/701/81929/55869/10734/79075/79003/9319/55706/7155/64682/10592/996/23244/79892/23636/150465/5889/1062/7283/27127/8697/2072/9126/348654/55294/10664/11130/29127/4085/146956/10051/81610/55143…
GO_NUCLEOSOME_ORGANIZATION	GO_NUCLEOSOME_ORGANIZATION	108	-0.648973	-2.21178	1e-10	1.46174e-08	1.21922e-08	3861	tags=56%, list=21%, signal=44%	64061/54623/55166/257218/29072/3159/4778/1616/64105/8520/64946/55839/6944/55929/10847/55193/55320/8208/23522/6602/10541/9025/5757/91687/29855/5928/8289/8467/6603/196528/6605/55355/5931/51773/11198/10036/7994/10664/25842/55723/7259/6830/6601/79172/6599/546/1058/2491/6597/6662/6594/81611/4171/79682/387103/3148/23270/4678/23198/85453
GO_ORGANELLE_FISSION	GO_ORGANELLE_FISSION	422	-0.465051	-1.80063	1e-10	1.46174e-08	1.21922e-08	3469	tags=37%, list=19%, signal=31%	23122/472/6847/9232/23137/54908/5573/10361/23363/9055/3619/10111/11144/5347/23113/91646/7917/891/113130/64105/23310/10419/10460/811/116138/5902/4439/54443/2175/9585/4599/2177/55154/5892/25836/898/80218/11065/1352/6790/324/7756/79884/57820/113115/23304/55737/84930/9493/701/9820/81929/137886/10734/79075/79003/9319/1908/5810/55706/664/7155/64682/10592/79598/996/1164/23244/2059/3796/23236/11200/23636…
GO_PROTEIN_DNA_COMPLEX_SUBUNIT_ORGANIZATION	GO_PROTEIN_DNA_COMPLEX_SUBUNIT_ORGANIZATION	208	-0.577017	-2.10705	1e-10	1.46174e-08	1.21922e-08	4519	tags=53%, list=25%, signal=40%	2967/6666/6879/51112/80152/7314/2071/7343/6046/54069/55011/11176/64061/54623/55166/26054/6878/257218/2068/4174/5704/9330/29072/3159/4778/1616/11144/5893/64105/8520/64946/5706/55839/6944/55929/10847/55193/1385/2968/54700/55320/8208/23522/8450/6602/2960/10541/79003/9025/5757/91687/29855/5928/8289/9557/8467/6603/1069/6119/6117/51053/1062/6882/196528/6605/55355/5931/51773/11198/10036/7994/10664/9014/…
GO_RECOMBINATIONAL_REPAIR	GO_RECOMBINATIONAL_REPAIR	125	-0.630124	-2.17969	1e-10	1.46174e-08	1.21922e-08	4481	tags=60%, list=25%, signal=46%	4796/25788/25939/2187/10213/84464/151987/10459/125150/10097/55135/675/6421/23503/4174/472/23137/29072/10111/11144/5893/55137/4683/27343/119392/55010/23028/5892/25836/55183/51444/10721/2521/9400/158880/641/6119/6117/5889/2072/348654/4176/79728/5965/5980/254394/4173/84296/23347/253714/8438/8318/672/1111/2237/80010/63979/8317/64110/7516/83695/84515/4172/3980/55159/4171/51659/56893/5932/142/64710/891…
GO_REGULATION_OF_CELL_CYCLE_G2_M_PHASE_TRANSITION	GO_REGULATION_OF_CELL_CYCLE_G2_M_PHASE_TRANSITION	204	-0.545455	-1.9916	1e-10	1.46174e-08	1.21922e-08	3552	tags=46%, list=19%, signal=37%	5707/25942/472/5704/90381/5347/80169/891/1019/4683/1453/55920/95681/5566/5706/4303/5713/9662/84446/7532/85417/23476/79959/51512/6790/80174/121441/5709/10197/10142/7840/5708/7846/11064/5569/7531/22919/57504/115106/1069/641/54801/5889/23354/7283/22976/22994/55031/8555/29980/91603/9738/11073/23332/219736/993/5718/8883/10733/11190/10806/672/1111/54820/995/55125/5717/84131/3161/9928/79184/5087/3320/83…
GO_REGULATION_OF_GENE_EXPRESSION_EPIGENETIC	GO_REGULATION_OF_GENE_EXPRESSION_EPIGENETIC	274	-0.530461	-1.99171	1e-10	1.46174e-08	1.21922e-08	3870	tags=46%, list=21%, signal=37%	9643/11146/23411/2033/8085/53371/8737/1956/57492/79829/64783/10514/1981/25942/23112/3159/57178/9337/4928/221830/27327/80314/8520/83637/57343/9188/23405/5433/7247/22823/55183/8575/29102/23304/6774/5253/81929/6602/23019/7022/7703/4343/80312/55706/121536/10269/25885/26523/5437/5928/7257/29066/51132/8289/84108/1994/8493/1655/8467/23451/10658/23636/79902/57122/3181/5430/57690/6996/348995/4086/113802/2…
GO_RNA_SPLICING	GO_RNA_SPLICING	423	-0.468315	-1.81077	1e-10	1.46174e-08	1.21922e-08	5219	tags=51%, list=29%, signal=37%	29896/8458/9128/4154/56259/10179/23210/5515/8241/25804/4869/11017/55119/6628/6631/55696/8189/11157/84950/23398/91746/60625/9589/6428/143884/81608/494115/3312/7490/10657/3550/5356/10291/23283/50628/55339/9584/96764/55544/53981/151987/58155/83759/55596/4691/79753/10772/6936/8621/57721/4670/10465/9416/10236/23435/5094/11051/10250/11319/6431/6421/282996/9541/64783/10659/6632/3185/283989/6434/3190/230…
GO_RNA_SPLICING_VIA_TRANSESTERIFICATION_REACTIONS	GO_RNA_SPLICING_VIA_TRANSESTERIFICATION_REACTIONS	338	-0.50577	-1.93259	1e-10	1.46174e-08	1.21922e-08	5219	tags=54%, list=29%, signal=39%	29896/9128/4154/56259/10179/23210/8241/25804/4869/11017/6628/6631/55696/8189/11157/84950/23398/91746/60625/9589/6428/143884/81608/494115/3312/10657/3550/5356/10291/23283/50628/55339/96764/53981/58155/83759/55596/4691/79753/10772/6936/8621/57721/4670/10465/9416/10236/5094/11051/10250/6431/6421/64783/10659/6632/3185/6434/3190/8449/23064/8106/140890/54883/9775/10283/79869/10594/84811/6629/1665/51645…
GO_SISTER_CHROMATID_SEGREGATION	GO_SISTER_CHROMATID_SEGREGATION	172	-0.610512	-2.18786	1e-10	1.46174e-08	1.21922e-08	3437	tags=50%, list=19%, signal=41%	472/9232/23137/54908/157570/9055/3619/5347/891/113130/64105/23310/10460/55154/25836/80218/9113/324/7756/114799/9493/701/81929/55869/10734/79075/79003/9319/7155/64682/10592/996/23244/79892/23636/5889/1062/7283/27127/8697/9126/348654/55294/10664/11130/29127/4085/10051/55143/1663/9700/991/10735/546/11004/25936/3837/2237/3192/23126/79980/9787/9928/81930/24137/54627/3833/81620/9918/10403/26271/146909/…
GO_SPINDLE	GO_SPINDLE	342	-0.500681	-1.91295	1e-10	1.46174e-08	1.21922e-08	3110	tags=37%, list=17%, signal=31%	11104/891/805/1453/55920/10460/143/9585/84440/7803/27130/11127/642273/51164/79718/9113/1432/55183/6790/259282/7756/79884/1213/121441/1729/54888/9493/701/84984/221150/7840/22920/57448/85459/79801/137886/2035/292/5423/996/56271/22919/9094/90799/3796/115106/23636/9657/79902/10769/54801/6683/23354/1062/7283/8502/9181/11335/55856/9126/55171/51199/9857/8555/29127/4085/255758/11073/23332/10927/81610/551…
GO_DNA_PACKAGING	GO_DNA_PACKAGING	133	-0.606428	-2.10895	1.84731e-10	2.64284e-08	2.20437e-08	4218	tags=50%, list=23%, signal=39%	5619/51203/6046/54069/64061/54623/55166/257218/6847/22985/3159/1616/891/113130/64105/23310/8520/64946/55839/25836/9131/55320/8208/23522/10541/9025/91687/29855/5928/10592/8467/1029/55355/5931/51773/10036/7994/10664/55870/10051/23347/25842/55723/7259/79172/546/1058/2491/6662/9918/3070/6594/64151/7175/4171/79682/54892/387103/201161/3148/6732/23270/23397/4678/23198/7153/85453
GO_MITOTIC_SISTER_CHROMATID_SEGREGATION	GO_MITOTIC_SISTER_CHROMATID_SEGREGATION	144	-0.59381	-2.09015	2.05865e-10	2.88383e-08	2.40537e-08	3437	tags=48%, list=19%, signal=39%	472/9232/23137/54908/9055/3619/5347/891/113130/64105/23310/10460/55154/25836/80218/324/7756/9493/701/81929/79075/79003/9319/64682/10592/996/23244/23636/1062/7283/8697/348654/11130/29127/4085/10051/55143/9700/991/546/11004/25936/3837/3192/23126/79980/9787/9928/81930/24137/54627/3833/81620/9918/10403/26271/146909/64151/8243/7175/9212/699/7272/83540/4751/23397/1063/990/10615
GO_CILIUM_ORGANIZATION	GO_CILIUM_ORGANIZATION	357	-0.471383	-1.80905	5.26512e-10	7.08054e-08	5.90581e-08	5471	tags=49%, list=30%, signal=35%	5518/166379/7275/84260/5992/57787/84100/23639/83544/5048/9474/6792/51364/146279/1639/9342/116840/153241/54558/57545/79738/55130/7419/55081/123811/80210/57560/8100/10013/1781/5991/55172/84314/55835/80184/983/93323/55112/84071/10121/54930/63917/23322/91147/136332/3064/79583/219844/85478/138639/55212/55722/11158/85302/54806/282809/55717/1641/3842/25809/10097/84902/64518/583/50807/4867/403/51256/2285…
GO_REGULATION_OF_CHROMOSOME_ORGANIZATION	GO_REGULATION_OF_CHROMOSOME_ORGANIZATION	321	-0.488245	-1.86063	6.4248e-10	8.47066e-08	7.06529e-08	4485	tags=49%, list=25%, signal=38%	80854/23133/6879/51112/4204/10782/6419/7936/84464/120892/3622/2624/26147/26036/55011/54464/23293/10459/4137/92345/54623/23411/56984/26054/51451/201163/80119/6421/54880/545/79829/5514/25942/472/54552/9232/23137/54908/55904/3159/90780/10111/5347/80169/4297/94104/64324/3184/221477/908/891/55818/113130/4683/10460/23049/3178/7014/8473/23028/23381/80351/57343/25836/3183/55170/7203/23476/22823/10576/551…
GO_NUCLEAR_CHROMOSOME_TELOMERIC_REGION	GO_NUCLEAR_CHROMOSOME_TELOMERIC_REGION	98	-0.628614	-2.11627	9.16276e-10	1.18482e-07	9.88243e-08	3717	tags=55%, list=20%, signal=44%	80119/675/9878/545/5514/4174/472/5000/10111/80169/4683/8520/6741/7014/4999/5501/56897/23028/80351/5892/79577/10189/328/7520/64858/5424/6117/2072/11335/9984/25913/4176/4173/55226/5431/23347/546/23595/5500/2237/23468/1763/5591/57187/4998/4436/4172/4171/10951/5111/9937/142/4175/55655
GO_DNA_GEOMETRIC_CHANGE	GO_DNA_GEOMETRIC_CHANGE	109	-0.621819	-2.12578	9.83652e-10	1.24794e-07	1.04089e-07	4519	tags=60%, list=25%, signal=45%	2967/25788/7314/2071/23132/6832/63922/1654/10146/55636/80119/2068/4174/23064/3159/10111/1108/5985/5983/4683/1107/2968/10721/8450/1105/79075/9400/7520/9557/56916/1069/10973/84181/641/6117/3181/54821/5982/25913/4176/5965/57680/254394/4173/84296/1663/546/1660/8438/8318/170506/1763/6594/84515/4172/83990/5984/4171/51659/3148/142/3149/4175/9837/7153
GO_GENE_SILENCING	GO_GENE_SILENCING	218	-0.524568	-1.92205	1.18106e-09	1.47064e-07	1.22664e-07	4596	tags=50%, list=25%, signal=38%	6839/23511/4849/57472/90459/23133/4204/26058/4927/648/79753/11176/5530/9643/23411/8085/53371/8737/1956/79829/1981/25942/23112/3159/9337/91646/4928/4686/27327/8520/4848/57343/23405/10847/55571/5433/7247/55183/22955/8575/29102/23304/6774/5253/81929/22916/23019/7703/4343/80312/55706/10269/26523/5437/7257/29066/8289/1994/8493/1655/8467/10658/23636/79902/57122/3181/5430/57690/348995/4086/113802/22880/…
GO_MACROMOLECULE_METHYLATION	GO_MACROMOLECULE_METHYLATION	268	-0.500047	-1.87977	1.65023e-09	2.01748e-07	1.68276e-07	5210	tags=51%, list=28%, signal=37%	56254/25917/196483/64863/79977/7799/79918/5110/6628/1499/10436/5079/9589/57570/7490/10498/6839/55471/80854/4204/10782/6419/7936/117246/79813/5290/96764/54554/9219/151194/54069/26147/55011/11176/84332/57721/79091/51093/5870/51106/54931/54623/23411/51451/8085/3276/55352/79872/54880/64783/221078/63899/29072/55904/25940/2122/90780/2091/4297/79828/94104/91646/64324/387338/55818/10196/10419/79979/58508…
GO_DNA_HELICASE_ACTIVITY	GO_DNA_HELICASE_ACTIVITY	68	-0.688056	-2.19367	4.14727e-09	4.82734e-07	4.02644e-07	4265	tags=72%, list=23%, signal=55%	2071/23132/6832/63922/1654/10146/55636/80119/2068/4174/23064/10111/1108/5985/5983/4683/1107/10721/1105/79075/9400/7520/9557/56916/10973/84181/641/54821/5982/4176/5965/57680/254394/4173/84296/1663/546/1660/8318/170506/1763/84515/4172/83990/5984/4171/51659/4175/9837
GO_REGULATION_OF_CELL_CYCLE_PHASE_TRANSITION	GO_REGULATION_OF_CELL_CYCLE_PHASE_TRANSITION	430	-0.443708	-1.71674	4.51619e-09	5.14693e-07	4.293e-07	3849	tags=42%, list=21%, signal=34%	54623/8945/581/56984/2033/11319/51451/3276/8737/60561/1956/5716/5707/2068/1981/25942/51434/472/5704/90381/54908/55904/10361/5347/9337/80169/7023/891/252983/113130/1019/4683/1453/55920/57521/95681/5566/54443/5706/4848/4303/5713/9662/84446/7532/4193/85417/898/55571/11065/7832/23476/79959/79733/51512/6790/324/7756/80174/7465/121441/5709/10197/678/8450/701/10142/29117/7840/5708/79577/23019/7846/9319/…
GO_METHYLATION	GO_METHYLATION	321	-0.471576	-1.7971	8.23263e-09	8.92842e-07	7.44711e-07	5210	tags=48%, list=28%, signal=35%	56254/25917/196483/64863/84274/79977/64745/7799/79918/5110/6628/1499/10436/5079/57412/9589/57570/7490/10498/6839/55471/80854/4204/10782/2653/6419/7936/117246/79813/5290/96764/29081/54554/9219/151194/54069/26147/55011/11176/84332/57721/79091/51093/5870/51106/54931/54623/23411/51451/8085/3276/55352/114826/79872/54880/64783/221078/63899/29072/55904/25940/2122/90780/2091/4297/79828/94104/91646/64324/…
GO_REGULATION_OF_DNA_METABOLIC_PROCESS	GO_REGULATION_OF_DNA_METABOLIC_PROCESS	314	-0.467358	-1.77819	1.62715e-08	1.70952e-06	1.4259e-06	3994	tags=42%, list=22%, signal=34%	54464/23293/10459/92345/9104/581/23411/10097/55135/201163/80119/1956/545/5514/1054/2068/472/54552/90381/29072/10361/10111/8505/5985/80169/5893/4297/55137/5983/3184/908/4683/10419/27000/23049/143/3178/7014/10728/55010/56897/254225/7644/23028/23381/80351/3183/7203/23201/317/5429/10576/55183/659/9131/3575/167227/10721/55869/8239/3326/2521/10189/79075/9400/7874/9025/9466/7520/10269/56252/158880/55100…
GO_PROTEIN_METHYLATION	GO_PROTEIN_METHYLATION	158	-0.545239	-1.94871	1.79918e-08	1.83298e-06	1.52887e-06	5686	tags=59%, list=31%, signal=41%	79823/9739/2107/9545/4221/5926/9070/64754/115294/56254/196483/7799/79918/5110/6628/1499/5079/10498/6839/55471/80854/4204/10782/6419/7936/79813/54554/151194/26147/55011/84332/79091/5870/54623/23411/51451/8085/3276/55352/54880/29072/55904/25940/2122/90780/2091/4297/94104/64324/55818/10196/10419/58508/8473/23028/57343/55170/7403/7832/54790/23476/22823/55183/26053/55677/55251/84661/9646/80312/55209/9…
GO_CELL_CYCLE_DNA_REPLICATION	GO_CELL_CYCLE_DNA_REPLICATION	63	-0.684679	-2.1501	1.94254e-08	1.9495e-06	1.62606e-06	3471	tags=68%, list=19%, signal=55%	4174/54962/5985/5983/5422/7014/79733/80174/10926/10269/5424/11200/6119/6117/5558/51053/3978/5427/5426/5982/4176/29980/4173/10714/91603/5981/59343/546/23595/8318/2237/5557/1763/8317/81620/26271/4172/5984/4171/79915/5111/4175/9837
GO_PEPTIDYL_LYSINE_MODIFICATION	GO_PEPTIDYL_LYSINE_MODIFICATION	371	-0.453322	-1.7367	2.1072e-08	2.06349e-06	1.72114e-06	4620	tags=47%, list=25%, signal=36%	5351/10013/6839/408/23511/80854/6879/26122/4204/10782/55257/2653/6419/7936/79813/54934/4927/54554/151194/2624/64769/26147/26036/55011/84332/79091/9643/3054/23411/10401/55167/26054/2033/8085/201163/53371/675/54880/79829/25942/54552/9575/6877/29072/10055/55904/57634/2122/57178/90780/8861/5352/4297/64324/4928/7917/55818/55683/80314/51147/8202/58508/8520/51601/23408/8473/83637/8648/23028/4193/10054/5…
GO_REGULATION_OF_CHROMOSOME_SEGREGATION	GO_REGULATION_OF_CHROMOSOME_SEGREGATION	96	-0.6152	-2.06644	2.29138e-08	2.17003e-06	1.81e-06	3936	tags=55%, list=22%, signal=44%	10459/56984/51451/6421/472/9232/23137/54908/5347/891/113130/55920/10460/25836/324/7756/701/55869/9319/64682/996/150465/1062/8697/348654/10664/1457/29127/4085/1663/9700/991/23369/546/11004/2237/79677/3192/9787/4288/81620/10403/26271/7175/9212/699/7272/4751/1894/1063/990/10615/116028
GO_NEGATIVE_REGULATION_OF_CHROMOSOME_ORGANIZATION	GO_NEGATIVE_REGULATION_OF_CHROMOSOME_ORGANIZATION	126	-0.570932	-1.97419	2.61245e-08	2.43974e-06	2.03496e-06	4616	tags=59%, list=25%, signal=44%	3550/6714/23133/6879/6419/84464/26036/55011/54464/23293/10459/23411/56984/51451/80119/54880/25942/472/54552/9232/54908/3159/10111/5347/80169/891/55818/4683/3178/7014/23028/80351/3183/55170/22823/324/7756/167227/701/5253/9319/80312/7520/9320/2072/54454/348654/4302/25913/4085/55226/25842/6830/29028/9700/991/546/672/5927/3192/1786/81620/10403/26271/7175/9212/699/4171/7272/3720/142/1063/1789/7153
GO_MEIOTIC_CELL_CYCLE	GO_MEIOTIC_CELL_CYCLE	227	-0.498445	-1.83764	3.41444e-08	3.10252e-06	2.58778e-06	3437	tags=37%, list=19%, signal=30%	472/5567/6847/9232/5573/10361/10111/11144/5347/91646/7917/4683/23310/811/116138/4439/2175/2177/64848/85417/5892/346673/898/201164/6790/57820/54888/23304/84930/701/10734/9319/5810/55706/7155/10592/1164/24149/23236/6117/5889/7283/27127/2072/9126/146956/10051/10927/993/9700/991/10735/546/29893/8438/995/55329/4880/80010/81930/56907/7156/63979/9918/11022/9134/26271/7516/259266/1017/8243/83990/699/1038…
GO_CELL_CYCLE_CHECKPOINT	GO_CELL_CYCLE_CHECKPOINT	208	-0.508478	-1.85677	3.87675e-08	3.47563e-06	2.89899e-06	3819	tags=48%, list=21%, signal=38%	581/56984/2033/51451/3276/60561/545/5514/472/54962/9575/90381/54908/5347/9337/79968/891/5781/4683/4848/4303/84446/4193/55571/7832/1432/79733/51512/6790/324/7756/7465/54888/701/1386/23019/65123/9319/5810/7155/64858/988/51322/4194/11200/10769/641/1027/5546/7919/57646/348654/11130/8555/9984/4085/29980/91603/146956/11073/7029/8883/991/1869/8318/672/1111/835/995/79184/1763/9656/1739/5591/5325/81620/63…
GO_MITOTIC_SPINDLE	GO_MITOTIC_SPINDLE	116	-0.581954	-2.00436	3.97331e-08	3.51533e-06	2.93211e-06	2469	tags=41%, list=14%, signal=35%	79718/6790/79884/1213/1729/9493/221150/85459/2035/22919/23636/9657/1062/8502/9126/51199/8555/29127/4085/81610/9611/7029/9700/10735/150468/3192/55689/60509/84140/81930/79969/54627/3833/8317/27436/126731/146909/259266/8243/7175/9212/22974/3832/1894/54959/9859/10615
GO_TELOMERE_ORGANIZATION	GO_TELOMERE_ORGANIZATION	143	-0.553081	-1.94583	4.07221e-08	3.55604e-06	2.96606e-06	3994	tags=52%, list=22%, signal=41%	54464/23293/92345/55135/80119/675/545/5514/472/54552/23137/10111/5985/80169/5983/3184/5422/908/4683/23049/3178/7014/10728/23381/80351/5892/3183/7203/898/10576/55183/167227/55869/3326/7874/328/7520/56252/64858/5424/5073/641/6119/6117/5889/3181/5558/2072/1736/5427/5426/5982/25913/22948/10714/55226/5981/546/170506/2237/79677/3192/9887/5557/1763/5591/3320/9134/9212/5984/4751/5111/9937/142/9156
GO_SINGLE_STRANDED_DNA_BINDING	GO_SINGLE_STRANDED_DNA_BINDING	107	-0.592809	-2.02584	4.53738e-08	3.91145e-06	3.2625e-06	3901	tags=54%, list=21%, signal=43%	4137/5094/675/51567/3190/4174/10111/11144/80169/5893/5422/3178/7014/4830/50804/5892/5433/7247/51444/3329/8880/10128/5437/10592/7257/55247/641/6119/6117/3181/5395/2072/7150/25913/4176/5814/254394/4173/10051/1663/23648/1660/8318/51729/170506/3192/5557/7156/55388/84515/4436/4172/4171/3148/5932/64710/4175/10635
GO_METHYLTRANSFERASE_COMPLEX	GO_METHYLTRANSFERASE_COMPLEX	110	-0.579717	-1.98161	4.7087e-08	4.00776e-06	3.34283e-06	4214	tags=49%, list=23%, signal=38%	22847/54554/26147/26036/84332/57721/3054/23411/8085/3276/6878/79872/64783/6632/130557/23135/58499/4297/10419/58508/7403/1876/22823/27043/84661/8242/121536/5978/6635/5928/51230/284058/152485/22976/5931/51605/6872/57680/55006/9682/8731/6045/5929/5927/23054/23126/23468/83732/4591/10765/2146/23512/3720/3066
GO_PROTEIN_CONTAINING_COMPLEX_LOCALIZATION	GO_PROTEIN_CONTAINING_COMPLEX_LOCALIZATION	281	-0.46552	-1.75345	7.28362e-08	5.83036e-06	4.86305e-06	3978	tags=42%, list=22%, signal=33%	23293/55722/11158/10250/3842/64854/53371/54468/6431/6421/3267/403/2288/545/22858/472/8106/9775/55763/55764/29072/79659/26019/51098/29091/4928/4686/55920/23049/7884/6426/6741/7014/167691/51068/4599/26146/65109/5649/11260/23381/6809/6432/55110/11127/79809/5433/117178/22794/3799/55677/57539/4116/9295/1605/55737/81929/5602/6427/1741/22916/22920/57728/10189/1627/55706/9877/11338/84946/84248/54890/5136…
GO_RNA_EXPORT_FROM_NUCLEUS	GO_RNA_EXPORT_FROM_NUCLEUS	134	-0.551923	-1.92371	7.58988e-08	6.00404e-06	5.00791e-06	5578	tags=65%, list=31%, signal=45%	129401/9939/7248/9688/8563/55781/11269/5901/4869/55308/8189/2733/91746/55153/8888/6428/81608/10657/23511/55339/4927/53981/23293/54439/10250/53371/6431/3267/8106/9775/29072/26019/4928/4686/23049/7884/6426/6741/3178/51068/65109/11260/23381/6432/55110/5433/22794/55677/4116/9295/81929/6427/22916/10189/11052/55706/9877/11338/84946/84248/54890/51362/6059/23636/79902/57122/7514/3181/348995/23165/7919/59…
GO_MICROTUBULE_BASED_MOVEMENT	GO_MICROTUBULE_BASED_MOVEMENT	274	-0.464125	-1.74264	9.24946e-08	7.14866e-06	5.96263e-06	4846	tags=40%, list=27%, signal=30%	66008/55130/55081/23247/3312/57560/8100/10013/1781/5991/55112/7314/10121/374654/3064/57584/85478/11158/5870/4137/3834/3842/25809/84062/10097/64518/57662/583/6421/403/22858/1783/55764/8382/79659/51098/79443/127602/54919/23046/282991/6845/55605/7014/167691/9585/55582/26146/347240/11127/79809/117178/636/3799/57539/9493/22920/26985/57728/10125/10947/23095/10128/8701/79989/64792/3796/23224/6683/1062/2…
GO_MRNA_EXPORT_FROM_NUCLEUS	GO_MRNA_EXPORT_FROM_NUCLEUS	109	-0.583501	-1.99479	1.04687e-07	7.98486e-06	6.66009e-06	4800	tags=58%, list=26%, signal=43%	2733/91746/8888/6428/81608/23511/55339/4927/53981/23293/10250/53371/6431/3267/8106/9775/29072/26019/4928/4686/23049/7884/6426/65109/23381/6432/55110/5433/22794/55677/4116/9295/81929/6427/22916/10189/55706/9877/11338/84248/54890/51362/23636/79902/57122/3181/348995/23165/7919/5903/9984/100101267/6830/9883/9887/55746/23279/51692/9631/57187/7175/23225/9972
GO_CATALYTIC_ACTIVITY_ACTING_ON_RNA	GO_CATALYTIC_ACTIVITY_ACTING_ON_RNA	340	-0.443225	-1.69188	1.05689e-07	7.98486e-06	6.66009e-06	4665	tags=42%, list=26%, signal=32%	6036/221120/57505/80222/57472/90459/57176/85441/25788/25939/441250/117246/96764/55718/92935/6832/55703/57721/11062/1654/51093/54464/112487/23293/9416/10146/51106/54931/23357/79009/57697/150962/57062/80119/27297/51567/221078/283989/54938/63899/8449/201973/9775/10594/55760/2091/1665/9337/79828/91646/55278/387338/1662/221830/9924/25973/91351/11128/79979/112479/10667/4848/4839/64848/23438/80745/57038…
GO_CHROMATIN_ASSEMBLY	GO_CHROMATIN_ASSEMBLY	90	-0.604504	-2.00414	1.16817e-07	8.72755e-06	7.27956e-06	4133	tags=52%, list=23%, signal=41%	6046/54069/64061/54623/55166/257218/3159/1616/64105/8520/64946/55839/55320/8208/23522/10541/91687/29855/5928/8467/1029/55355/5931/51773/10036/7994/10664/23347/25842/55723/7259/79172/546/1058/2491/6662/3070/6594/7175/4171/79682/387103/201161/3148/23270/4678/85453
GO_ATP_DEPENDENT_CHROMATIN_REMODELING	GO_ATP_DEPENDENT_CHROMATIN_REMODELING	71	-0.645357	-2.07052	1.23563e-07	9.1301e-06	7.61532e-06	3364	tags=56%, list=18%, signal=46%	27443/1108/64105/1107/64946/55839/6944/55929/3183/10847/55193/55320/9025/5757/91687/5928/8289/8467/56916/6603/6605/55355/5931/51773/57680/6601/79172/6599/1058/2491/57459/6597/86/6594/81611/79682/387103/4678/23198/3066
GO_HISTONE_METHYLATION	GO_HISTONE_METHYLATION	127	-0.558933	-1.93362	1.56165e-07	1.11708e-05	9.31743e-06	5013	tags=54%, list=27%, signal=40%	7799/79918/1499/5079/10498/6839/80854/4204/10782/6419/7936/79813/54554/26147/55011/84332/54623/23411/8085/3276/55352/54880/29072/55904/2122/90780/2091/4297/94104/64324/55818/10419/58508/8473/23028/57343/55170/7403/54790/23476/22823/55183/26053/55677/84661/9646/80312/55209/200424/22976/10664/4302/51742/55870/6830/546/57673/672/5929/6018/9869/79723/10919/1786/4602/2146/23512/3720/1789
GO_REPLICATION_FORK	GO_REPLICATION_FORK	66	-0.647141	-2.04496	1.69796e-07	1.16501e-05	9.71725e-06	3191	tags=59%, list=17%, signal=49%	5985/5983/5422/4683/83637/55929/5892/5429/988/5424/8467/56916/641/6119/6117/5889/5558/7150/5982/29980/5814/10714/84296/5981/253714/10286/8318/5557/9031/1786/29128/55388/7516/4172/5984/51659/5111/11169/8914
GO_SPLICEOSOMAL_COMPLEX	GO_SPLICEOSOMAL_COMPLEX	178	-0.50928	-1.83431	1.86909e-07	1.26947e-05	1.05885e-05	5219	tags=56%, list=29%, signal=40%	29896/8458/9128/56259/25804/55119/6628/6631/55696/11157/84950/23398/60625/143884/494115/3312/3550/5356/10291/8539/58155/55596/4691/79753/6936/4670/10465/9416/10236/10250/6632/3185/6434/3190/8449/140890/54883/9775/10283/10594/84811/6629/1665/51645/10262/3189/10285/6426/3178/55094/153527/50804/55110/3183/10713/10946/57703/51747/22794/9343/4116/84991/3187/79622/51691/10189/220988/11338/55280/23658/6…
GO_HISTONE_METHYLTRANSFERASE_COMPLEX	GO_HISTONE_METHYLTRANSFERASE_COMPLEX	85	-0.610566	-2.00841	2.11384e-07	1.42134e-05	1.18553e-05	4214	tags=52%, list=23%, signal=40%	22847/54554/26147/26036/84332/3054/23411/8085/6878/130557/23135/58499/4297/10419/58508/7403/1876/22823/27043/84661/8242/121536/5978/5928/51230/284058/152485/22976/5931/6872/57680/9682/6045/5929/5927/23054/23126/23468/4591/10765/2146/23512/3720/3066
GO_DNA_INTEGRITY_CHECKPOINT	GO_DNA_INTEGRITY_CHECKPOINT	149	-0.524618	-1.85412	3.92694e-07	2.5887e-05	2.15921e-05	3819	tags=50%, list=21%, signal=40%	581/2033/3276/60561/545/5514/472/54962/9575/90381/5347/9337/79968/891/5781/4683/4848/4303/84446/4193/55571/7832/1432/79733/51512/6790/1386/23019/5810/7155/988/51322/4194/11200/10769/641/1027/7919/57646/8555/9984/29980/91603/146956/11073/7029/8883/1869/8318/672/1111/835/995/79184/1763/9656/5591/5325/81620/63967/83695/1017/4998/4436/57551/55159/25896/83990/6659/5111/990/8914/51514/7153
GO_RNA_LOCALIZATION	GO_RNA_LOCALIZATION	224	-0.479904	-1.76844	4.34592e-07	2.83171e-05	2.3619e-05	3858	tags=43%, list=21%, signal=35%	92345/54439/10250/55135/53371/6431/6421/3267/545/9326/472/8106/9775/29072/9444/2091/26019/10204/4928/908/4686/51602/23049/7884/6426/6741/3178/7014/51068/65109/11260/23381/6432/55110/7203/5433/23039/10576/636/22794/55677/4116/9295/167227/81929/6427/22916/10189/11052/9804/220988/55706/9877/11338/84946/8570/10128/84248/54890/51362/6059/23636/79902/1069/57122/5073/7514/3181/348995/23165/7919/1736/871…
GO_SPINDLE_ORGANIZATION	GO_SPINDLE_ORGANIZATION	163	-0.518245	-1.85517	5.02708e-07	3.21924e-05	2.68514e-05	2379	tags=34%, list=13%, signal=30%	6790/7756/79884/1213/9493/57405/79598/6905/22919/3796/11200/115106/23636/10769/54801/6683/23354/1062/7283/9126/29127/23332/9611/152185/9700/991/10735/546/6491/3837/55125/3192/9371/332/1739/24137/54627/3833/9793/126731/10403/26271/259266/8243/203068/7175/9212/22974/3832/387103/3925/4605/7272/83540/4751/10615
GO_CHROMATIN_ORGANIZATION_INVOLVED_IN_REGULATION_OF_TRANSCRIPTION	GO_CHROMATIN_ORGANIZATION_INVOLVED_IN_REGULATION_OF_TRANSCRIPTION	79	-0.603807	-1.96937	5.62604e-07	3.4706e-05	2.89479e-05	4596	tags=54%, list=25%, signal=41%	6839/23133/4204/648/11176/9643/23411/8085/57492/79829/25942/3159/57178/8520/83637/57343/55183/23304/5253/6602/7703/80312/8289/8493/8467/22880/10155/54454/23347/25842/11240/29028/80336/57673/55729/8318/1111/9869/1786/3070/1788/2146/3066
GO_PEPTIDYL_LYSINE_METHYLATION	GO_PEPTIDYL_LYSINE_METHYLATION	111	-0.560712	-1.92123	5.73745e-07	3.48462e-05	2.90648e-05	5013	tags=56%, list=27%, signal=41%	7799/79918/1499/5079/6839/80854/4204/10782/6419/7936/79813/54554/151194/26147/55011/84332/79091/23411/8085/54880/29072/55904/2122/90780/4297/64324/55818/58508/8473/23028/57343/55170/7403/54790/23476/22823/55183/26053/55677/84661/9646/55209/200424/22976/4302/51742/55870/6830/546/57673/672/5929/6018/9869/79723/10919/1786/4602/2146/23512/3720/1789
GO_METHYLATED_HISTONE_BINDING	GO_METHYLATED_HISTONE_BINDING	66	-0.632519	-1.99876	6.103e-07	3.63155e-05	3.02904e-05	2993	tags=38%, list=16%, signal=32%	23310/51147/26108/10771/22823/84656/1105/5253/23613/6872/57680/2332/10927/9682/546/5929/5927/23468/54799/9425/29128/54892/2956/23512/84733
GO_CILIARY_BASAL_BODY_PLASMA_MEMBRANE_DOCKING	GO_CILIARY_BASAL_BODY_PLASMA_MEMBRANE_DOCKING	95	-0.58536	-1.96551	6.85783e-07	4.04492e-05	3.37382e-05	4597	tags=64%, list=25%, signal=48%	1781/55835/80184/983/93323/10121/54930/23322/91147/55722/85302/54806/84902/4867/26123/5347/132320/1453/95681/79600/5566/347240/9662/7532/79959/121441/10142/7840/7846/11064/7531/79598/54903/22919/115106/9657/1069/54801/23354/7283/22994/26005/117177/9738/23332/22832/10733/11190/10806/54820/55125/79867/84131/3320/9793/5577/203068/4751/80321/22981/10382
GO_DNA_REPLICATION_INITIATION	GO_DNA_REPLICATION_INITIATION	37	-0.73028	-2.08997	7.70418e-07	4.5046e-05	3.75724e-05	3471	tags=70%, list=19%, signal=57%	4174/23594/5000/90381/5422/4683/4999/56897/898/5558/5427/5426/4176/4173/23595/8318/5557/81620/9134/55388/1017/4998/4172/4171/990/4175
GO_MICROTUBULE_CYTOSKELETON_ORGANIZATION_INVOLVED_IN_MITOSIS	GO_MICROTUBULE_CYTOSKELETON_ORGANIZATION_INVOLVED_IN_MITOSIS	129	-0.538035	-1.86953	8.27982e-07	4.79944e-05	4.00317e-05	3349	tags=45%, list=18%, signal=37%	23122/29072/54908/9055/79187/5347/891/10460/55154/6790/7756/79884/1213/9493/137886/57405/3688/79598/6905/3796/11200/23636/10769/6683/1062/7283/9181/9126/29127/4085/23332/152185/9700/991/10735/1058/6491/3837/54820/55125/3192/9371/332/24137/54627/3833/126731/10403/8243/7175/9212/22974/3832/3925/4605/7272/83540/4751
GO_MICROTUBULE	GO_MICROTUBULE	405	-0.420403	-1.62053	1.29584e-06	7.38409e-05	6.159e-05	3413	tags=39%, list=19%, signal=32%	9112/220134/54930/2009/7074/6760/23322/374654/51203/27230/7280/1808/357/1641/51175/4137/3834/25809/57662/344148/10381/403/2288/23122/51174/27185/1783/157922/9055/3619/79659/79187/25941/5347/55137/127602/23046/11104/908/805/55605/1453/55920/80258/143/9585/55582/6991/347240/27130/57326/11127/7203/642273/283349/23271/10576/636/51512/6790/259282/324/3799/7756/79884/1213/8631/23499/10376/56890/84557/9…
GO_MITOTIC_SPINDLE_ORGANIZATION	GO_MITOTIC_SPINDLE_ORGANIZATION	102	-0.560717	-1.8977	1.4003e-06	7.84637e-05	6.54458e-05	3292	tags=47%, list=18%, signal=39%	9055/79187/5347/891/10460/55154/6790/7756/79884/1213/9493/57405/79598/6905/3796/11200/23636/10769/6683/1062/7283/9126/29127/23332/152185/991/10735/6491/3837/55125/3192/9371/332/24137/54627/3833/126731/10403/8243/7175/9212/22974/3832/3925/4605/7272/83540/4751
GO_CHROMOSOME_SEPARATION	GO_CHROMOSOME_SEPARATION	85	-0.589946	-1.94059	1.44347e-06	7.95565e-05	6.63573e-05	4067	tags=53%, list=22%, signal=41%	1459/10459/56984/51451/57697/472/9232/54908/5347/891/23310/10460/324/7756/701/9400/9319/7155/64682/996/56916/1062/8697/2072/348654/1457/4085/146956/9700/991/80010/9787/7156/81620/9918/10403/26271/7175/9212/699/7272/23397/1063/990/7153
GO_SPINDLE_ASSEMBLY	GO_SPINDLE_ASSEMBLY	104	-0.567966	-1.9251	1.52069e-06	8.31309e-05	6.93387e-05	2379	tags=38%, list=13%, signal=33%	6790/7756/79884/9493/79598/22919/3796/11200/115106/54801/23354/9126/29127/23332/9611/152185/991/10735/3837/55125/3192/9371/332/24137/54627/3833/126731/26271/259266/8243/203068/7175/9212/22974/3832/387103/4605/4751/10615
GO_CYTOSKELETON_DEPENDENT_INTRACELLULAR_TRANSPORT	GO_CYTOSKELETON_DEPENDENT_INTRACELLULAR_TRANSPORT	177	-0.491522	-1.76695	1.68534e-06	9.06578e-05	7.56168e-05	3948	tags=41%, list=22%, signal=33%	11158/5870/4137/3842/84062/57662/6421/403/22858/55764/79659/51098/79443/282991/6845/7014/167691/26146/11127/79809/117178/636/440193/3799/57539/10376/8263/9493/22920/26985/57728/7846/10125/10947/23095/10128/79989/64792/23224/6683/22994/80179/26160/63971/4976/51626/255758/150737/26958/28981/92104/54820/55288/4744/3192/55704/79929/9928/9371/63915/3797/3091/51361/54874/24137/140735/66000/2319/547/203…
GO_PROTEIN_ACETYLTRANSFERASE_COMPLEX	GO_PROTEIN_ACETYLTRANSFERASE_COMPLEX	90	-0.576464	-1.91118	1.79857e-06	9.5981e-05	8.00568e-05	4467	tags=56%, list=24%, signal=42%	6879/26122/55257/54934/80018/64769/9643/3054/55167/2033/6878/26009/6877/57634/55683/6873/80314/51147/8473/55929/51616/80218/10902/27097/51562/23522/55274/56970/151050/6885/9913/80155/51230/284058/60560/1387/6871/9898/51773/9767/7994/11143/117143/8295/8089/23326/339287/55689/86/27154
GO_REGULATION_OF_DNA_REPLICATION	GO_REGULATION_OF_DNA_REPLICATION	103	-0.559489	-1.89637	1.82071e-06	9.63972e-05	8.04039e-05	3707	tags=52%, list=20%, signal=42%	675/1956/545/23560/54962/90381/157570/10361/5985/80169/5983/4683/7014/56897/79733/80174/6416/114799/79075/10926/91607/10269/23244/11200/5930/641/7126/51053/9126/5982/29980/26057/57695/91603/27101/59343/546/23595/1660/55704/10919/1763/890/8317/81620/26271/1017/3980/5984/79915/5111/64710/990/8914
GO_TUBULIN_BINDING	GO_TUBULIN_BINDING	323	-0.433722	-1.65233	2.19415e-06	0.000113842	9.49545e-05	4317	tags=42%, list=24%, signal=33%	220134/120892/54930/2009/7074/374654/51203/3064/54462/889/1808/1641/4137/3834/57662/5997/675/128344/403/23287/2597/23122/197335/29072/8851/157922/9055/79187/85458/5347/23046/282991/11104/10018/55605/55920/4830/9217/9585/55582/4599/26146/347240/22983/84446/5892/11127/401236/642273/55342/23271/23139/440193/324/3799/7756/79884/8631/23499/1605/56890/84557/9493/7840/85459/5423/23095/283431/285753/2707…
GO_CONDENSED_NUCLEAR_CHROMOSOME	GO_CONDENSED_NUCLEAR_CHROMOSOME	92	-0.571136	-1.90633	2.43406e-06	0.000123057	0.000102641	4064	tags=46%, list=22%, signal=36%	11243/27030/256126/675/6847/3619/10111/11144/5347/891/64105/23310/23476/6790/57820/55320/701/22920/10734/79003/5810/10128/641/7283/27127/9126/11073/79172/546/1058/672/1111/79980/9918/10403/8243/9212/699/10388/83540/4751/23397
GO_NEGATIVE_REGULATION_OF_GENE_EXPRESSION_EPIGENETIC	GO_NEGATIVE_REGULATION_OF_GENE_EXPRESSION_EPIGENETIC	83	-0.587662	-1.93542	2.47051e-06	0.000123968	0.0001034	4596	tags=54%, list=25%, signal=41%	6839/23133/4204/648/26147/11176/9643/23411/8085/79829/25942/3159/80314/8520/57343/22823/55183/23304/5253/7703/80312/121536/5928/8289/8493/8467/22880/10155/5931/54454/23347/25842/29028/57673/55729/8318/9869/1786/3070/1788/2146/23512/3720/1789/3066
GO_UBIQUITIN_LIKE_PROTEIN_SPECIFIC_PROTEASE_ACTIVITY	GO_UBIQUITIN_LIKE_PROTEIN_SPECIFIC_PROTEASE_ACTIVITY	116	-0.544488	-1.87532	2.83566e-06	0.000141237	0.000117804	2731	tags=28%, list=15%, signal=24%	11274/389856/10713/90268/23358/23032/8078/8239/54764/9100/84132/7874/78990/158880/84669/27005/7398/8975/55031/84640/57646/9097/57695/205564/59343/29843/9736/23326/79184/159195/51029/25862/7345
GO_ESTABLISHMENT_OF_RNA_LOCALIZATION	GO_ESTABLISHMENT_OF_RNA_LOCALIZATION	191	-0.484227	-1.75231	2.99582e-06	0.000147036	0.000122641	3827	tags=43%, list=21%, signal=35%	54439/10250/53371/6431/6421/3267/545/472/8106/9775/29072/9444/26019/10204/4928/4686/23049/7884/6426/6741/3178/7014/51068/65109/11260/23381/6432/55110/5433/23039/22794/55677/4116/9295/81929/6427/22916/10189/11052/9804/220988/55706/9877/11338/84946/8570/10128/84248/54890/51362/6059/23636/79902/1069/57122/7514/3181/348995/23165/7919/87178/5903/9984/100101267/2332/6830/59343/9883/9908/1660/3192/9887/…
GO_NUCLEOBASE_CONTAINING_COMPOUND_TRANSPORT	GO_NUCLEOBASE_CONTAINING_COMPOUND_TRANSPORT	235	-0.456413	-1.69037	3.56135e-06	0.000167458	0.000139675	3978	tags=41%, list=22%, signal=33%	23293/10237/60386/54439/10250/53371/8737/6431/6421/3267/8106/9775/29072/9444/26019/10204/4928/4686/23049/7884/6426/6741/3178/7014/51068/65109/11260/23381/51000/6432/55110/5433/23039/22794/55677/4116/9295/81929/6427/22916/10189/11052/292/84275/9804/220988/9197/55706/9877/11338/84946/8570/10128/84248/54890/51362/55186/6059/23636/79902/1069/57122/7514/3181/348995/23165/7919/87178/5903/9984/100101267…
GO_NUCLEAR_SPECK	GO_NUCLEAR_SPECK	384	-0.411431	-1.57953	3.68232e-06	0.000171944	0.000143417	5520	tags=48%, list=30%, signal=34%	322/9939/85403/55589/3835/56478/9263/79005/54815/6651/27339/80196/10346/8926/9128/84441/7486/8241/4869/11221/79960/79068/64766/79882/3428/91746/57018/9589/665/6428/91647/7490/3550/3304/5356/10291/3984/9584/124245/144455/51008/8539/26959/6046/26051/83759/10772/57602/11176/8621/9394/1654/10465/4137/23435/54439/10250/10401/644353/6431/6421/79872/9541/64783/6729/8106/140890/54883/22985/9775/23137/559…
GO_REGULATION_OF_SISTER_CHROMATID_SEGREGATION	GO_REGULATION_OF_SISTER_CHROMATID_SEGREGATION	75	-0.601641	-1.94491	3.74102e-06	0.000173143	0.000144417	3936	tags=56%, list=22%, signal=44%	10459/56984/51451/6421/472/9232/23137/54908/5347/891/113130/10460/25836/324/7756/701/55869/9319/64682/996/1062/8697/348654/10664/4085/1663/9700/991/546/2237/3192/9787/81620/10403/26271/7175/9212/699/7272/1063/990/116028
GO_NUCLEAR_REPLICATION_FORK	GO_NUCLEAR_REPLICATION_FORK	41	-0.694236	-2.02667	3.7595e-06	0.000173143	0.000144417	1830	tags=54%, list=10%, signal=48%	988/5424/8467/56916/6119/6117/5558/7150/5814/10714/84296/253714/10286/8318/5557/9031/55388/4172/51659/5111/11169/8914
GO_CENTRIOLE	GO_CENTRIOLE	132	-0.522579	-1.81666	3.91795e-06	0.000179213	0.00014948	4752	tags=52%, list=26%, signal=38%	123811/80210/8100/3304/55835/80184/10121/3064/145508/219844/80705/11158/85302/54806/282809/84902/4682/51174/197335/51098/5347/9786/84461/132320/95681/163786/347240/9662/11127/79959/6790/121441/56890/84984/7840/85459/6093/10198/22873/54903/54875/57489/3796/9657/1069/10769/7283/9851/26005/51199/9857/55165/9738/152185/22832/10733/6491/11190/10806/54535/55125/84131/55704/899/126731/85444/9859/7153
GO_DNA_REPLICATION_ORIGIN_BINDING	GO_DNA_REPLICATION_ORIGIN_BINDING	24	-0.795933	-2.11322	4.06751e-06	0.000184797	0.000154137	3471	tags=88%, list=19%, signal=71%	4174/23594/5000/5422/4999/3329/4176/254394/11143/4173/1663/23595/1660/8318/55388/84515/4998/4172/4171/990/4175
GO_MEIOTIC_CELL_CYCLE_PROCESS	GO_MEIOTIC_CELL_CYCLE_PROCESS	171	-0.484549	-1.73766	4.32469e-06	0.000193861	0.000161698	3437	tags=36%, list=19%, signal=30%	472/6847/9232/5573/10361/10111/11144/5347/91646/7917/23310/811/116138/4439/2175/2177/5892/898/6790/57820/54888/23304/84930/701/10734/9319/5810/55706/7155/10592/1164/23236/5889/7283/2072/146956/10051/993/9700/991/546/29893/8438/995/80010/81930/56907/63979/9918/11022/9134/26271/259266/83990/699/10388/84057/7272/83540/2956/23397/7153
GO_DAMAGED_DNA_BINDING	GO_DAMAGED_DNA_BINDING	64	-0.61314	-1.93022	4.47493e-06	0.000199268	0.000166207	2503	tags=45%, list=14%, signal=39%	163859/5429/51455/10721/8450/4595/5423/328/5810/7520/64858/55247/5424/641/6119/6117/7374/6996/1387/2072/25913/672/2237/4436/3148/2956/5932/5111/9937
GO_MRNA_TRANSPORT	GO_MRNA_TRANSPORT	147	-0.511924	-1.8058	4.75286e-06	0.000210252	0.000175369	4800	tags=53%, list=26%, signal=39%	2733/91746/64901/8888/6428/81608/23511/55339/4927/53981/23293/10250/53371/6431/3267/8106/9775/29072/9444/26019/10204/4928/4686/23049/7884/6426/3178/65109/23381/6432/55110/5433/23039/22794/55677/4116/9295/81929/6427/22916/10189/220988/55706/9877/11338/8570/10128/84248/54890/51362/23636/79902/1069/57122/7514/3181/348995/23165/7919/5903/9984/100101267/2332/6830/59343/9883/9908/1660/9887/55746/23279/…
GO_CELL_CYCLE_G1_S_PHASE_TRANSITION	GO_CELL_CYCLE_G1_S_PHASE_TRANSITION	256	-0.44399	-1.66121	5.32892e-06	0.000234194	0.000195339	3849	tags=43%, list=21%, signal=35%	54623/581/2033/11319/3276/8737/1956/1981/4174/23594/472/5000/55904/8065/9337/5422/6198/891/252983/1019/57521/4999/51379/4848/4193/898/55571/1876/7832/9113/23476/3400/79733/51512/6790/7465/10197/4863/8450/29117/79577/23019/328/10926/91607/143384/3688/10385/4194/23236/11200/1033/10769/6119/6117/5558/8462/51053/1027/1029/5962/55294/9510/5427/5426/6872/4176/26057/4173/57695/81610/993/59343/58480/7029…
GO_NUCLEAR_TRANSPORT	GO_NUCLEAR_TRANSPORT	342	-0.412534	-1.57617	6.40984e-06	0.000274175	0.000228686	4800	tags=46%, list=26%, signal=34%	2733/91746/55153/64901/8888/6428/81608/10657/144165/6310/23511/50628/55339/8841/51684/126549/120892/4927/6815/55374/53981/5494/9670/23293/5530/26953/23435/54439/10250/3842/53371/8125/92335/6431/3267/5514/3840/6632/8106/9775/29072/3159/26019/10204/55027/2932/4928/9147/4686/580/60468/51319/5781/6934/55437/811/23049/7884/6426/6741/5566/3178/5501/51068/23214/55198/65109/7545/11260/23381/4193/55929/64…
GO_DNA_STRAND_ELONGATION	GO_DNA_STRAND_ELONGATION	23	-0.788396	-2.06205	6.44254e-06	0.000274175	0.000228686	3235	tags=87%, list=18%, signal=72%	10111/5983/5422/4683/64858/3978/5426/25913/4176/4173/10714/84296/1763/4172/3980/5984/51659/5111/64710/9837
GO_PROTEIN_MODIFICATION_BY_SMALL_PROTEIN_REMOVAL	GO_PROTEIN_MODIFICATION_BY_SMALL_PROTEIN_REMOVAL	286	-0.432367	-1.63312	6.81257e-06	0.000286298	0.000238799	3886	tags=31%, list=21%, signal=25%	84749/171023/3054/26054/64854/2033/8737/5716/5707/8027/79589/5704/4798/83737/10010/367/580/64426/5706/4303/8473/5713/11274/4193/51616/389856/10713/90268/7189/2873/324/23358/23032/5709/10197/8078/5708/8239/56970/54764/9100/9804/5423/84132/7874/64750/1080/78990/158880/6885/84669/4194/27005/7398/4086/8975/55252/3607/55031/84640/57646/9097/8533/57695/205564/9738/993/5718/59343/29843/991/8295/672/5528…
GO_DNA_STRAND_ELONGATION_INVOLVED_IN_DNA_REPLICATION	GO_DNA_STRAND_ELONGATION_INVOLVED_IN_DNA_REPLICATION	17	-0.834255	-2.04728	8.01321e-06	0.000332598	0.000277416	1230	tags=76%, list=7%, signal=71%	3978/5426/4176/4173/10714/84296/1763/4172/3980/5984/51659/5111/9837
GO_MICROTUBULE_ASSOCIATED_COMPLEX	GO_MICROTUBULE_ASSOCIATED_COMPLEX	148	-0.497095	-1.75395	8.74471e-06	0.00035636	0.000297236	3401	tags=35%, list=19%, signal=29%	27185/1783/7804/79659/127602/23046/55605/8723/9585/55582/6991/347240/7802/11127/51164/6790/3799/6780/9493/10513/22920/23095/7531/8701/3796/115106/54801/23354/1062/9053/63971/51626/255758/55143/11004/54820/10048/9928/9371/3797/332/56992/81930/24137/3833/140735/146909/547/7175/9212/3832/10112
GO_REGULATION_OF_GENE_SILENCING	GO_REGULATION_OF_GENE_SILENCING	108	-0.539917	-1.84011	9.04495e-06	0.000364181	0.00030376	3818	tags=53%, list=21%, signal=42%	23411/53371/8737/1956/79829/1981/25942/3159/4928/27327/57343/5433/6774/5253/81929/80312/55706/10269/26523/5437/1994/1655/23636/79902/57122/5430/348995/22880/10155/23165/54454/5903/100101267/2332/5431/9611/25842/29028/9883/23369/1660/55729/8318/4613/8087/9869/55746/57510/103/23279/10526/1786/9631/1017/7175/23225/9972
GO_INNATE_IMMUNE_RESPONSE_IN_MUCOSA	GO_INNATE_IMMUNE_RESPONSE_IN_MUCOSA	15	-0.850271	-2.03519	9.38682e-06	0.000373134	0.000311227	1245	tags=27%, list=7%, signal=25%	1672/820/92747/4057
GO_MICROTUBULE_ORGANIZING_CENTER_ORGANIZATION	GO_MICROTUBULE_ORGANIZING_CENTER_ORGANIZATION	128	-0.517163	-1.79221	9.43379e-06	0.000373134	0.000311227	5373	tags=59%, list=29%, signal=42%	2648/57787/5048/1639/23177/116840/4869/153241/1499/8850/57132/55835/983/93323/7405/54930/91147/64793/55722/51175/3834/675/84552/4682/50855/23122/9648/5347/1107/5902/163786/9662/84446/11127/117178/79959/6790/79884/23032/56890/9475/7840/85459/137886/54875/115106/23636/1069/10769/7514/54801/23354/22994/9851/26005/348654/51199/9738/23332/152185/10733/6491/11190/10806/672/1111/54820/55125/4591/9371/89…
GO_REGULATION_OF_HISTONE_METHYLATION	GO_REGULATION_OF_HISTONE_METHYLATION	64	-0.601198	-1.89263	1.0022e-05	0.000389527	0.0003249	4485	tags=56%, list=25%, signal=43%	80854/4204/10782/7936/26147/55011/54623/23411/54880/55904/90780/4297/94104/64324/55818/8473/23028/57343/55170/23476/22823/55183/26053/55677/9646/80312/22976/10664/4302/6830/546/672/1786/4602/3720/1789
GO_POSITIVE_REGULATION_OF_CELL_CYCLE_PROCESS	GO_POSITIVE_REGULATION_OF_CELL_CYCLE_PROCESS	275	-0.432593	-1.62219	1.05494e-05	0.000403035	0.000336168	4622	tags=47%, list=25%, signal=36%	10498/5356/7161/4849/57472/55835/983/1761/4204/896/144455/134353/5581/51203/4850/1654/4041/115426/54623/581/2033/3276/1956/6421/3643/10514/1981/25942/472/23137/55904/8851/10361/9337/891/252983/113130/1019/55920/57521/5902/5566/51379/9585/4848/4303/84440/4193/25836/898/55571/11065/7832/23476/79733/51512/6790/80174/9475/8450/9493/11113/79577/23019/85459/137886/1908/328/10926/57504/4194/23236/11200/…
GO_RNA_3_END_PROCESSING	GO_RNA_3_END_PROCESSING	142	-0.498017	-1.7496	1.07554e-05	0.000404019	0.000336988	4717	tags=55%, list=26%, signal=41%	541466/9939/8563/10768/79033/56254/57117/8189/79882/6428/81608/118460/23283/55339/90459/64895/7936/134353/53981/102723631/642843/6832/54931/54623/11051/10250/6431/8106/9775/79869/2091/1477/10914/891/4686/6829/580/7884/6426/6741/55149/65109/6432/55110/58490/5433/22794/4116/9295/9810/25888/6427/22916/79577/5393/9646/10189/11052/9877/11338/22828/51362/904/55197/5073/7919/1736/1479/87178/9984/23248/1…
GO_REGULATION_OF_MRNA_PROCESSING	GO_REGULATION_OF_MRNA_PROCESSING	140	-0.499427	-1.74783	1.14819e-05	0.000428912	0.000357751	5350	tags=54%, list=29%, signal=38%	10768/6651/27339/29896/56254/4154/10179/23210/8241/4869/79882/91746/9589/6428/494115/10657/7936/83759/4691/10772/54623/11051/6431/64783/10659/6434/3190/8106/140890/79869/10262/9967/4928/10914/891/4686/6829/580/9588/6426/3178/10656/58517/6432/57703/55677/4116/84991/9810/3191/6427/22916/79577/9646/11052/11338/6733/5978/1655/904/10658/3181/7072/27316/9513/55796/84081/2332/6830/1660/170506/8087/3192/…
GO_MODIFICATION_DEPENDENT_PROTEIN_BINDING	GO_MODIFICATION_DEPENDENT_PROTEIN_BINDING	138	-0.513865	-1.79434	1.21088e-05	0.000447361	0.00037314	3334	tags=36%, list=18%, signal=30%	55904/10594/4297/7917/23310/51147/27000/254225/26108/10771/23476/22823/84656/1105/8019/5253/4300/29117/3416/54764/9666/23118/83932/23613/124930/54454/6872/57680/55023/2332/10927/9682/546/8805/5929/5927/23468/6597/55689/165918/79184/54799/9425/29128/54892/56893/2956/23512/23198/84733
GO_PROTEIN_ACETYLATION	GO_PROTEIN_ACETYLATION	195	-0.458851	-1.66339	1.21088e-05	0.000447361	0.00037314	4467	tags=48%, list=24%, signal=36%	6879/26122/4204/55257/54934/80018/2624/64769/26036/55011/4137/9643/3054/23411/55167/2033/201163/675/79829/25942/26151/9575/6877/57634/157570/90780/8861/4297/2932/7917/55683/80314/51147/8202/8520/8473/8648/55929/51616/10847/80218/10902/26053/84656/55677/27097/51562/23522/114799/29117/55274/1386/7703/85459/79075/151050/10269/55209/6885/9913/5563/80155/51230/284058/60560/22976/1387/6871/28999/51773/…
GO_MITOTIC_SPINDLE_ASSEMBLY	GO_MITOTIC_SPINDLE_ASSEMBLY	55	-0.632453	-1.94355	1.2733e-05	0.000465309	0.00038811	2361	tags=51%, list=13%, signal=44%	7756/79884/9493/79598/3796/11200/9126/29127/23332/152185/991/10735/3837/55125/3192/9371/332/24137/54627/3833/126731/8243/7175/9212/22974/3832/4605/4751
GO_NEGATIVE_REGULATION_OF_ORGANELLE_ORGANIZATION	GO_NEGATIVE_REGULATION_OF_ORGANELLE_ORGANIZATION	358	-0.406366	-1.55896	1.35984e-05	0.00048636	0.000405668	4092	tags=37%, list=22%, signal=29%	23256/9026/26036/55011/54464/23293/27124/9637/10459/4137/84749/3834/23411/56984/57662/51451/201163/80119/130271/5716/54880/2288/3998/51256/4682/4233/25942/23122/472/54552/9232/54908/3159/5573/157922/10111/2395/5347/80169/5217/891/55818/4683/3178/10449/7014/23028/80351/3183/55170/7111/23271/22823/324/7756/167227/56890/701/5253/114088/2764/292/9319/80312/1191/5810/7520/664/6711/79598/9320/22919/574…
GO_MICROTUBULE_BASED_TRANSPORT	GO_MICROTUBULE_BASED_TRANSPORT	179	-0.470837	-1.69627	1.40781e-05	0.000500854	0.000417758	4904	tags=45%, list=27%, signal=33%	4131/66008/55081/23247/3312/57560/8100/5991/55112/7314/10121/3064/57584/11158/5870/4137/3842/25809/84062/57662/6421/403/22858/55764/8382/79659/51098/79443/282991/6845/7014/167691/55582/26146/11127/79809/117178/636/3799/57539/9493/22920/26985/57728/10125/10947/23095/10128/8701/79989/64792/23224/6683/22994/26160/63971/4976/51626/255758/150737/27148/26958/28981/92104/54820/55288/4744/3192/9371/63915…
GO_SIGNAL_TRANSDUCTION_BY_P53_CLASS_MEDIATOR	GO_SIGNAL_TRANSDUCTION_BY_P53_CLASS_MEDIATOR	259	-0.433747	-1.62196	1.46712e-05	0.000519207	0.000433065	3819	tags=50%, list=21%, signal=40%	10498/7161/4849/57472/983/6879/7314/144455/79813/3622/51741/9219/1460/64769/1459/4850/83596/581/23411/2033/3276/6878/675/5716/94241/545/10514/6875/3190/472/6877/8851/9521/10111/1108/27330/5985/9337/7023/5983/7917/891/340485/580/4683/6873/10419/51147/84154/1107/8445/4848/4839/6749/23028/4193/51616/91875/55170/55571/7832/54700/28996/1432/79733/51512/6790/83860/29117/23019/9100/5810/10269/5928/8493/…
GO_MRNA_3_END_PROCESSING	GO_MRNA_3_END_PROCESSING	96	-0.546949	-1.83718	1.53072e-05	0.000538876	0.000449471	4948	tags=61%, list=27%, signal=45%	8189/79882/6428/81608/23283/55339/64895/7936/134353/53981/642843/54623/11051/10250/6431/8106/9775/79869/1477/10914/891/4686/6829/580/7884/6426/55149/65109/6432/55110/58490/5433/22794/4116/9295/9810/25888/6427/22916/79577/9646/10189/11052/9877/11338/22828/51362/904/55197/7919/1479/87178/9984/23248/1478/80336/170506/51692/57187
GO_REGULATION_OF_MICROTUBULE_BASED_PROCESS	GO_REGULATION_OF_MICROTUBULE_BASED_PROCESS	212	-0.451441	-1.65041	1.60253e-05	0.000558313	0.000465683	4099	tags=49%, list=22%, signal=38%	153241/1499/57542/4131/25876/55130/8850/57132/10013/3304/55835/4204/10274/220134/91147/64793/85478/27124/4137/3834/57662/583/26054/25/2288/4682/4233/23122/8851/157922/79187/85458/5347/5058/2932/10460/5902/26146/401236/79809/2064/23271/79959/636/6790/324/79884/1213/23499/1729/56890/9475/10142/221150/7840/85459/137886/79598/8701/22919/5563/23636/10769/7514/6683/1027/22994/6904/9181/9126/348654/5119…
GO_TRANSFERASE_COMPLEX_TRANSFERRING_PHOSPHORUS_CONTAINING_GROUPS	GO_TRANSFERASE_COMPLEX_TRANSFERRING_PHOSPHORUS_CONTAINING_GROUPS	248	-0.439957	-1.64207	1.70212e-05	0.000586928	0.00048955	4968	tags=47%, list=27%, signal=35%	5425/9519/10623/91/5294/6874/6917/22863/92/5828/2967/983/7405/10983/6879/896/9133/5290/5634/55718/2071/55703/8621/129685/10459/54623/2957/9821/6878/27297/9655/3643/5257/2068/6875/30849/4217/6877/8851/5573/122809/8408/5422/891/221830/1019/6873/11128/905/5291/5287/23085/85417/51616/58490/898/5433/2968/27097/83860/79577/2960/11232/9646/5631/10621/9400/55209/2081/25885/901/5218/5437/1164/5288/5424/68…
GO_REGULATION_OF_TRANSCRIPTION_INVOLVED_IN_G1_S_TRANSITION_OF_MITOTIC_CELL_CYCLE	GO_REGULATION_OF_TRANSCRIPTION_INVOLVED_IN_G1_S_TRANSITION_OF_MITOTIC_CELL_CYCLE	28	-0.735666	-2.00525	1.74348e-05	0.00059812	0.000498886	2506	tags=57%, list=14%, signal=49%	5422/898/1876/23476/4863/8462/7029/6241/1869/8318/81620/26271/4998/7298/5111/990
GO_NEGATIVE_REGULATION_OF_CELL_CYCLE_PROCESS	GO_NEGATIVE_REGULATION_OF_CELL_CYCLE_PROCESS	315	-0.419068	-1.59314	1.94969e-05	0.000662108	0.000552258	3837	tags=40%, list=21%, signal=32%	3834/581/56984/2033/51451/3276/8737/60561/5716/5514/4682/5707/472/5704/90381/9232/54908/5573/5347/9337/7023/891/1019/4683/80314/811/6015/7014/5706/4848/4303/5713/84446/4193/55571/1876/7832/317/79733/51512/6790/324/7756/7465/5709/10197/678/56890/701/29117/5708/79577/23019/3326/7703/9319/5810/91607/5928/84108/10385/4194/11200/10769/641/1911/1027/1029/5931/55031/11335/348654/8555/4085/29980/91603/11…
GO_MITOTIC_CELL_CYCLE_CHECKPOINT	GO_MITOTIC_CELL_CYCLE_CHECKPOINT	159	-0.480621	-1.71701	2.15962e-05	0.000718875	0.000599606	3819	tags=48%, list=21%, signal=38%	581/56984/2033/51451/3276/60561/5514/472/54962/90381/54908/5347/9337/891/4683/4848/4303/84446/4193/55571/7832/79733/51512/6790/324/7756/7465/701/1386/23019/65123/9319/7155/64858/4194/11200/10769/641/1027/5546/348654/11130/4085/29980/91603/146956/11073/7029/8883/991/1869/672/835/995/9656/1739/5591/5325/81620/63967/10403/1017/4998/9735/4436/7175/57551/9212/55159/699/7272/6659/5111/1063/990/7153
GO_INTERSTRAND_CROSS_LINK_REPAIR	GO_INTERSTRAND_CROSS_LINK_REPAIR	48	-0.645114	-1.93848	2.17783e-05	0.000721364	0.000601683	3776	tags=65%, list=21%, signal=51%	7314/2187/84464/57697/375748/545/2189/2175/2177/5892/64789/9025/64858/6119/6117/7398/2072/254394/2176/146956/55215/55120/2178/165918/84515/55159/29089/2956/9937/64710/10635
GO_DNA_REPLICATION_INDEPENDENT_NUCLEOSOME_ORGANIZATION	GO_DNA_REPLICATION_INDEPENDENT_NUCLEOSOME_ORGANIZATION	36	-0.684053	-1.94927	2.20339e-05	0.000726254	0.000605761	3011	tags=61%, list=16%, signal=51%	64105/8520/64946/55839/55320/91687/29855/5928/8467/55355/5931/51773/11198/25842/55723/79172/546/1058/2491/79682/387103/4678
GO_SPINDLE_POLE	GO_SPINDLE_POLE	160	-0.480772	-1.71933	2.24131e-05	0.000735149	0.00061318	3337	tags=37%, list=18%, signal=30%	54908/9055/5347/11104/891/805/10460/9585/642273/51164/9113/1432/6790/259282/121441/84984/7840/57448/137886/56271/9094/90799/3796/115106/23636/10769/7283/8502/9126/55171/51199/8555/4085/255758/11073/81610/1663/991/10735/10733/54820/150468/3192/79980/9787/79184/84140/54627/9793/259266/8243/9735/9212/22974/3832/4751/1063/990/10615
GO_DNA_REPLICATION_CHECKPOINT	GO_DNA_REPLICATION_CHECKPOINT	16	-0.824014	-1.98752	2.27165e-05	0.000737902	0.000615477	1069	tags=62%, list=6%, signal=59%	91603/11073/8883/8318/1763/81620/63967/4998/990/8914
GO_MRNA_BINDING	GO_MRNA_BINDING	248	-0.437254	-1.63199	2.3066e-05	0.000745215	0.000621577	4131	tags=41%, list=23%, signal=32%	58155/79048/4691/79753/57721/1654/4670/10146/10236/23435/11051/54439/3658/64783/10659/1981/22950/6434/23367/9775/8562/3182/9444/55095/7073/4928/3184/51247/4686/6829/811/8761/7884/6426/149041/6741/3178/65109/58517/51081/50804/3183/1656/7247/132430/51747/678/9810/23589/3191/22916/5393/2521/11052/220988/9877/8570/54845/84248/26156/22828/1994/1655/23451/10658/5073/25929/23524/3181/80004/10949/7072/55…
GO_GENE_SILENCING_BY_RNA	GO_GENE_SILENCING_BY_RNA	144	-0.496861	-1.7489	2.31633e-05	0.000745215	0.000621577	3752	tags=43%, list=21%, signal=34%	53371/8737/1956/1981/23112/9337/91646/4928/4686/27327/4848/23405/55571/5433/7247/8575/29102/6774/81929/22916/23019/4343/55706/10269/26523/5437/7257/29066/1994/1655/10658/23636/79902/57122/3181/5430/57690/348995/4086/113802/23165/5903/100101267/2332/5431/9611/9931/9883/23369/1660/4613/8087/55746/57510/103/23279/10526/9631/11022/7175/23225/9972
GO_REGULATION_OF_TELOMERE_MAINTENANCE_VIA_TELOMERE_LENGTHENING	GO_REGULATION_OF_TELOMERE_MAINTENANCE_VIA_TELOMERE_LENGTHENING	60	-0.605363	-1.90525	2.42845e-05	0.000777566	0.00064856	5399	tags=68%, list=30%, signal=48%	8550/5570/65057/8658/4216/1499/79618/5609/6714/84464/54464/23293/92345/80119/545/472/54552/80169/908/3178/7014/23381/80351/3183/7203/10576/167227/7520/5073/3181/2072/1736/25913/22948/55226/170506/3192/9887/9212/4751/142
GO_SISTER_CHROMATID_COHESION	GO_SISTER_CHROMATID_COHESION	47	-0.648208	-1.934	2.5571e-05	0.000811034	0.000676475	3352	tags=60%, list=18%, signal=49%	6421/23137/157570/5347/113130/25836/80218/114799/701/55869/10734/79075/23244/79892/5889/27127/9126/55294/10664/1663/9700/991/10735/546/2237/23126/8243/699
GO_MEIOTIC_CHROMOSOME_SEGREGATION	GO_MEIOTIC_CHROMOSOME_SEGREGATION	77	-0.575245	-1.86912	2.77188e-05	0.000870941	0.000726443	3952	tags=43%, list=22%, signal=34%	27030/256126/10097/57697/472/6847/9232/11144/5347/7917/2177/898/57820/701/10734/9319/55706/7155/10592/5889/2072/146956/10051/9700/80010/9134/83990/699/10388/7272/83540/23397/7153
GO_PROTEIN_DNA_COMPLEX	GO_PROTEIN_DNA_COMPLEX	110	-0.514008	-1.757	2.84648e-05	0.000890221	0.000742524	5098	tags=54%, list=28%, signal=39%	23649/4869/92797/5425/1499/50485/5356/2967/4796/6666/5076/2071/5619/1482/2033/4801/257218/6667/6670/4778/80169/5893/5422/6934/7014/84656/23522/2960/7520/988/5437/5424/6119/6117/5558/6654/7150/7994/25913/29980/5814/10714/84296/10286/1058/23595/8318/5927/5557/5591/4172/5469/51659/5111/4800/23512/221656/142/9837
GO_CELLULAR_PROCESS_INVOLVED_IN_REPRODUCTION_IN_MULTICELLULAR_ORGANISM	GO_CELLULAR_PROCESS_INVOLVED_IN_REPRODUCTION_IN_MULTICELLULAR_ORGANISM	324	-0.413095	-1.5739	2.89677e-05	0.000901755	0.000752145	3820	tags=29%, list=21%, signal=23%	25809/581/583/8085/51465/675/4867/6595/3267/85315/55779/6875/472/6847/80025/8382/5573/203523/10361/57178/9444/90780/11144/5347/91646/2189/7073/6198/891/55818/5566/2175/64848/26108/346673/6422/55342/1656/23139/201164/1730/6790/57820/11218/54888/23304/2475/84930/84223/9319/9025/1080/3688/22873/79989/10658/27125/4090/5889/6654/1672/2176/2120/91603/80336/6045/2119/4880/81930/51361/56907/163589/9425/6…
GO_CILIARY_BASAL_BODY	GO_CILIARY_BASAL_BODY	116	-0.51854	-1.78595	3.00528e-05	0.000926949	0.000773159	4775	tags=53%, list=26%, signal=39%	23002/57787/6792/79960/2121/55081/123811/80210/8100/55835/80184/6787/23322/374654/55212/11158/85302/54806/282809/55717/583/128344/51256/22858/27185/55764/51098/9786/95681/167691/26146/23085/27152/117178/2909/57539/121441/84984/22920/22873/54903/79989/57489/1069/7283/22994/26005/26160/51626/9231/150737/11190/10806/28981/92104/84131/55704/84140/126731/4291/1063
GO_CATALYTIC_STEP_2_SPLICEOSOME	GO_CATALYTIC_STEP_2_SPLICEOSOME	83	-0.558087	-1.83802	3.07558e-05	0.000944301	0.000787632	4964	tags=60%, list=27%, signal=44%	6628/55696/23398/60625/5356/10291/55596/4670/9416/10236/10250/6632/3185/3190/9775/10283/10594/6629/51645/6426/3178/55094/55110/3183/10946/57703/9343/4116/3187/10189/220988/6635/988/51362/1655/23451/23524/3181/51340/23020/27316/57819/1659/10492/10286/6638/23450/3192/5411/8899
GO_MICROTUBULE_BINDING	GO_MICROTUBULE_BINDING	239	-0.436368	-1.62113	3.25327e-05	0.000985359	0.000821878	4317	tags=42%, list=24%, signal=32%	220134/120892/54930/2009/7074/374654/51203/54462/889/1808/1641/4137/3834/57662/403/2597/23122/197335/157922/9055/79187/5347/23046/11104/10018/55605/55920/9217/9585/55582/4599/26146/347240/22983/11127/55342/23271/23139/440193/324/3799/7756/79884/8631/23499/56890/84557/9493/7840/85459/5423/23095/283431/285753/27072/10128/56896/11043/22919/3796/1069/6683/1062/9181/9857/29127/63971/4976/23332/2332/81…
GO_MIDBODY	GO_MIDBODY	170	-0.46841	-1.67625	3.94155e-05	0.0011539	0.000962455	5061	tags=48%, list=28%, signal=35%	5901/27309/9798/64780/6840/55777/58525/57149/57132/57553/983/7405/9727/6513/283489/7184/23331/84062/201163/403/23503/1500/5727/55763/60412/9055/3619/5347/11104/221477/55920/10190/54443/9585/5501/84440/5911/5291/54902/10640/6790/9493/11113/57448/79801/9025/11064/51097/23636/54536/6683/1062/8502/5962/55770/55165/29127/63971/90293/55226/55143/1663/23265/127933/3192/9816/9928/9371/60509/332/24137/546…
GO_HISTONE_EXCHANGE	GO_HISTONE_EXCHANGE	42	-0.658364	-1.94165	3.96889e-05	0.0011539	0.000962455	3011	tags=55%, list=16%, signal=46%	64105/64946/55839/6944/55929/10847/55320/9025/5757/91687/5928/8467/55355/5931/51773/79172/1058/2491/81611/79682/387103/4678/23198
GO_NEGATIVE_REGULATION_OF_MITOTIC_CELL_CYCLE	GO_NEGATIVE_REGULATION_OF_MITOTIC_CELL_CYCLE	303	-0.416411	-1.58033	3.98035e-05	0.0011539	0.000962455	3837	tags=39%, list=21%, signal=31%	3834/581/56984/2033/51451/3276/8737/25/60561/1956/5716/5514/9368/5707/472/5704/54962/90381/9232/54908/54475/5347/9337/891/1019/4683/5706/4848/4303/5713/64848/84446/4193/55571/7832/79733/51512/6790/324/7756/7465/5709/10197/678/701/29117/5708/1386/79577/23019/65123/9319/91607/7155/64858/10385/4194/11200/10769/641/1027/1029/5546/7976/55031/348654/220042/11130/87178/8555/4085/29980/91603/146956/11073…
GO_PEPTIDE_N_ACETYLTRANSFERASE_ACTIVITY	GO_PEPTIDE_N_ACETYLTRANSFERASE_ACTIVITY	72	-0.573172	-1.84423	4.06079e-05	0.00116687	0.000973274	4817	tags=57%, list=26%, signal=42%	8850/8888/26122/54934/80018/64769/3054/2033/675/79829/9575/6877/55683/80314/8202/8520/8473/8648/51616/10847/80218/27097/23522/114799/55274/1386/151050/9913/80155/51230/284058/60560/1387/6871/51773/7994/6872/11143/117143/23326/79969
GO_PROTEIN_LOCALIZATION_TO_CHROMOSOME	GO_PROTEIN_LOCALIZATION_TO_CHROMOSOME	72	-0.573016	-1.84373	4.06079e-05	0.00116687	0.000973274	5368	tags=67%, list=29%, signal=47%	65057/91272/8658/9183/27085/23514/10498/3550/983/51112/283489/55011/55166/55135/675/545/472/54552/29072/54908/157570/5347/908/113130/55920/7014/80351/25836/7203/10576/55869/79003/7520/6117/1736/10664/25913/254394/22948/546/1058/81620/10403/84515/4436/2146/9212/7272
GO_NUCLEAR_EXPORT	GO_NUCLEAR_EXPORT	193	-0.451021	-1.6351	4.13701e-05	0.00118371	0.000987323	5511	tags=61%, list=30%, signal=43%	9939/7248/9688/56478/10892/8563/55781/10768/11269/3313/5901/4869/55308/55696/8189/2733/91746/55153/64901/8888/6428/81608/10657/6310/23511/55339/126549/4927/6815/53981/5494/23293/54439/10250/53371/92335/6431/3267/8106/9775/29072/26019/10204/2932/4928/9147/4686/580/5781/6934/55437/811/23049/7884/6426/6741/5566/3178/51068/23214/65109/11260/23381/4193/6432/55110/5433/23039/51512/22794/55677/4116/9295…
GO_REGULATION_OF_CYTOKINESIS	GO_REGULATION_OF_CYTOKINESIS	87	-0.544085	-1.80151	4.31907e-05	0.00123057	0.00102641	3759	tags=47%, list=21%, signal=38%	201163/675/23503/30849/29072/9055/3619/79187/5347/805/9585/84440/79733/6790/79884/9493/28964/11113/57448/23636/1069/10769/6683/8502/80179/55660/8555/29127/63971/90293/9738/10733/9928/9371/54627/9212/201161/25909/1894/10112/990
GO_HISTONE_H3_K4_METHYLATION	GO_HISTONE_H3_K4_METHYLATION	52	-0.611828	-1.86445	4.35118e-05	0.00123449	0.00102967	4407	tags=56%, list=24%, signal=42%	6419/7936/54554/55011/84332/8085/54880/55904/90780/4297/58508/8473/23028/55170/7403/54790/26053/84661/9646/200424/22976/55870/57673/672/5929/6018/1786/4602/1789
GO_RNA_HELICASE_ACTIVITY	GO_RNA_HELICASE_ACTIVITY	73	-0.568959	-1.83091	4.57597e-05	0.0012874	0.00107381	5434	tags=60%, list=30%, signal=43%	9704/83479/11269/1973/55308/23586/60625/25788/6832/1654/9416/10146/79009/57697/57062/8449/9775/55760/1665/91646/1662/91351/64848/9188/1656/11218/1974/4343/11325/55601/8886/1655/6499/23020/7919/1659/1660/56919/9879/170506/90957/11056/83990/79665
GO_SPINDLE_MICROTUBULE	GO_SPINDLE_MICROTUBULE	60	-0.595024	-1.87271	4.72954e-05	0.00132506	0.00110522	3633	tags=60%, list=20%, signal=48%	403/23122/9055/5347/805/1453/143/11127/6790/259282/79884/1213/221150/22920/85459/5423/996/22919/3796/1062/7283/23332/348235/3192/9371/84140/332/81930/24137/126731/146909/9735/9212/3832/10615/827
GO_S_ADENOSYLMETHIONINE_DEPENDENT_METHYLTRANSFERASE_ACTIVITY	GO_S_ADENOSYLMETHIONINE_DEPENDENT_METHYLTRANSFERASE_ACTIVITY	133	-0.499195	-1.73603	5.08136e-05	0.00141772	0.00118251	5686	tags=57%, list=31%, signal=40%	79823/9739/79066/4221/9070/64754/115294/25917/196483/64863/84274/7799/79918/5110/10436/57412/57570/10498/6839/55471/80854/6419/117246/79813/151194/57721/79091/51093/51106/54931/51451/8085/3276/221078/63899/29072/2122/2091/4297/79828/64324/387338/51805/10196/10419/79979/58508/4839/80745/55170/55251/54888/55783/339175/81627/55209/90826/64216/23070/80204/51605/60487/7172/55870/55006/8731/6894/5929/9…
GO_NUCLEAR_PORE	GO_NUCLEAR_PORE	89	-0.529366	-1.75323	5.17742e-05	0.00143855	0.00119988	3143	tags=39%, list=17%, signal=33%	53371/3267/3840/55161/10204/4928/5902/11260/7341/23039/81929/55706/23636/79902/1069/57122/348995/54830/23165/5903/100101267/4085/59343/9883/3841/10527/3837/55746/23279/9631/7175/23225/3838/25909/9972
GO_NUCLEOSOME_BINDING	GO_NUCLEOSOME_BINDING	54	-0.615702	-1.88935	5.41309e-05	0.00149785	0.00124934	2755	tags=44%, list=15%, signal=38%	6749/254225/3183/22823/84656/5928/8289/8467/6603/6605/11198/4302/6830/6601/6599/57459/79366/6597/165918/86/29128/6594/9324/3066
GO_POSITIVE_REGULATION_OF_CYTOKINESIS	GO_POSITIVE_REGULATION_OF_CYTOKINESIS	39	-0.662705	-1.90805	5.57114e-05	0.00152899	0.00127532	2176	tags=38%, list=12%, signal=34%	9585/9493/11113/23636/6683/8502/8555/29127/9928/9371/54627/9212/201161/1894/990
GO_G0_TO_G1_TRANSITION	GO_G0_TO_G1_TRANSITION	44	-0.631433	-1.86176	5.86461e-05	0.0015965	0.00133163	2994	tags=59%, list=16%, signal=50%	80314/6015/4303/1876/317/7703/5928/84108/4194/1911/5931/11335/7029/6241/6045/1869/672/1111/23468/10919/8317/83695/5469/2146/5932/23512
GO_CYTOKINESIS	GO_CYTOKINESIS	153	-0.469633	-1.66971	5.90621e-05	0.00160134	0.00133566	3809	tags=39%, list=21%, signal=31%	10097/201163/675/403/23503/30849/27443/29072/9055/3619/79187/5347/805/54443/9585/84440/54902/79733/6790/324/79884/9475/9493/9820/28964/11113/57448/6093/6711/9094/23636/1069/10769/6683/8502/80179/55660/55165/8555/29127/63971/90293/9738/9700/1058/10733/9928/9371/24137/56907/54627/9212/201161/3925/25909/1894/10112/4628/990
GO_ATTACHMENT_OF_SPINDLE_MICROTUBULES_TO_KINETOCHORE	GO_ATTACHMENT_OF_SPINDLE_MICROTUBULES_TO_KINETOCHORE	29	-0.704129	-1.92809	6.13658e-05	0.00165049	0.00137666	3062	tags=59%, list=17%, signal=49%	891/55920/324/7756/81929/79003/1062/29127/11004/3192/81620/10403/9212/83540/4751/1894/10615
GO_NUCLEAR_PERIPHERY	GO_NUCLEAR_PERIPHERY	129	-0.494033	-1.71664	6.22285e-05	0.00166703	0.00139045	1871	tags=28%, list=10%, signal=25%	1822/22828/56916/57122/641/3181/64395/22976/8507/22880/790/23165/7919/9126/55660/9984/4841/10735/10238/8089/3192/9360/24137/29128/26502/4602/8243/7175/1788/387103/25909/4001/6732/5111/1063/9972
GO_MOTOR_ACTIVITY	GO_MOTOR_ACTIVITY	134	-0.483349	-1.6847	6.67605e-05	0.0017743	0.00147992	3396	tags=32%, list=19%, signal=26%	1783/79659/57530/127602/23046/84952/55605/9585/55582/6991/347240/79784/7802/11127/3799/9493/10513/23095/8701/3796/1062/140465/80179/9126/63971/51626/4646/11004/9928/9371/3797/4430/56992/81930/24137/3833/140735/146909/547/3832/4651/10112/4628
GO_REGULATION_OF_DNA_REPAIR	GO_REGULATION_OF_DNA_REPAIR	105	-0.524305	-1.78481	6.76205e-05	0.00179008	0.00149309	3936	tags=49%, list=22%, signal=38%	6419/84309/2187/151987/10459/23411/10097/55135/1956/1054/29072/8505/5893/55137/7014/55010/56897/254225/23028/23201/5429/55183/10721/2521/9400/9025/158880/55100/9320/7398/10155/23347/1663/1660/672/1111/165918/79184/56907/5591/63979/64110/56893/2305/5111/142/7913/2139/8914/10635/116028
GO_REGULATION_OF_MRNA_SPLICING_VIA_SPLICEOSOME	GO_REGULATION_OF_MRNA_SPLICING_VIA_SPLICEOSOME	102	-0.513142	-1.73668	6.87123e-05	0.00181185	0.00151124	5974	tags=58%, list=33%, signal=39%	221662/9733/10921/5936/79066/9939/6651/27339/29896/4154/10179/23210/8241/4869/91746/9589/6428/494115/10657/83759/4691/10772/6431/64783/10659/6434/3190/140890/10262/9967/4928/4686/9588/6426/3178/10656/58517/6432/57703/4116/84991/3191/6427/11338/6733/5978/1655/10658/3181/7072/27316/9513/55796/84081/2332/8087/3192/135295/6732
GO_CHROMOSOME_LOCALIZATION	GO_CHROMOSOME_LOCALIZATION	72	-0.56306	-1.81169	7.0773e-05	0.00185203	0.00154476	3841	tags=40%, list=21%, signal=32%	55166/10097/472/54908/4928/891/113130/81929/79003/23636/150465/1062/8697/81610/55143/152185/11004/3837/54820/3192/9787/9928/81930/3833/81620/10403/83540/1063/10615
GO_3_5_DNA_HELICASE_ACTIVITY	GO_3_5_DNA_HELICASE_ACTIVITY	14	-0.826504	-1.9563	8.47821e-05	0.00216318	0.00180429	1554	tags=71%, list=8%, signal=65%	10973/641/4176/84296/1660/8318/4171/51659/4175/9837
GO_DNA_BIOSYNTHETIC_PROCESS	GO_DNA_BIOSYNTHETIC_PROCESS	181	-0.448905	-1.61834	8.52533e-05	0.00216318	0.00180429	3994	tags=44%, list=22%, signal=34%	54464/23293/10459/92345/9104/23411/55135/80119/545/472/54552/6847/201973/10111/5985/80169/5245/5983/3184/5422/908/27000/27343/143/3178/7014/10728/56897/23381/80351/3183/7203/5429/10576/659/51455/167227/10721/3326/11232/79075/9100/5423/7520/286826/5424/55666/5073/6119/6117/3181/83932/7919/1736/3978/5427/5426/5982/25913/5980/4931/22948/10714/55226/7083/5981/3192/9887/4880/3320/3980/9212/5984/4751/7…
GO_POSITIVE_REGULATION_OF_CELL_CYCLE	GO_POSITIVE_REGULATION_OF_CELL_CYCLE	364	-0.395127	-1.51725	9.07306e-05	0.00228492	0.00190583	4622	tags=45%, list=25%, signal=35%	10498/5356/7161/4849/57472/22954/6714/55835/983/1761/4204/6419/896/144455/134353/5581/1845/51203/10795/4850/1654/4041/115426/3054/54623/581/2033/3276/25/675/1956/5716/6421/3643/5514/10514/1981/25942/472/23137/55904/8851/10361/9337/7023/10018/221477/6198/891/252983/113130/1019/5781/55920/57521/811/5902/5566/51379/151195/9585/4848/905/4303/84440/64848/4193/25836/898/55571/11065/7832/23476/79733/515…
GO_ANATOMICAL_STRUCTURE_HOMEOSTASIS	GO_ANATOMICAL_STRUCTURE_HOMEOSTASIS	397	-0.382247	-1.47368	9.41428e-05	0.00234449	0.00195551	3994	tags=33%, list=22%, signal=26%	54464/23293/51542/282809/7033/12/53832/92345/581/55135/583/80119/675/1956/545/5514/2651/472/54552/23137/25937/171392/10111/8861/3845/5985/80169/5983/3184/5422/10413/908/580/5781/4683/490/23049/3178/7014/10728/167691/23381/80351/5892/231/7032/3183/7203/898/3920/10576/55183/7189/760/167227/56890/4588/55869/5166/3326/7874/328/7520/56252/64858/54903/5424/7037/11171/4982/9657/5073/641/11272/6119/6117/…
GO_N_ACETYLTRANSFERASE_ACTIVITY	GO_N_ACETYLTRANSFERASE_ACTIVITY	90	-0.524736	-1.73968	9.44236e-05	0.00234449	0.00195551	4473	tags=51%, list=24%, signal=39%	138050/26122/54934/80018/64769/10/3054/2033/675/79829/26151/9575/6877/157570/55683/80314/8202/8520/8473/8648/51616/10847/80218/27097/23522/114799/55274/1386/151050/9913/80155/51230/284058/57106/60560/6605/1387/6871/51773/7994/6872/11143/55226/117143/23326/79969
GO_PROTEIN_ACYLATION	GO_PROTEIN_ACYLATION	238	-0.425324	-1.57939	9.44908e-05	0.00234449	0.00195551	4841	tags=47%, list=26%, signal=35%	79683/254887/8850/8877/8888/2752/408/6879/26122/4204/55257/54934/5494/80018/2624/64769/26036/55011/4137/9643/3054/23411/55167/2033/201163/675/79829/25942/26151/9575/6877/57634/157570/90780/8861/4297/2932/7917/55683/80314/9397/79844/51147/51104/8202/8520/8473/8648/55929/51616/55146/10847/80218/55733/10902/26053/84656/55677/27097/51562/23522/114799/29117/55274/1386/7703/85459/79075/151050/10269/552…
GO_TRANSFERASE_ACTIVITY_TRANSFERRING_ONE_CARBON_GROUPS	GO_TRANSFERASE_ACTIVITY_TRANSFERRING_ONE_CARBON_GROUPS	196	-0.445678	-1.61679	9.49567e-05	0.00234739	0.00195793	5182	tags=43%, list=28%, signal=31%	25917/196483/64863/84274/64745/7799/79918/5110/10436/57412/57570/10498/6839/55471/80854/2653/6419/117246/79813/96764/29081/151194/57721/79091/51093/51106/54931/51451/8085/3276/114826/221078/63899/29072/25940/2122/2091/4297/79828/64324/387338/51805/10196/10419/79979/58508/4839/80745/55170/124512/55251/54888/55783/339175/81627/55209/90826/64216/23070/113802/790/80204/51605/60487/79730/7172/92342/55…
GO_NUCLEOBASE_METABOLIC_PROCESS	GO_NUCLEOBASE_METABOLIC_PROCESS	36	-0.660509	-1.88218	9.71738e-05	0.00239339	0.00199631	2659	tags=47%, list=15%, signal=40%	23028/1503/2475/5631/3251/4329/790/10606/4522/5471/56474/8833/6240/7298/2766/6470/7498
GO_DOUBLE_STRAND_BREAK_REPAIR_VIA_BREAK_INDUCED_REPLICATION	GO_DOUBLE_STRAND_BREAK_REPAIR_VIA_BREAK_INDUCED_REPLICATION	11	-0.86674	-1.90019	0.000102029	0.0025038	0.00208839	1165	tags=82%, list=6%, signal=77%	4176/4173/84296/8318/8317/4172/4171/51659/4175
GO_CENTROMERE_COMPLEX_ASSEMBLY	GO_CENTROMERE_COMPLEX_ASSEMBLY	37	-0.662121	-1.89491	0.000103706	0.00252747	0.00210814	3011	tags=73%, list=16%, signal=61%	51112/80152/54069/55166/26054/64105/64946/55839/55320/79003/91687/5928/8467/1062/55355/5931/51773/79172/1058/2491/23126/3070/79682/387103/201161/1063/4678
GO_PEPTIDYL_LYSINE_ACETYLATION	GO_PEPTIDYL_LYSINE_ACETYLATION	164	-0.466444	-1.668	0.000105743	0.00256685	0.00214098	4467	tags=49%, list=24%, signal=38%	6879/26122/4204/55257/54934/2624/64769/26036/55011/9643/3054/23411/55167/2033/201163/675/79829/25942/9575/6877/57634/90780/8861/4297/7917/55683/80314/51147/8202/8520/8473/8648/55929/51616/10847/80218/10902/26053/84656/55677/27097/51562/23522/114799/29117/55274/1386/7703/151050/10269/55209/6885/9913/5563/51230/284058/22976/1387/6871/28999/51773/9767/7994/10664/6872/11143/117143/57673/8295/672/1111…
GO_UBIQUITIN_LIKE_PROTEIN_TRANSFERASE_ACTIVITY	GO_UBIQUITIN_LIKE_PROTEIN_TRANSFERASE_ACTIVITY	391	-0.385251	-1.48091	0.000106316	0.00257146	0.00214483	5366	tags=43%, list=29%, signal=31%	8924/7328/9443/27339/80196/9189/144699/90025/5987/56254/149603/8452/84708/152006/151636/7337/56852/27338/7322/26268/10293/57542/56888/153830/65264/154214/29945/89970/84085/54542/1161/22954/80829/57630/9690/283450/51506/285533/6048/9867/80028/26036/4850/23291/6400/115426/55072/8945/54941/10401/55167/55008/85363/51465/257160/257218/79872/494470/54880/5193/26046/79589/7267/83737/57178/84937/196394/1…
GO_PROTEIN_SERINE_THREONINE_KINASE_ACTIVITY	GO_PROTEIN_SERINE_THREONINE_KINASE_ACTIVITY	424	-0.380615	-1.47251	0.000108998	0.0026269	0.00219107	3733	tags=30%, list=20%, signal=25%	8737/92335/1956/5257/545/4214/22858/53944/2068/23235/202374/472/30849/5567/4217/5598/23604/51135/8573/27330/5347/5583/8408/5058/55872/22853/2932/6198/23043/1019/1453/11329/55437/23049/65267/5566/8445/22983/84446/1024/23139/2968/9113/23476/28996/1432/659/817/6790/673/1196/140901/6416/2475/9475/84930/701/5602/11113/8491/25778/6093/5584/1612/4750/657/6733/2081/5218/7204/8493/5596/6885/5563/11200/107…
GO_NUCLEAR_ENVELOPE	GO_NUCLEAR_ENVELOPE	449	-0.374079	-1.45041	0.000114728	0.00275512	0.00229802	3902	tags=31%, list=21%, signal=25%	147991/55326/10966/581/23411/53371/3710/25/9821/1956/3643/3267/163183/64783/9805/3840/23560/84629/6434/2597/84516/4925/9330/114882/221264/23333/51649/7779/10456/55161/5058/10204/4928/5422/1019/80314/811/51530/27000/5902/4521/4599/55787/5130/11260/80351/127845/23190/7341/2776/23039/3767/55183/22794/11270/23/9801/83860/81929/7108/3482/55706/10269/2081/664/10128/30832/51230/23236/124491/23636/79902/…
GO_CILIARY_TIP	GO_CILIARY_TIP	46	-0.616453	-1.83074	0.0001257	0.00298661	0.0024911	4775	tags=59%, list=26%, signal=43%	55081/80210/57560/8100/55112/51684/374654/22858/55764/79659/51098/26146/11127/79809/57539/22920/57728/79989/64792/26160/51626/150737/28981/9371/3797/140735/6608
GO_TELOMERE_MAINTENANCE_VIA_TELOMERE_LENGTHENING	GO_TELOMERE_MAINTENANCE_VIA_TELOMERE_LENGTHENING	78	-0.553399	-1.80077	0.000131958	0.00309566	0.00258206	5399	tags=64%, list=30%, signal=45%	8550/5570/65057/8658/4216/54433/1499/79618/5609/6714/84464/54464/23293/92345/55135/80119/545/472/54552/10111/80169/908/3178/7014/10728/23381/80351/3183/7203/10576/167227/3326/7520/64858/5073/6117/3181/2072/1736/25913/22948/55226/5981/170506/3192/9887/3320/9212/4751/142
GO_MICROTUBULE_MOTOR_ACTIVITY	GO_MICROTUBULE_MOTOR_ACTIVITY	83	-0.533896	-1.75835	0.000133501	0.00311688	0.00259976	3396	tags=39%, list=19%, signal=32%	1783/79659/127602/23046/55605/9585/55582/347240/11127/3799/9493/10513/23095/8701/3796/1062/9126/63971/51626/11004/9928/9371/3797/56992/81930/24137/3833/140735/146909/547/3832/10112
GO_METAPHASE_PLATE_CONGRESSION	GO_METAPHASE_PLATE_CONGRESSION	56	-0.592342	-1.83048	0.000139181	0.00321599	0.00268242	2143	tags=36%, list=12%, signal=32%	81929/79003/23636/150465/1062/8697/81610/55143/152185/11004/3837/3192/9928/81930/3833/81620/10403/83540/1063/10615
GO_REGULATION_OF_TELOMERE_MAINTENANCE	GO_REGULATION_OF_TELOMERE_MAINTENANCE	78	-0.550876	-1.79256	0.000142761	0.00328742	0.00274201	5399	tags=65%, list=30%, signal=46%	8550/5570/65057/7515/8658/4216/1499/79618/5609/6714/84464/54464/23293/92345/80119/545/5514/472/54552/10111/80169/3184/908/4683/23049/3178/7014/23381/80351/3183/7203/10576/167227/55869/7874/7520/56252/5073/3181/2072/1736/25913/22948/55226/546/170506/3192/9887/9212/4751/142
GO_CHROMATIN_REMODELING_AT_CENTROMERE	GO_CHROMATIN_REMODELING_AT_CENTROMERE	29	-0.68721	-1.88177	0.000143474	0.00329256	0.00274629	3011	tags=62%, list=16%, signal=52%	64105/64946/55839/55320/91687/5928/8467/55355/5931/51773/79172/1058/2491/3070/79682/387103/201161/4678
GO_PLASMA_MEMBRANE_BOUNDED_CELL_PROJECTION_CYTOPLASM	GO_PLASMA_MEMBRANE_BOUNDED_CELL_PROJECTION_CYTOPLASM	193	-0.437687	-1.58676	0.00014465	0.00330635	0.00275779	5418	tags=38%, list=30%, signal=27%	4133/23710/84100/83544/5048/9474/6792/667/89876/25876/66008/79882/55130/55081/10564/821/22863/6787/120892/23322/9026/85478/55212/55717/1641/4137/84062/55626/6421/30849/5573/79659/282991/5566/7014/167691/26146/7802/231/11127/79971/3799/57539/26090/6416/22920/26985/10947/23095/8701/6683/26160/4976/51626/255758/2332/150737/7289/22832/127933/92104/55329/3192/9371/63915/3091/24137/126731/66000/2319/54…
GO_HISTONE_UBIQUITINATION	GO_HISTONE_UBIQUITINATION	45	-0.617067	-1.83261	0.000147453	0.00334272	0.00278813	2844	tags=53%, list=16%, signal=45%	6015/23028/84678/7319/9810/23304/8450/79577/7703/9646/56970/9025/55100/84108/9320/51322/1911/10075/6045/23326/165918/4591/29128/23512
GO_CENTRIOLE_ASSEMBLY	GO_CENTRIOLE_ASSEMBLY	38	-0.651598	-1.8727	0.000148407	0.00334272	0.00278813	2750	tags=47%, list=15%, signal=40%	163786/9662/79959/56890/7840/85459/23636/1069/10769/9851/26005/9738/152185/10733/6491/672/4591/1017
GO_MEMBRANE_DOCKING	GO_MEMBRANE_DOCKING	178	-0.444356	-1.60047	0.000148496	0.00334272	0.00278813	4652	tags=47%, list=25%, signal=36%	22863/1781/55835/80184/983/93323/11149/10121/54930/23322/91147/10890/23256/55722/85302/54806/84902/4905/376267/4867/26123/60412/5347/132320/83850/1453/95681/79600/5566/9217/347240/9662/7532/6809/10640/11311/79959/121441/23344/10142/7840/7846/6093/11064/1080/7531/79598/54903/22919/10228/115106/9657/54536/1069/9751/54801/55014/23354/7283/22994/7412/26005/10497/117177/118987/9738/23332/22832/10733/1…
GO_REGULATION_OF_NUCLEAR_DIVISION	GO_REGULATION_OF_NUCLEAR_DIVISION	182	-0.444046	-1.6023	0.000148643	0.00334272	0.00278813	4163	tags=44%, list=23%, signal=34%	51203/64793/8621/4041/10459/3834/56984/51451/4779/3643/472/9232/23137/54908/5573/10361/23363/5347/23113/891/113130/10419/10460/811/5902/54443/9585/25836/11065/6790/324/7756/79884/701/9820/137886/9319/1908/5810/64682/79598/996/23236/23636/1062/1027/8697/9126/348654/8555/4085/55023/9700/991/10735/546/1111/995/3192/3481/9787/4288/81620/126731/10403/26271/10040/8243/9735/7175/9212/3832/699/1028/655/7…
GO_REGULATION_OF_DNA_RECOMBINATION	GO_REGULATION_OF_DNA_RECOMBINATION	82	-0.537132	-1.76419	0.000156517	0.00349641	0.00291632	4632	tags=51%, list=25%, signal=38%	4437/118460/5788/2187/151987/10459/10097/55135/2068/29072/10111/55137/7014/55010/23028/55183/3575/10721/2521/10189/9400/9466/158880/7037/56916/641/22976/9984/23347/6830/1111/63979/64110/4436/3838/79915/56893/2956/142/8914/10635/116028
GO_NUCLEAR_MATRIX	GO_NUCLEAR_MATRIX	107	-0.504116	-1.72275	0.00015743	0.00350506	0.00292353	1871	tags=28%, list=10%, signal=25%	1822/22828/56916/641/3181/64395/22976/8507/22880/790/7919/9126/55660/9984/4841/10735/10238/8089/3192/9360/24137/29128/4602/8243/1788/387103/25909/4001/6732/1063
GO_RNA_INTERFERENCE	GO_RNA_INTERFERENCE	16	-0.789169	-1.90347	0.000158745	0.00350506	0.00292353	2542	tags=62%, list=14%, signal=54%	23405/7247/8575/29102/7257/10658/113802/1660/57510/103
GO_ACETYLTRANSFERASE_ACTIVITY	GO_ACETYLTRANSFERASE_ACTIVITY	110	-0.486949	-1.66451	0.000163397	0.00359045	0.00299476	4817	tags=51%, list=26%, signal=38%	8850/8877/8888/138050/26122/54934/1737/80018/64769/64921/10/3054/2033/675/79829/26151/9575/6877/157570/55683/80314/8202/8520/10449/8473/8648/23464/51616/10847/80218/27097/23522/114799/55274/1386/151050/9913/80155/51230/39/284058/57106/60560/2194/6605/1387/6871/8443/51773/7994/6872/11143/55226/117143/23326/79969
GO_REGULATION_OF_MRNA_METABOLIC_PROCESS	GO_REGULATION_OF_MRNA_METABOLIC_PROCESS	318	-0.403954	-1.53864	0.000166983	0.00365731	0.00305052	5219	tags=46%, list=29%, signal=34%	29896/56254/4154/5693/10179/23210/8241/4869/27161/5710/79068/5687/79882/91746/9589/6428/494115/3312/143471/10657/253943/118460/5691/7314/7936/10213/26058/55544/79048/83759/4691/10772/56829/51594/57721/54464/4670/10236/23435/54623/11051/3842/8125/5716/6431/64783/10659/5707/1981/6434/3190/23112/5704/23367/8106/140890/79869/9337/55095/10262/9967/4928/10914/3184/79675/891/4686/6829/580/27327/9588/876…
GO_PURINE_NUCLEOBASE_METABOLIC_PROCESS	GO_PURINE_NUCLEOBASE_METABOLIC_PROCESS	21	-0.744824	-1.90907	0.000173118	0.00377936	0.00315233	2659	tags=48%, list=15%, signal=41%	23028/5631/3251/10606/4522/5471/8833/2766/6470/7498
GO_N_ACYLTRANSFERASE_ACTIVITY	GO_N_ACYLTRANSFERASE_ACTIVITY	105	-0.50892	-1.73244	0.00017383	0.00378264	0.00315506	4473	tags=47%, list=24%, signal=35%	138050/26122/29956/54934/80018/64769/10/3054/2033/675/79829/26151/9575/6877/157570/55683/80314/9397/8202/8520/8473/8648/51616/10847/80218/27097/23522/114799/55274/1386/151050/9913/80155/51230/284058/57106/60560/6605/1387/6871/51773/7994/6872/11143/55226/117143/23326/79969/253782
GO_DNA_DEPENDENT_DNA_REPLICATION_MAINTENANCE_OF_FIDELITY	GO_DNA_DEPENDENT_DNA_REPLICATION_MAINTENANCE_OF_FIDELITY	38	-0.648663	-1.86426	0.000174406	0.00378292	0.0031553	4791	tags=76%, list=26%, signal=56%	50485/4437/4796/25939/6419/57697/675/54962/201973/259282/10189/91607/5424/641/348654/5426/9984/29980/254394/91603/146956/253714/1663/546/1763/55159/5111/64710/8914
GO_CENTROSOME_DUPLICATION	GO_CENTROSOME_DUPLICATION	65	-0.568705	-1.79111	0.000184005	0.00394028	0.00328655	2750	tags=43%, list=15%, signal=37%	163786/9662/84446/79959/23032/56890/9475/7840/85459/23636/1069/10769/7514/22994/9851/26005/348654/9738/152185/10733/6491/672/54820/55125/4591/899/9793/1017
GO_REGULATION_OF_DNA_DEPENDENT_DNA_REPLICATION	GO_REGULATION_OF_DNA_DEPENDENT_DNA_REPLICATION	47	-0.618215	-1.84451	0.000194935	0.00414792	0.00345974	3402	tags=72%, list=19%, signal=59%	50485/58525/4437/144455/63922/675/54962/90381/5985/5983/4683/7014/56897/79733/80174/79075/10926/91607/10269/11200/641/51053/5982/29980/91603/59343/546/8317/81620/26271/1017/3980/5984/8914
GO_TELOMERE_MAINTENANCE_VIA_SEMI_CONSERVATIVE_REPLICATION	GO_TELOMERE_MAINTENANCE_VIA_SEMI_CONSERVATIVE_REPLICATION	27	-0.694607	-1.87366	0.000198623	0.00421307	0.00351408	3191	tags=67%, list=17%, signal=55%	5985/5983/5422/7014/5424/6119/6117/5558/5427/5426/5982/10714/5981/2237/5557/1763/5984/5111
GO_ATPASE_COMPLEX	GO_ATPASE_COMPLEX	80	-0.538234	-1.75619	0.000219987	0.00463697	0.00386765	3680	tags=49%, list=20%, signal=39%	6595/57492/27443/4798/57634/1108/55249/1107/55929/10847/55193/10902/55274/6602/5928/8289/57504/8467/10042/6603/6605/5931/51773/1457/5981/6601/6599/8295/57459/6597/11177/86/6594/81611/5984/2186/79915/23512/3066
GO_DNA_PACKAGING_COMPLEX	GO_DNA_PACKAGING_COMPLEX	25	-0.715332	-1.9003	0.000236286	0.0049495	0.00412833	2993	tags=52%, list=16%, signal=44%	23310/84656/23522/10592/6654/7994/10051/1058/9918/64151/54892/23397/221656
GO_HETEROCHROMATIN	GO_HETEROCHROMATIN	71	-0.54886	-1.76093	0.000239027	0.00497591	0.00415036	3434	tags=49%, list=19%, signal=40%	23076/3159/157570/3619/79968/23310/6015/4999/10320/7319/7341/1656/9810/7703/7155/56916/1029/22880/10155/11335/146956/546/1058/57673/6045/23468/9031/1786/29128/3070/1788/10951/23512/2296/84733
GO_CHROMATIN_DNA_BINDING	GO_CHROMATIN_DNA_BINDING	89	-0.505087	-1.67282	0.00024178	0.00501767	0.00418519	3472	tags=36%, list=19%, signal=29%	23135/9575/1108/55818/55206/57822/3183/7403/6774/328/5928/6603/6605/10664/6601/6599/1660/51780/5927/57459/3192/79366/6597/2309/86/5469/2146/9324/29841/23512/7552/3066
GO_HISTONE_H3_K9_MODIFICATION	GO_HISTONE_H3_K9_MODIFICATION	49	-0.586437	-1.765	0.000276127	0.00562629	0.00469283	4817	tags=61%, list=26%, signal=45%	8850/5079/6839/80854/4204/10782/79813/26036/55011/23411/2122/4297/55818/23028/57343/55183/55209/51742/55870/546/57673/672/1111/9869/79723/10919/1786/4602/3720/1789
GO_RNA_DEPENDENT_DNA_BIOSYNTHETIC_PROCESS	GO_RNA_DEPENDENT_DNA_BIOSYNTHETIC_PROCESS	68	-0.552583	-1.76176	0.000284846	0.00573829	0.00478625	5399	tags=66%, list=30%, signal=47%	8550/5570/65057/8658/4216/54433/5478/1499/79618/5609/6714/54464/23293/92345/55135/80119/545/472/54552/10111/80169/908/3178/7014/10728/23381/80351/3183/7203/10576/167227/3326/7520/5073/6117/1736/25913/22948/55226/5981/3192/9887/3320/9212/4751
GO_TRANSFERASE_ACTIVITY_TRANSFERRING_ACYL_GROUPS	GO_TRANSFERASE_ACTIVITY_TRANSFERRING_ACYL_GROUPS	250	-0.404182	-1.51034	0.000285037	0.00573829	0.00478625	4841	tags=42%, list=26%, signal=31%	79683/254887/1376/8850/10162/8877/8888/3032/2752/79993/138050/26122/55304/29956/54934/1737/80018/56895/64769/341392/154141/64921/10/55326/3054/2033/675/79829/54503/26151/9575/6877/55301/157570/84649/3157/55683/80314/9397/79844/80339/124975/8202/58508/8520/10449/51601/54814/8473/8648/2678/23464/51616/55146/1431/10847/80218/55733/27097/23522/54898/114799/55274/1386/57678/253558/151050/64429/51114/9…
GO_SMOOTHENED_SIGNALING_PATHWAY	GO_SMOOTHENED_SIGNALING_PATHWAY	134	-0.463525	-1.6156	0.000286808	0.00575672	0.00480162	5500	tags=54%, list=30%, signal=38%	7048/916/5992/84100/22856/2255/50937/3340/2121/57545/5082/55081/80210/2263/57560/55835/51684/23322/374654/79583/55212/55717/8945/5080/403/26123/5567/221322/51174/5727/55764/92344/79659/51098/9786/80199/5167/79600/5566/8445/1495/26146/83871/7545/6422/27152/79809/28996/55733/84976/139411/57728/22873/54903/79989/91653/1387/26005/26160/9231/204851/7289/27148/6491/28981/79867/3169/23432/222663/2719/22…
GO_SINGLE_STRANDED_RNA_BINDING	GO_SINGLE_STRANDED_RNA_BINDING	81	-0.529575	-1.7338	0.000289775	0.00578174	0.0048225	5589	tags=57%, list=31%, signal=40%	192670/129563/284131/10445/10179/23210/26065/23586/27161/57332/6631/6827/79882/10657/6310/9987/1654/113251/3185/9775/8761/6741/3178/3183/55342/5433/132430/3187/11338/26523/55601/7072/51663/27316/87178/2332/10492/1663/80336/1660/3609/8087/3192/124540/219988/4440
GO_POSITIVE_REGULATION_OF_GENE_EXPRESSION_EPIGENETIC	GO_POSITIVE_REGULATION_OF_GENE_EXPRESSION_EPIGENETIC	51	-0.586287	-1.77916	0.000298483	0.00592036	0.00493811	3787	tags=53%, list=21%, signal=42%	2033/57492/10514/3159/57178/221830/83637/9188/5253/6602/80312/25885/5437/8289/8467/23451/54454/9014/9015/25842/11240/29028/80336/1111/84172/9031/7913
GO_KINETOCHORE_ORGANIZATION	GO_KINETOCHORE_ORGANIZATION	19	-0.743258	-1.87207	0.000327179	0.00643261	0.00536538	3011	tags=89%, list=16%, signal=75%	51112/80152/26054/64105/64946/55839/79003/10592/1062/10051/1058/23126/81620/10403/387103/83540/1063
GO_REGULATION_OF_SIGNAL_TRANSDUCTION_BY_P53_CLASS_MEDIATOR	GO_REGULATION_OF_SIGNAL_TRANSDUCTION_BY_P53_CLASS_MEDIATOR	174	-0.446254	-1.60223	0.000329812	0.00646547	0.00539279	4167	tags=48%, list=23%, signal=38%	9219/1460/64769/1459/83596/23411/2033/6878/5716/94241/545/6875/3190/472/6877/8851/9521/10111/1108/5985/5983/580/4683/6873/10419/84154/1107/8445/4839/6749/23028/4193/51616/91875/55170/54700/28996/1432/6790/83860/29117/5810/10269/5928/1655/5563/4194/51230/11200/641/6119/6117/6882/5931/11198/7994/6872/5982/1457/960/11073/8148/117584/204851/8805/672/1111/7159/80010/10919/1763/7156/55003/83695/1017/92…
GO_TRANSCRIPTION_COACTIVATOR_ACTIVITY	GO_TRANSCRIPTION_COACTIVATOR_ACTIVITY	317	-0.384917	-1.46615	0.000335139	0.00653181	0.00544812	5259	tags=43%, list=29%, signal=31%	6257/2874/10370/7021/56254/84441/9792/23210/4869/79960/7337/1499/9519/5579/8850/55809/6874/8031/9440/10498/22954/26205/6666/6879/85441/26039/9112/51741/6760/5465/9219/11243/88/171023/3054/2033/11319/8085/25/2957/644353/6595/57492/4520/23076/25937/3159/57178/4778/1616/23082/9967/4928/10413/51147/8202/58508/119392/9975/83637/8648/23028/51442/10847/898/10463/28996/9282/27097/4863/5253/29117/6602/252…
GO_REGULATION_OF_POSTTRANSCRIPTIONAL_GENE_SILENCING	GO_REGULATION_OF_POSTTRANSCRIPTIONAL_GENE_SILENCING	83	-0.515786	-1.6987	0.000358491	0.00686751	0.00572812	2171	tags=40%, list=12%, signal=35%	6774/81929/55706/10269/26523/5437/1994/1655/23636/79902/57122/5430/348995/23165/5903/100101267/2332/5431/9611/9883/23369/1660/4613/8087/55746/57510/103/23279/10526/9631/7175/23225/9972
GO_HISTONE_H3_K9_METHYLATION	GO_HISTONE_H3_K9_METHYLATION	38	-0.634238	-1.8228	0.000363638	0.00690707	0.00576112	4803	tags=68%, list=26%, signal=51%	5079/6839/80854/4204/10782/79813/55011/23411/2122/55818/23028/57343/55183/55209/51742/55870/546/57673/672/9869/79723/10919/1786/4602/3720/1789
GO_RIBONUCLEOPROTEIN_GRANULE	GO_RIBONUCLEOPROTEIN_GRANULE	221	-0.41294	-1.5169	0.000367128	0.00695372	0.00580002	4006	tags=37%, list=22%, signal=29%	1654/54464/10146/4137/23435/9627/85363/113251/3190/23112/23367/9575/6629/26019/9337/10456/55095/7073/55629/9924/580/27327/57521/8761/149041/4848/11273/64848/5433/7341/1656/132430/22794/27097/167227/6780/54888/22868/9475/23589/3191/23019/7846/220988/4343/6093/8570/10970/26523/1994/23644/5563/196513/2886/57690/113802/5395/7072/56288/7150/84206/9513/57819/2332/9931/80336/23369/9908/1660/127933/57532…
GO_NCRNA_EXPORT_FROM_NUCLEUS	GO_NCRNA_EXPORT_FROM_NUCLEUS	36	-0.638007	-1.81806	0.000372752	0.0070404	0.00587233	3102	tags=83%, list=17%, signal=69%	8480/51808/129401/7248/9688/5901/4869/23511/4927/53371/4928/6741/11260/81929/22916/55706/23636/79902/57122/348995/23165/5903/100101267/9883/55746/23279/9631/7175/23225/9972
GO_SPINDLE_MIDZONE	GO_SPINDLE_MIDZONE	34	-0.661077	-1.86374	0.000376221	0.00708602	0.00591037	3199	tags=59%, list=17%, signal=49%	5347/55920/9585/55183/6790/79884/22919/9094/1062/8502/29127/55143/3192/9928/81930/54627/146909/9212/201161/990
GO_NEURAL_TUBE_DEVELOPMENT	GO_NEURAL_TUBE_DEVELOPMENT	159	-0.445494	-1.59152	0.000379733	0.0071322	0.00594889	3842	tags=42%, list=21%, signal=33%	11146/5080/55626/25/10427/8321/10512/2535/5567/221322/5727/55764/29072/92344/51098/140467/80199/836/79600/5566/9585/26146/57822/84678/1856/6422/27152/7403/317/2909/7189/57728/54903/8289/8543/7976/26005/26160/54910/5754/57619/8642/4036/23648/7289/6768/6491/1857/7042/57534/4522/9968/55746/3169/3091/23432/2348/4040/655/4763/6659/8463/6297/6608/57216/6664
GO_MEIOSIS_I_CELL_CYCLE_PROCESS	GO_MEIOSIS_I_CELL_CYCLE_PROCESS	108	-0.490439	-1.67148	0.000390434	0.00727225	0.00606571	4493	tags=42%, list=25%, signal=32%	1761/25788/7314/84464/3622/27030/256126/57697/675/472/6847/9232/10111/11144/5347/7917/116138/4439/2177/5892/898/6790/57820/23304/10734/9319/55706/7155/1164/5889/2072/146956/993/9700/29893/8438/995/80010/9134/26271/83990/10388/84057/2956/7153
GO_REGULATION_OF_CHROMOSOME_SEPARATION	GO_REGULATION_OF_CHROMOSOME_SEPARATION	61	-0.565809	-1.78321	0.000390434	0.00727225	0.00606571	4067	tags=54%, list=22%, signal=42%	1459/10459/56984/51451/472/9232/54908/5347/891/10460/324/7756/701/9319/64682/996/1062/8697/348654/1457/4085/9700/991/9787/81620/10403/26271/7175/9212/699/7272/1063/990
GO_CILIARY_PLASM	GO_CILIARY_PLASM	110	-0.475106	-1.62403	0.000405329	0.00752882	0.00627971	5324	tags=34%, list=29%, signal=24%	84100/83544/9474/89876/25876/55130/55081/10564/22863/6787/23322/85478/55212/55717/1641/55626/30849/5573/79659/5566/167691/26146/7802/57539/22920/8701/26160/51626/255758/150737/7289/22832/92104/55329/126731/1063/10382
GO_POLY_PYRIMIDINE_TRACT_BINDING	GO_POLY_PYRIMIDINE_TRACT_BINDING	26	-0.700392	-1.87802	0.000419681	0.0077102	0.006431	2945	tags=50%, list=16%, signal=42%	8761/6741/3183/132430/3187/11338/87178/2332/80336/3192/124540/219988/4440
GO_CHROMOSOME_ORGANIZATION_INVOLVED_IN_MEIOTIC_CELL_CYCLE	GO_CHROMOSOME_ORGANIZATION_INVOLVED_IN_MEIOTIC_CELL_CYCLE	59	-0.557967	-1.74945	0.00043954	0.00800939	0.00668055	3952	tags=42%, list=22%, signal=33%	27030/256126/472/6847/10111/11144/7917/23310/2177/898/57820/701/10734/9319/55706/10592/5889/10051/546/9918/9134/83990/699/10388/23397
GO_NUCLEAR_HETEROCHROMATIN	GO_NUCLEAR_HETEROCHROMATIN	30	-0.66888	-1.84511	0.000460624	0.00828138	0.00690742	3939	tags=67%, list=22%, signal=52%	115426/23411/157570/23310/6015/10320/7703/10155/11335/146956/546/1058/57673/6045/23468/29128/1788/10951/23512/2296
GO_MCM_COMPLEX	GO_MCM_COMPLEX	12	-0.8288	-1.87275	0.00046287	0.00829957	0.00692258	1668	tags=75%, list=9%, signal=68%	79892/4176/254394/4173/253714/84515/4172/4171/4175
GO_GERM_CELL_DEVELOPMENT	GO_GERM_CELL_DEVELOPMENT	237	-0.406225	-1.50842	0.000479191	0.00854663	0.00712866	3820	tags=27%, list=21%, signal=22%	25809/581/583/8085/51465/675/6595/3267/85315/55779/6875/472/6847/80025/8382/10361/9444/90780/11144/2189/7073/6198/891/55818/5566/64848/26108/346673/55342/201164/1730/6790/57820/11218/54888/2475/84223/9319/9025/1080/22873/79989/10658/27125/4090/1672/2176/91603/80336/6045/2119/4880/51361/163589/9425/26256/26271/259266/4436/4192/83990/3148/6732/3815/23198
GO_PROTEIN_LOCALIZATION_TO_MICROTUBULE_ORGANIZING_CENTER	GO_PROTEIN_LOCALIZATION_TO_MICROTUBULE_ORGANIZING_CENTER	32	-0.653317	-1.83076	0.000484678	0.00859888	0.00717224	3955	tags=62%, list=22%, signal=49%	55722/2804/64770/50855/27185/2932/1453/636/6790/324/121441/137886/23636/22994/9851/26005/6491/11190/55125/10615
GO_DOUBLE_STRANDED_RNA_BINDING	GO_DOUBLE_STRANDED_RNA_BINDING	74	-0.528325	-1.70101	0.000488441	0.00864283	0.0072089	2879	tags=41%, list=16%, signal=34%	149041/3608/9188/23405/55342/1213/8575/3329/4939/10376/6780/29102/8638/3326/26523/55601/1994/7037/4940/27067/51663/2332/1660/56919/3609/170506/8087/3192/103/5610
GO_SITE_OF_DNA_DAMAGE	GO_SITE_OF_DNA_DAMAGE	67	-0.539865	-1.71248	0.000507666	0.00891546	0.00743629	5010	tags=58%, list=27%, signal=42%	56852/92797/50485/10092/25939/6419/221443/10459/10097/55135/23137/157570/8065/10111/79968/4683/254225/5429/55183/51444/1386/9025/7520/91607/55100/56916/6119/6117/11335/23347/79677/23468/165918/55159/10951/56893/5932/142/8914
GO_METHIONINE_METABOLIC_PROCESS	GO_METHIONINE_METABOLIC_PROCESS	16	-0.759217	-1.83123	0.000507826	0.00891546	0.00743629	1787	tags=44%, list=10%, signal=40%	4552/4143/4548/51074/4522/23743/55256
GO_STRUCTURAL_CONSTITUENT_OF_NUCLEAR_PORE	GO_STRUCTURAL_CONSTITUENT_OF_NUCLEAR_PORE	26	-0.694574	-1.86242	0.000515216	0.00899821	0.00750532	3132	tags=73%, list=17%, signal=61%	23511/4927/53371/10204/4928/65109/55706/23636/79902/57122/54830/23165/100101267/9883/55746/23279/9631/7175/9972
GO_HOMOLOGOUS_RECOMBINATION	GO_HOMOLOGOUS_RECOMBINATION	49	-0.574712	-1.72971	0.000522901	0.00910877	0.00759754	4632	tags=51%, list=25%, signal=38%	4437/25788/84464/27030/57697/472/6847/10111/11144/116138/4439/5892/57820/23304/9319/7155/5889/2072/146956/29893/8438/80010/83990/84057/7153
GO_RAN_GTPASE_BINDING	GO_RAN_GTPASE_BINDING	38	-0.626414	-1.80032	0.000540539	0.00936749	0.00781333	3132	tags=47%, list=17%, signal=39%	9670/3842/10204/5902/23214/11260/30000/23039/1434/7514/5903/10527/3837/10048/57510/55705/332/10526
GO_METAPHASE_ANAPHASE_TRANSITION_OF_CELL_CYCLE	GO_METAPHASE_ANAPHASE_TRANSITION_OF_CELL_CYCLE	56	-0.56703	-1.75226	0.000548769	0.00948566	0.00791189	3936	tags=54%, list=22%, signal=42%	10459/56984/51451/472/54908/5347/891/10460/324/7756/701/9319/64682/996/1062/8697/348654/4085/9700/991/9787/81620/10403/26271/7175/9212/699/7272/1063/990
GO_POSITIVE_REGULATION_OF_HISTONE_METHYLATION	GO_POSITIVE_REGULATION_OF_HISTONE_METHYLATION	40	-0.611136	-1.77682	0.000573299	0.00985898	0.00822327	4452	tags=55%, list=24%, signal=42%	4204/7936/26147/54623/23411/55904/4297/94104/8473/57343/23476/22823/55183/26053/9646/80312/22976/672/1786/4602/3720/1789
GO_REGULATION_OF_DOUBLE_STRAND_BREAK_REPAIR	GO_REGULATION_OF_DOUBLE_STRAND_BREAK_REPAIR	65	-0.544641	-1.71532	0.000576926	0.00989604	0.00825419	4407	tags=51%, list=24%, signal=39%	6419/84309/2187/151987/10459/10097/55135/29072/55137/55010/254225/23028/55183/10721/2521/9400/158880/55100/9320/23347/1663/1111/56907/5591/63979/64110/56893/2305/142/7913/8914/10635/116028
GO_MITOTIC_DNA_INTEGRITY_CHECKPOINT	GO_MITOTIC_DNA_INTEGRITY_CHECKPOINT	101	-0.497814	-1.68061	0.0006031	0.0103187	0.00860672	4622	tags=58%, list=25%, signal=44%	10498/4849/57472/983/6419/1112/144455/26058/4850/581/2033/3276/60561/5514/472/54962/90381/9337/891/4683/4848/4303/84446/4193/55571/7832/79733/51512/6790/1386/23019/7155/4194/11200/10769/641/1027/29980/91603/146956/11073/7029/8883/1869/835/995/9656/5591/5325/63967/1017/4998/4436/57551/55159/6659/5111/990/7153
GO_NON_RECOMBINATIONAL_REPAIR	GO_NON_RECOMBINATIONAL_REPAIR	70	-0.536785	-1.71791	0.000648302	0.0110359	0.00920494	5366	tags=59%, list=29%, signal=42%	8924/27339/7515/22992/151636/1161/7405/6419/84309/10213/84464/10459/55135/472/10111/5893/5422/580/4683/27343/7341/55183/51444/10721/5423/9025/7520/64858/158880/22976/2072/23347/672/165918/79184/9656/5591/3980/5932/9937/7913
GO_DNA_TEMPLATED_TRANSCRIPTION_ELONGATION	GO_DNA_TEMPLATED_TRANSCRIPTION_ELONGATION	106	-0.480426	-1.63864	0.000722391	0.0121437	0.0101289	3607	tags=42%, list=20%, signal=34%	4298/2068/29072/8861/221830/4686/6829/26610/905/6749/10771/55193/5433/2968/23476/79736/55677/4300/22916/79577/9646/10189/9400/9025/25885/5437/51497/22828/27336/23160/904/27125/5430/11198/7919/9014/9984/9015/5431/6830/51755/84172/3192/165918/2146
GO_REGULATION_OF_CENTROSOME_CYCLE	GO_REGULATION_OF_CENTROSOME_CYCLE	57	-0.556545	-1.72866	0.000765041	0.0128283	0.0106999	2427	tags=63%, list=13%, signal=55%	2648/57787/4869/153241/1499/8850/57132/55835/91147/64793/3834/4682/5902/79959/6790/79884/56890/9475/7840/85459/137886/23636/10769/7514/22994/348654/152185/10733/6491/11190/672/1111/4591/899/3832/4751
GO_INTRACILIARY_TRANSPORT	GO_INTRACILIARY_TRANSPORT	53	-0.570064	-1.74577	0.000795707	0.0132983	0.011092	4775	tags=58%, list=26%, signal=43%	55081/57560/8100/55112/11158/3842/403/22858/55764/79659/51098/167691/26146/11127/79809/117178/57539/22920/57728/79989/64792/22994/26160/51626/255758/150737/28981/92104/9371/3797/140735
GO_DORSAL_VENTRAL_NEURAL_TUBE_PATTERNING	GO_DORSAL_VENTRAL_NEURAL_TUBE_PATTERNING	24	-0.703552	-1.86795	0.000797029	0.0132983	0.011092	3423	tags=58%, list=19%, signal=47%	5567/221322/5727/55764/92344/79600/5566/26146/57728/54903/7289/3169/23432/6608
GO_KINESIN_COMPLEX	GO_KINESIN_COMPLEX	53	-0.56905	-1.74266	0.000808237	0.0134519	0.0112201	3136	tags=53%, list=17%, signal=44%	27185/23046/55605/9585/55582/347240/11127/3799/9493/22920/23095/7531/3796/1062/63971/11004/54820/9928/9371/3797/56992/81930/24137/3833/146909/547/3832/10112
GO_NON_MOTILE_CILIUM_ASSEMBLY	GO_NON_MOTILE_CILIUM_ASSEMBLY	51	-0.569391	-1.72789	0.000810653	0.0134588	0.0112259	4880	tags=55%, list=27%, signal=40%	57545/79738/55081/57560/8100/84314/55835/23322/55212/84902/583/221322/27185/55764/92344/79659/51098/80199/1453/9662/10640/27152/23300/54903/26005/26160/11190/57216
GO_ESC_E_Z_COMPLEX	GO_ESC_E_Z_COMPLEX	15	-0.765821	-1.83306	0.000816852	0.0135284	0.0112839	2414	tags=60%, list=13%, signal=52%	22823/121536/5928/5931/4591/2146/23512/3720/3066
GO_CYSTEINE_TYPE_PEPTIDASE_ACTIVITY	GO_CYSTEINE_TYPE_PEPTIDASE_ACTIVITY	175	-0.427876	-1.53653	0.000842866	0.0138568	0.0115578	2544	tags=23%, list=14%, signal=20%	115201/389856/6422/10713/90268/23358/23032/8078/8239/54764/9100/84132/7874/78990/158880/84669/27005/7398/8975/55031/84640/57646/9097/57695/205564/59343/29843/9700/260434/835/9736/23326/839/79184/642/159195/51029/25862/92291/827/7345
GO_DYNEIN_COMPLEX_BINDING	GO_DYNEIN_COMPLEX_BINDING	19	-0.725863	-1.82826	0.000859455	0.0140951	0.0117566	2514	tags=47%, list=14%, signal=41%	23300/636/324/9126/2332/4744/8934/7175/1063
GO_PROTEIN_TRANSPORT_ALONG_MICROTUBULE	GO_PROTEIN_TRANSPORT_ALONG_MICROTUBULE	68	-0.534494	-1.70408	0.000864556	0.0141099	0.0117689	3948	tags=49%, list=22%, signal=38%	11158/3842/57662/6421/403/22858/55764/79659/51098/7014/167691/26146/11127/79809/117178/3799/57539/22920/57728/79989/64792/22994/26160/51626/255758/150737/28981/92104/3192/9371/3797/140735/547
GO_NEGATIVE_REGULATION_OF_DNA_METABOLIC_PROCESS	GO_NEGATIVE_REGULATION_OF_DNA_METABOLIC_PROCESS	101	-0.492352	-1.66217	0.000872439	0.0141888	0.0118347	4632	tags=49%, list=25%, signal=36%	4437/6714/84309/2187/84464/54464/23293/10459/9104/201163/80119/472/54552/10111/80169/4297/4683/27000/3178/7014/55010/254225/7644/80351/3183/55183/659/167227/10721/9400/7520/9320/641/10155/2072/9984/25913/55226/23347/3192/81931/4880/64110/4436/56893/2956/3776/142/116028
GO_INTRACILIARY_TRANSPORT_INVOLVED_IN_CILIUM_ASSEMBLY	GO_INTRACILIARY_TRANSPORT_INVOLVED_IN_CILIUM_ASSEMBLY	40	-0.603562	-1.7548	0.000875721	0.0141888	0.0118347	4775	tags=62%, list=26%, signal=46%	55081/57560/8100/55112/3842/55764/79659/51098/26146/11127/79809/117178/57539/22920/57728/79989/64792/22994/26160/51626/150737/28981/9371/3797/140735
GO_PCG_PROTEIN_COMPLEX	GO_PCG_PROTEIN_COMPLEX	46	-0.579741	-1.72171	0.000875721	0.0141888	0.0118347	4212	tags=59%, list=23%, signal=45%	648/10336/1460/26147/1459/171023/23411/6015/10389/84678/22823/7703/121536/5928/84108/1911/9898/5931/55252/1457/6045/4591/2146/23512/3720/84733/3066
GO_ALTERNATIVE_MRNA_SPLICING_VIA_SPLICEOSOME	GO_ALTERNATIVE_MRNA_SPLICING_VIA_SPLICEOSOME	78	-0.518716	-1.68791	0.000895951	0.0144469	0.0120501	5974	tags=59%, list=33%, signal=40%	221662/9733/10921/5936/9939/79005/4154/10179/8241/9589/6428/10657/83759/10772/8621/4670/6431/6421/64783/10659/6434/140890/9967/51319/6426/3178/58517/23028/6432/4116/84991/3191/6427/5978/1655/10658/80004/27316/9513/55796/84081/2332/1660/8087/3192/135295
GO_REGULATION_OF_DENDRITE_DEVELOPMENT	GO_REGULATION_OF_DENDRITE_DEVELOPMENT	149	-0.435523	-1.53924	0.00090757	0.0145993	0.0121771	4346	tags=37%, list=24%, signal=28%	26039/54664/120892/7074/23373/5789/5530/115703/10097/50807/9693/27185/7804/8851/23363/26259/2932/6845/23043/1399/5911/5649/23271/10152/2475/9820/80823/1627/54413/10507/22941/65981/100132074/26037/10769/53335/4139/221935/80725/23613/4976/9231/2332/10059/1902/991/29993/170506/9762/4076/2146/55607/655/3066/5802
GO_NUCLEOBASE_BIOSYNTHETIC_PROCESS	GO_NUCLEOBASE_BIOSYNTHETIC_PROCESS	19	-0.7246	-1.82508	0.000917232	0.0147195	0.0122774	2272	tags=58%, list=12%, signal=51%	1503/2475/5631/3251/790/10606/4522/5471/56474/8833/6470
GO_U2_TYPE_SPLICEOSOMAL_COMPLEX	GO_U2_TYPE_SPLICEOSOMAL_COMPLEX	90	-0.4884	-1.61921	0.000928029	0.0147519	0.0123044	5322	tags=57%, list=29%, signal=40%	55692/9939/27339/9128/25804/6628/6631/55696/11157/84950/3550/5356/10291/79753/6936/6632/8449/54883/9775/10283/10594/84811/6629/1665/51645/10262/153527/55110/10946/57703/51747/22794/9343/51691/11338/23658/6635/988/27336/51362/23451/23524/51340/23020/55660/51634/57819/1659/10286/6638/23450
GO_CONDENSED_NUCLEAR_CHROMOSOME_CENTROMERIC_REGION	GO_CONDENSED_NUCLEAR_CHROMOSOME_CENTROMERIC_REGION	22	-0.6889	-1.78638	0.000963528	0.0151373	0.0126259	3199	tags=68%, list=17%, signal=56%	5347/891/64105/6790/55320/701/79003/79172/546/1058/79980/10403/9212/699/83540
GO_PEPTIDYL_THREONINE_MODIFICATION	GO_PEPTIDYL_THREONINE_MODIFICATION	117	-0.46718	-1.60845	0.000998929	0.0155842	0.0129986	4905	tags=44%, list=27%, signal=32%	5599/5579/9294/91/8877/983/57214/120892/63917/1460/1459/7443/2591/1981/5528/8851/5347/8408/22853/2932/805/57521/65267/5566/8445/28996/817/2475/9475/11113/6093/57452/2589/790/56288/2039/65125/9149/27347/6872/1457/219736/204851/1111/114805/51701/655/7272/199731/1950/388228
GO_SIGNAL_SEQUENCE_BINDING	GO_SIGNAL_SEQUENCE_BINDING	45	-0.580697	-1.7246	0.00103073	0.0160389	0.0133779	4497	tags=49%, list=25%, signal=37%	57214/5191/5830/26953/3842/5824/3840/6729/84134/4928/55176/30000/9221/9804/6730/100101267/9883/3841/3837/3838/163/9972
GO_MEIOTIC_CHROMOSOME_SEPARATION	GO_MEIOTIC_CHROMOSOME_SEPARATION	21	-0.697177	-1.78695	0.00103762	0.0160389	0.0133779	1852	tags=38%, list=10%, signal=34%	7155/2072/146956/9700/80010/7272/23397/7153
GO_NEGATIVE_REGULATION_OF_NUCLEAR_DIVISION	GO_NEGATIVE_REGULATION_OF_NUCLEAR_DIVISION	59	-0.541455	-1.69768	0.0011215	0.0171776	0.0143277	5217	tags=64%, list=29%, signal=46%	8658/9183/84101/84861/286151/27085/3550/1761/10459/3834/56984/51451/472/9232/54908/5573/5347/891/324/7756/701/9319/5810/348654/4085/991/546/1111/81620/10403/26271/10040/7175/9212/699/655/7272/1063
GO_SOMATIC_DIVERSIFICATION_OF_IMMUNE_RECEPTORS	GO_SOMATIC_DIVERSIFICATION_OF_IMMUNE_RECEPTORS	66	-0.522825	-1.65212	0.00117937	0.0179414	0.0149647	2404	tags=36%, list=13%, signal=32%	4683/27343/55183/3329/10721/5423/9025/9466/7037/6929/7374/22976/5395/23075/9984/6830/103/165918/5591/4436/79915/3148/2956/9156
GO_ATTACHMENT_OF_MITOTIC_SPINDLE_MICROTUBULES_TO_KINETOCHORE	GO_ATTACHMENT_OF_MITOTIC_SPINDLE_MICROTUBULES_TO_KINETOCHORE	13	-0.784405	-1.83792	0.00120065	0.0181829	0.0151661	2143	tags=62%, list=12%, signal=54%	81929/79003/1062/11004/3192/81620/10403/83540
GO_DNA_BINDING_BENDING	GO_DNA_BINDING_BENDING	20	-0.708604	-1.79951	0.00121605	0.0183747	0.0153261	209	tags=25%, list=1%, signal=25%	3148/2296/3149/7153/2299
GO_REGULATION_OF_RESPONSE_TO_DNA_DAMAGE_STIMULUS	GO_REGULATION_OF_RESPONSE_TO_DNA_DAMAGE_STIMULUS	195	-0.410878	-1.48948	0.00122287	0.0184363	0.0153775	3963	tags=44%, list=22%, signal=35%	6787/6419/84309/2187/126549/3622/151987/83596/10459/4137/23411/10097/55135/25/60561/1956/5716/545/5514/1054/3190/472/29072/9521/8505/5893/55137/79968/23049/7014/55010/56897/254225/23028/4193/51616/23201/5429/55183/10721/2521/9400/9025/1191/10269/158880/55100/9320/1655/11200/7398/22976/10155/2072/55031/7919/220042/9513/9984/9774/960/2332/23347/1663/1660/672/1111/8087/165918/79184/56907/5591/63979/…
GO_NUCLEOCYTOPLASMIC_CARRIER_ACTIVITY	GO_NUCLEOCYTOPLASMIC_CARRIER_ACTIVITY	29	-0.644598	-1.76508	0.00124663	0.018666	0.0155692	5695	tags=76%, list=31%, signal=52%	79711/56478/51194/3836/5901/64901/55374/26953/3842/3840/10204/23214/30000/23039/23534/1434/7514/3841/3837/57510/55705/3838
GO_NUCLEIC_ACID_PHOSPHODIESTER_BOND_HYDROLYSIS	GO_NUCLEIC_ACID_PHOSPHODIESTER_BOND_HYDROLYSIS	286	-0.382244	-1.44379	0.00124787	0.018666	0.0155692	4700	tags=38%, list=26%, signal=29%	81608/6036/88745/118460/57472/23283/2967/56941/90459/85441/25939/7314/6419/84309/126549/2071/53981/5168/642843/65095/54464/23293/10146/11051/581/23357/57697/51567/2068/283989/27443/79869/10111/5985/9337/5983/55629/9924/4686/836/80055/5167/112479/4848/128387/23405/7247/2968/317/201164/79042/116461/9131/167227/29102/8450/22916/23019/5393/10535/11052/51163/64789/4343/328/5810/2081/64858/26523/7257/5…
GO_CONDENSED_NUCLEAR_CHROMOSOME_KINETOCHORE	GO_CONDENSED_NUCLEAR_CHROMOSOME_KINETOCHORE	15	-0.754319	-1.80553	0.00125838	0.0187613	0.0156487	3199	tags=80%, list=17%, signal=66%	5347/891/64105/55320/701/79003/79172/1058/79980/10403/699/83540
GO_MITOTIC_DNA_REPLICATION_CHECKPOINT	GO_MITOTIC_DNA_REPLICATION_CHECKPOINT	10	-0.82514	-1.76125	0.00126982	0.0188845	0.0157514	1069	tags=60%, list=6%, signal=57%	91603/11073/8883/63967/4998/990
GO_5_3_EXONUCLEASE_ACTIVITY	GO_5_3_EXONUCLEASE_ACTIVITY	14	-0.765671	-1.81231	0.00127283	0.0188845	0.0157514	2268	tags=57%, list=12%, signal=50%	167227/64789/64858/2237/51692/22803/9937/9156
GO_ORGAN_OR_TISSUE_SPECIFIC_IMMUNE_RESPONSE	GO_ORGAN_OR_TISSUE_SPECIFIC_IMMUNE_RESPONSE	30	-0.644826	-1.77875	0.00132354	0.0194312	0.0162074	1245	tags=20%, list=7%, signal=19%	1672/9245/820/92747/5284/4057
GO_POSITIVE_REGULATION_OF_DNA_METABOLIC_PROCESS	GO_POSITIVE_REGULATION_OF_DNA_METABOLIC_PROCESS	179	-0.415826	-1.49809	0.00137865	0.0200767	0.0167458	5399	tags=52%, list=30%, signal=37%	8550/5570/65057/7515/2255/8658/7486/54929/79977/4216/151636/57332/25849/1499/23514/79618/1161/5609/7490/118460/6714/5788/4204/6419/2187/84464/63922/10459/92345/581/23411/10097/55135/1956/545/5514/1054/2068/472/10361/10111/5985/5983/3184/908/4683/3178/10728/80351/7203/23201/10576/55183/8239/3326/2521/79075/7874/9025/7520/7037/5073/3181/22976/10155/7919/1736/5982/25913/4931/22948/23347/1663/546/166…
GO_LYSINE_ACETYLATED_HISTONE_BINDING	GO_LYSINE_ACETYLATED_HISTONE_BINDING	19	-0.71642	-1.80447	0.00137945	0.0200767	0.0167458	4622	tags=79%, list=25%, signal=59%	10498/6046/11176/4297/23476/8019/4300/29117/23613/54454/6872/55023/8805/6597/23198
GO_SPERMATID_DIFFERENTIATION	GO_SPERMATID_DIFFERENTIATION	144	-0.438384	-1.54307	0.0013912	0.0202029	0.016851	4351	tags=31%, list=24%, signal=24%	84071/6407/3622/130026/25809/581/583/51465/4867/6595/3267/55779/6847/80025/8382/9444/90780/11144/2189/55818/5566/64848/26108/55342/1656/23139/201164/57820/54888/84223/9319/9025/1080/79989/27125/1672/51361/163589/9425/26256/83990/3148/6732/3815/23198
GO_NEGATIVE_REGULATION_OF_CHROMOSOME_SEGREGATION	GO_NEGATIVE_REGULATION_OF_CHROMOSOME_SEGREGATION	43	-0.608574	-1.79185	0.00149945	0.0215434	0.0179691	3936	tags=58%, list=22%, signal=46%	10459/56984/51451/472/9232/54908/5347/891/324/7756/701/9319/348654/4085/9700/991/546/81620/10403/26271/7175/9212/699/7272/1063
GO_GENETIC_IMPRINTING	GO_GENETIC_IMPRINTING	27	-0.644111	-1.73745	0.00153764	0.0219048	0.0182706	2028	tags=41%, list=11%, signal=36%	9646/84108/10155/10664/51742/672/3481/2778/1788/1028/221656
GO_SOMATIC_RECOMBINATION_OF_IMMUNOGLOBULIN_GENE_SEGMENTS	GO_SOMATIC_RECOMBINATION_OF_IMMUNOGLOBULIN_GENE_SEGMENTS	49	-0.549567	-1.65403	0.00154213	0.0219223	0.0182852	2404	tags=37%, list=13%, signal=32%	55183/3329/5423/9025/9466/7037/6929/7374/22976/23075/9984/6830/165918/5591/4436/79915/2956/9156
GO_REGULATION_OF_DOUBLE_STRAND_BREAK_REPAIR_VIA_HOMOLOGOUS_RECOMBINATION	GO_REGULATION_OF_DOUBLE_STRAND_BREAK_REPAIR_VIA_HOMOLOGOUS_RECOMBINATION	38	-0.606102	-1.74194	0.00154835	0.0219644	0.0183203	4363	tags=61%, list=24%, signal=46%	2187/151987/10459/10097/55135/29072/55137/55010/23028/55183/10721/2521/9400/158880/23347/1111/63979/64110/56893/142/8914/10635/116028
GO_RESPONSE_TO_ANTIMETABOLITE	GO_RESPONSE_TO_ANTIMETABOLITE	15	-0.748481	-1.79155	0.00155303	0.0219843	0.0183369	1984	tags=47%, list=11%, signal=42%	1244/641/11143/2332/1663/546/8914
GO_REGULATION_OF_CELLULAR_RESPONSE_TO_HEAT	GO_REGULATION_OF_CELLULAR_RESPONSE_TO_HEAT	76	-0.508355	-1.64744	0.00157409	0.022189	0.0185076	4801	tags=55%, list=26%, signal=41%	9529/3312/3304/23511/818/4927/4137/23411/2033/53371/2288/545/472/2932/4928/57521/27000/10728/817/2475/81929/3326/55706/7531/23636/79902/57122/6119/6117/348995/1387/23165/5903/100101267/9883/55746/23279/3320/9631/7175/23225/9972
GO_SEX_CHROMOSOME	GO_SEX_CHROMOSOME	25	-0.674191	-1.79101	0.00160523	0.0225806	0.0188343	3352	tags=60%, list=18%, signal=49%	23137/157570/6015/7319/7341/7703/23347/6599/10733/6045/79677/3192/1017/1788/23512
GO_POSITIVE_REGULATION_OF_CHROMOSOME_ORGANIZATION	GO_POSITIVE_REGULATION_OF_CHROMOSOME_ORGANIZATION	169	-0.417231	-1.49262	0.00164643	0.0230159	0.0191973	4452	tags=43%, list=24%, signal=33%	4204/7936/84464/120892/3622/26147/55011/92345/54623/23411/6421/545/5514/25942/472/23137/55904/10111/4297/94104/3184/221477/908/891/4683/3178/8473/23028/80351/57343/25836/7203/23476/22823/10576/55183/26053/84656/9810/29117/9646/80312/7520/5073/3181/22976/6871/22880/10155/1736/25913/11143/22948/2332/1663/9700/546/55729/672/170506/9869/2237/3192/9787/1786/81620/4602/7175/9212/4751/3720/1789
GO_REGULATION_OF_CHROMATIN_ORGANIZATION	GO_REGULATION_OF_CHROMATIN_ORGANIZATION	173	-0.417759	-1.49786	0.00166072	0.0231674	0.0193237	4485	tags=46%, list=25%, signal=35%	80854/23133/6879/4204/10782/7936/120892/3622/2624/26147/26036/55011/54623/23411/201163/54880/79829/25942/472/55904/3159/90780/4297/94104/64324/221477/891/55818/8473/23028/57343/25836/55170/23476/22823/55183/26053/817/84656/55677/9810/5253/29117/9646/80312/10269/55209/55100/9320/22976/6871/22880/10155/54454/10664/4302/11143/2332/25842/11240/6830/29028/11011/9874/546/55729/8318/672/1111/5927/9869/3…
GO_MITOTIC_G2_M_TRANSITION_CHECKPOINT	GO_MITOTIC_G2_M_TRANSITION_CHECKPOINT	26	-0.663052	-1.7779	0.00169534	0.0235041	0.0196045	3708	tags=69%, list=20%, signal=55%	983/1112/60561/472/90381/4683/4303/84446/641/29980/91603/11073/8883/672/63967/4998/57551/990
GO_REGULATION_OF_DENDRITIC_SPINE_DEVELOPMENT	GO_REGULATION_OF_DENDRITIC_SPINE_DEVELOPMENT	74	-0.502645	-1.61833	0.00172492	0.023816	0.0198646	3863	tags=42%, list=21%, signal=33%	115703/10097/50807/27185/7804/8851/5649/10152/2475/80823/1627/54413/22941/65981/100132074/26037/10769/221935/80725/23613/4976/9231/2332/10059/1902/170506/9762/4076/55607/3066/5802
GO_CHROMATIN_DISASSEMBLY	GO_CHROMATIN_DISASSEMBLY	19	-0.707168	-1.78117	0.00190159	0.0257874	0.021509	3326	tags=68%, list=18%, signal=56%	3159/4778/55193/6602/8289/6603/196528/6605/11198/11240/6601/6599/6597
GO_ESTABLISHMENT_OF_ORGANELLE_LOCALIZATION	GO_ESTABLISHMENT_OF_ORGANELLE_LOCALIZATION	392	-0.357994	-1.37707	0.00190222	0.0257874	0.021509	5365	tags=42%, list=29%, signal=30%	55781/10959/91272/84100/5048/128637/2255/1639/9183/9342/8452/5864/5901/4869/122553/153241/1499/4935/8615/4131/29058/66008/5294/8825/55153/8729/9871/4647/3965/57132/10972/117583/89958/84376/51112/7109/3993/7314/283489/10121/2157/120892/4927/9230/51203/3064/2624/23256/57584/55212/90411/5870/357/55717/10342/4137/55166/3834/84062/10097/5080/583/55773/4905/10427/3998/2241/9368/10484/9570/23122/472/604…
GO_CONDENSED_CHROMOSOME_OUTER_KINETOCHORE	GO_CONDENSED_CHROMOSOME_OUTER_KINETOCHORE	14	-0.756287	-1.7901	0.00192265	0.0259076	0.0216093	3337	tags=79%, list=18%, signal=64%	54908/5347/891/259282/701/221150/348235/55746/10403/699/1063
GO_CYCLIN_DEPENDENT_PROTEIN_SERINE_THREONINE_KINASE_REGULATOR_ACTIVITY	GO_CYCLIN_DEPENDENT_PROTEIN_SERINE_THREONINE_KINASE_REGULATOR_ACTIVITY	46	-0.556984	-1.65413	0.00194536	0.026109	0.0217772	3331	tags=48%, list=18%, signal=39%	8851/891/836/1019/151195/905/85417/898/388324/901/1164/904/1027/892/1029/54619/899/890/900/9134/1028/79616
GO_REGULATION_OF_CEREBELLAR_GRANULE_CELL_PRECURSOR_PROLIFERATION	GO_REGULATION_OF_CEREBELLAR_GRANULE_CELL_PRECURSOR_PROLIFERATION	10	-0.815762	-1.74123	0.00196698	0.0263465	0.0219754	140	tags=20%, list=1%, signal=20%	1950/6608
GO_DNA_SYNTHESIS_INVOLVED_IN_DNA_REPAIR	GO_DNA_SYNTHESIS_INVOLVED_IN_DNA_REPAIR	48	-0.564302	-1.69565	0.00197228	0.0263651	0.0219909	3936	tags=52%, list=22%, signal=41%	10459/23411/6847/201973/5985/5983/5422/56897/5429/51455/9100/5424/55666/6119/6117/83932/5427/5426/5982/5980/10714/5981/5984/5111/51514
GO_NEGATIVE_REGULATION_OF_CELL_CYCLE_G2_M_PHASE_TRANSITION	GO_NEGATIVE_REGULATION_OF_CELL_CYCLE_G2_M_PHASE_TRANSITION	95	-0.470714	-1.58055	0.0019884	0.0264753	0.0220827	3708	tags=37%, list=20%, signal=30%	60561/5716/5707/472/5704/90381/5347/4683/5706/4303/5713/84446/6790/5709/10197/5708/641/55031/8555/29980/91603/11073/5718/8883/672/1111/5717/79184/63967/4998/57551/9212/990/23198/51514
GO_HISTONE_H4_K16_ACETYLATION	GO_HISTONE_H4_K16_ACETYLATION	20	-0.695138	-1.76532	0.0019972	0.0264911	0.0220959	5267	tags=85%, list=29%, signal=61%	10445/9474/54934/55011/3054/23411/55167/4297/55683/8473/26053/151050/10269/51230/284058/672/339287
GO_NEGATIVE_REGULATION_OF_CELL_CYCLE_PHASE_TRANSITION	GO_NEGATIVE_REGULATION_OF_CELL_CYCLE_PHASE_TRANSITION	230	-0.398126	-1.46884	0.00199747	0.0264911	0.0220959	3819	tags=38%, list=21%, signal=31%	581/56984/2033/51451/3276/8737/60561/5716/5707/472/5704/90381/54908/5347/9337/891/1019/4683/5706/4848/4303/5713/84446/4193/55571/7832/79733/51512/6790/324/7756/7465/5709/10197/678/701/29117/5708/79577/23019/9319/91607/10385/4194/11200/10769/641/1027/1029/55031/348654/8555/4085/29980/91603/11073/5718/7029/8883/991/1869/672/1111/835/995/5717/79184/5591/5325/81620/63967/10403/26271/1017/4998/7175/21…
GO_ORGANELLE_TRANSPORT_ALONG_MICROTUBULE	GO_ORGANELLE_TRANSPORT_ALONG_MICROTUBULE	79	-0.485916	-1.58486	0.0020112	0.026589	0.0221777	4420	tags=44%, list=24%, signal=34%	7314/10121/3064/57584/5870/4137/84062/79443/282991/6845/11127/636/3799/9493/22920/26985/10125/10947/23095/10128/23224/6683/63971/4976/26958/54820/55288/4744/9371/63915/3797/3091/547/254263/7345
GO_METHYLATION_DEPENDENT_CHROMATIN_SILENCING	GO_METHYLATION_DEPENDENT_CHROMATIN_SILENCING	23	-0.675467	-1.76668	0.00201276	0.026589	0.0221777	2615	tags=39%, list=14%, signal=34%	57343/80312/22880/10155/55729/9869/1786/3070/1788
GO_HISTONE_H4_ACETYLATION	GO_HISTONE_H4_ACETYLATION	64	-0.516114	-1.62478	0.00204756	0.0268903	0.0224289	4095	tags=55%, list=22%, signal=43%	64769/55011/9643/3054/23411/55167/2033/675/79829/57634/4297/55683/80314/51147/8520/8473/8648/55929/80218/10902/26053/55677/151050/10269/51230/284058/9767/11143/57673/8295/672/8089/23326/339287/86
GO_NEGATIVE_REGULATION_OF_METAPHASE_ANAPHASE_TRANSITION_OF_CELL_CYCLE	GO_NEGATIVE_REGULATION_OF_METAPHASE_ANAPHASE_TRANSITION_OF_CELL_CYCLE	37	-0.605912	-1.73404	0.00206542	0.0270719	0.0225804	3936	tags=59%, list=22%, signal=47%	10459/56984/51451/472/54908/5347/891/324/7756/701/9319/348654/4085/991/81620/10403/26271/7175/9212/699/7272/1063
GO_DNA_TEMPLATED_TRANSCRIPTION_TERMINATION	GO_DNA_TEMPLATED_TRANSCRIPTION_TERMINATION	74	-0.498881	-1.60621	0.00207238	0.0271103	0.0226124	5914	tags=65%, list=32%, signal=44%	4150/5435/9533/57466/10849/79101/1022/8458/7270/7978/6628/8189/81608/23283/2967/55339/2071/134353/53981/7343/11051/2068/23064/8106/79869/1477/10914/221830/4686/10419/7884/2968/25888/22916/10269/25885/6635/5437/22828/5430/1479/9014/9015/1478/1660/84172/51692/22803
GO_SOMATIC_DIVERSIFICATION_OF_IMMUNE_RECEPTORS_VIA_GERMLINE_RECOMBINATION_WITHIN_A_SINGLE_LOCUS	GO_SOMATIC_DIVERSIFICATION_OF_IMMUNE_RECEPTORS_VIA_GERMLINE_RECOMBINATION_WITHIN_A_SINGLE_LOCUS	58	-0.534547	-1.66198	0.00214537	0.0278484	0.0232281	2404	tags=33%, list=13%, signal=29%	55183/3329/5423/9025/9466/7037/6929/7374/22976/23075/9984/6830/165918/5591/4436/79915/3148/2956/9156
GO_NUCLEAR_MEMBRANE	GO_NUCLEAR_MEMBRANE	280	-0.378395	-1.42287	0.00217637	0.0281964	0.0235184	3752	tags=32%, list=21%, signal=26%	53371/3710/25/9821/1956/163183/64783/9805/3840/23560/84629/6434/2597/84516/4925/9330/114882/221264/23333/51649/7779/10456/5058/10204/4928/1019/80314/51530/27000/4521/4599/55787/7341/2776/55183/22794/11270/9801/83860/7108/55706/10269/2081/10128/30832/51230/23236/23636/79902/57122/7514/23224/22929/6683/4086/23200/11335/23165/5903/6272/100101267/26057/3930/10927/4646/3249/59343/29843/9883/23369/7964…
GO_POSTREPLICATION_REPAIR	GO_POSTREPLICATION_REPAIR	48	-0.561213	-1.68637	0.00218695	0.028279	0.0235872	3384	tags=46%, list=19%, signal=37%	201973/5985/5983/7319/5429/51455/9100/5424/55666/6119/6117/83932/5427/5982/5980/10714/5981/672/4436/5984/5111/51514
GO_MISMATCH_REPAIR_COMPLEX_BINDING	GO_MISMATCH_REPAIR_COMPLEX_BINDING	11	-0.791615	-1.73549	0.00221452	0.0285258	0.0237931	2137	tags=64%, list=12%, signal=56%	4595/5395/254394/84515/4436/2956/5111
GO_CILIARY_BASE	GO_CILIARY_BASE	30	-0.633534	-1.74761	0.0022191	0.02853	0.0237966	4824	tags=67%, list=26%, signal=49%	55130/5891/8100/55112/51684/284086/22858/5567/27185/55764/5573/51098/5566/26146/440585/79989/255758/112942/7289/5577
GO_BASE_EXCISION_REPAIR	GO_BASE_EXCISION_REPAIR	43	-0.597647	-1.75967	0.00228293	0.0291031	0.0242746	2895	tags=53%, list=16%, signal=45%	27343/8930/55170/23201/10721/4595/5423/328/55247/5424/6119/6117/7374/6996/55031/3978/5426/10075/2237/10038/1763/3980/5111
GO_PROTEIN_BINDING_INVOLVED_IN_HETEROTYPIC_CELL_CELL_ADHESION	GO_PROTEIN_BINDING_INVOLVED_IN_HETEROTYPIC_CELL_CELL_ADHESION	13	-0.767792	-1.79899	0.00228531	0.0291031	0.0242746	1010	tags=54%, list=6%, signal=51%	1829/4897/23114/1832/1824/1525/5318
GO_POSITIVE_REGULATION_OF_TRANSCRIPTION_BY_RNA_POLYMERASE_I	GO_POSITIVE_REGULATION_OF_TRANSCRIPTION_BY_RNA_POLYMERASE_I	21	-0.674567	-1.729	0.00229255	0.0291401	0.0243054	4480	tags=76%, list=25%, signal=58%	23133/84135/7343/4691/55011/2064/2475/84128/23160/6872/1663/9451/56919/6597/25926/55127
GO_DENDRITIC_SPINE_DEVELOPMENT	GO_DENDRITIC_SPINE_DEVELOPMENT	97	-0.461507	-1.55276	0.002342	0.0296565	0.0247362	4308	tags=42%, list=24%, signal=32%	120892/10298/7074/1501/115703/10097/50807/57492/27185/7804/8851/8440/23380/5649/10152/2475/80823/10479/1627/54413/22941/65981/100132074/26037/10769/221935/80725/23613/4976/9231/2332/10059/1902/170506/9762/5062/4076/2049/55607/3066/5802
GO_METHIONINE_BIOSYNTHETIC_PROCESS	GO_METHIONINE_BIOSYNTHETIC_PROCESS	12	-0.784191	-1.77195	0.0023812	0.0300962	0.025103	1787	tags=50%, list=10%, signal=45%	4552/4548/51074/4522/23743/55256
GO_PROTEIN_AUTOUBIQUITINATION	GO_PROTEIN_AUTOUBIQUITINATION	66	-0.509169	-1.60897	0.00241733	0.0304384	0.0253883	5228	tags=52%, list=29%, signal=37%	90025/149603/151636/7337/56852/7322/1161/57630/9112/120892/4850/115426/26046/83737/153769/23328/57674/81847/50862/4193/7319/7189/9025/10193/6872/51283/114804/672/4591/138065/55128/54800/29128/29089
GO_MISMATCH_REPAIR	GO_MISMATCH_REPAIR	33	-0.623093	-1.75378	0.00246518	0.030753	0.0256507	2137	tags=58%, list=12%, signal=51%	27030/25/29072/4439/4595/10535/5424/6119/6117/5378/6996/5395/3978/254394/10714/4436/2956/5111/9156
GO_REGULATION_OF_HISTONE_H3_K4_METHYLATION	GO_REGULATION_OF_HISTONE_H3_K4_METHYLATION	27	-0.632032	-1.70487	0.00248771	0.0308622	0.0257419	4378	tags=56%, list=24%, signal=42%	7936/55011/54880/55904/90780/4297/23028/55170/26053/9646/22976/672/1786/4602/1789
GO_POSITIVE_REGULATION_OF_DNA_REPAIR	GO_POSITIVE_REGULATION_OF_DNA_REPAIR	56	-0.538803	-1.66503	0.0025704	0.0315967	0.0263545	5253	tags=59%, list=29%, signal=42%	7515/2255/54929/151636/57332/23514/1161/6419/2187/10459/23411/10097/55135/1956/1054/23201/55183/2521/9025/10155/23347/1663/1660/672/165918/79184/56907/5591/2305/5111/142/2139/8914
GO_PROTEIN_SUMOYLATION	GO_PROTEIN_SUMOYLATION	78	-0.497988	-1.62046	0.00260692	0.0319288	0.0266315	3816	tags=45%, list=21%, signal=36%	10401/26054/53371/54552/10055/57178/4928/83637/4193/10054/7341/81929/55706/405/23636/79902/57122/53335/348995/10155/23165/5903/100101267/205564/59343/29843/9883/55746/23279/9631/57691/6613/7175/23225/9972
GO_DNA_SECONDARY_STRUCTURE_BINDING	GO_DNA_SECONDARY_STRUCTURE_BINDING	24	-0.67582	-1.79432	0.00264248	0.0321885	0.0268481	1785	tags=46%, list=10%, signal=41%	55247/641/5889/348654/25913/7516/4436/3148/2956/5932/3149
GO_MITOTIC_METAPHASE_PLATE_CONGRESSION	GO_MITOTIC_METAPHASE_PLATE_CONGRESSION	44	-0.56134	-1.65509	0.00266876	0.0323913	0.0270172	3337	tags=41%, list=18%, signal=34%	54908/891/113130/81929/79003/23636/1062/8697/55143/11004/3837/3192/9928/81930/3833/81620/10403/83540
GO_ERROR_FREE_TRANSLESION_SYNTHESIS	GO_ERROR_FREE_TRANSLESION_SYNTHESIS	19	-0.696331	-1.75387	0.00268543	0.0325349	0.027137	3191	tags=63%, list=17%, signal=52%	5985/5983/5429/51455/55666/6119/6117/83932/5982/5981/5984/5111
GO_SMOOTHENED_SIGNALING_PATHWAY_INVOLVED_IN_DORSAL_VENTRAL_NEURAL_TUBE_PATTERNING	GO_SMOOTHENED_SIGNALING_PATHWAY_INVOLVED_IN_DORSAL_VENTRAL_NEURAL_TUBE_PATTERNING	14	-0.746322	-1.76652	0.00271712	0.0328006	0.0273586	3423	tags=86%, list=19%, signal=70%	51684/5567/221322/5727/55764/92344/5566/26146/57728/54903/7289/23432
GO_CENTROSOME_SEPARATION	GO_CENTROSOME_SEPARATION	15	-0.729564	-1.74627	0.00273626	0.0329134	0.0274528	4099	tags=80%, list=22%, signal=62%	64793/3834/5902/6790/79884/137886/23636/1111/54820/9371/3832/4751
GO_RNA_METHYLATION	GO_RNA_METHYLATION	69	-0.503387	-1.60992	0.0027481	0.0329968	0.0275223	4809	tags=46%, list=26%, signal=34%	10436/9589/57570/117246/96764/57721/51093/51106/54931/79872/64783/221078/63899/2091/79828/387338/79979/4839/80745/54888/55783/339175/81627/64216/23070/113802/51605/60487/63892/55006/8731/6894
GO_NEGATIVE_REGULATION_OF_HISTONE_METHYLATION	GO_NEGATIVE_REGULATION_OF_HISTONE_METHYLATION	18	-0.707006	-1.74908	0.00279048	0.0333271	0.0277978	4059	tags=72%, list=22%, signal=56%	55011/23411/54880/55818/23028/55170/22823/4302/6830/672/1786/3720/1789
GO_CYTOPLASMIC_MICROTUBULE	GO_CYTOPLASMIC_MICROTUBULE	63	-0.519943	-1.63278	0.00281841	0.033586	0.0280137	2395	tags=37%, list=13%, signal=32%	636/51512/324/79884/10376/7846/22919/9751/7283/51308/51626/23332/150737/22832/11004/92104/84140/81930/54627/126731/146909/283987/85462
GO_EXODEOXYRIBONUCLEASE_ACTIVITY	GO_EXODEOXYRIBONUCLEASE_ACTIVITY	21	-0.66993	-1.71711	0.002825	0.033586	0.0280137	1994	tags=52%, list=11%, signal=47%	112479/64789/328/5810/64858/5424/92667/5426/2237/9937/9156
GO_NEGATIVE_REGULATION_OF_TELOMERE_MAINTENANCE	GO_NEGATIVE_REGULATION_OF_TELOMERE_MAINTENANCE	34	-0.621519	-1.75221	0.00283443	0.0336085	0.0280325	5368	tags=71%, list=29%, signal=50%	65057/7515/8658/6714/84464/54464/23293/80119/472/54552/10111/80169/4683/3178/7014/80351/3183/167227/7520/2072/25913/55226/3192/142
GO_REGULATION_OF_DNA_TEMPLATED_TRANSCRIPTION_ELONGATION	GO_REGULATION_OF_DNA_TEMPLATED_TRANSCRIPTION_ELONGATION	49	-0.534931	-1.60998	0.00283903	0.0336085	0.0280325	3222	tags=47%, list=18%, signal=39%	8861/6829/905/10771/23476/79577/9646/10189/9400/9025/51497/22828/27336/23160/904/11198/7919/9984/6830/51755/3192/165918/2146
GO_NEURAL_TUBE_FORMATION	GO_NEURAL_TUBE_FORMATION	104	-0.461526	-1.56432	0.00286203	0.0338213	0.02821	3842	tags=46%, list=21%, signal=37%	11146/25/10427/8321/2535/5567/5727/55764/29072/51098/80199/836/79600/5566/9585/57822/84678/1856/6422/7403/317/2909/7189/54903/8289/8543/7976/26160/54910/5754/57619/4036/7289/6768/6491/1857/7042/57534/4522/9968/3091/2348/4040/655/6659/8463/57216/6664
GO_SOLUTE_SODIUM_SYMPORTER_ACTIVITY	GO_SOLUTE_SODIUM_SYMPORTER_ACTIVITY	75	-0.497655	-1.60875	0.00290234	0.0341775	0.0285071	3169	tags=21%, list=17%, signal=18%	6526/9962/84879/6506/6574/9058/6511/8884/6523/64078/28968/6505/81539/10568/6558/11254
GO_PROTEIN_POLYUBIQUITINATION	GO_PROTEIN_POLYUBIQUITINATION	301	-0.368225	-1.39939	0.00297173	0.0348724	0.0290868	5355	tags=44%, list=29%, signal=31%	7328/27339/80196/144699/2874/90025/5987/8658/56254/149603/5693/8452/151636/7337/27338/7322/1499/26268/57542/5710/5687/154214/29945/84085/54542/1161/143471/10013/22954/80829/9690/5691/7314/10213/6048/80028/23291/55072/8945/54941/55008/4779/85363/5716/257218/494470/81545/5707/51434/5704/7267/83737/84937/126433/26259/23328/580/91694/54476/10477/149041/57674/81847/5706/5713/331/23014/57531/9870/4193/…
GO_REGULATION_OF_CENTRIOLE_REPLICATION	GO_REGULATION_OF_CENTRIOLE_REPLICATION	21	-0.668611	-1.71373	0.00300249	0.035172	0.0293366	2427	tags=76%, list=13%, signal=66%	2648/4869/153241/8850/55835/79959/56890/7840/85459/23636/10769/152185/10733/6491/672/4591
GO_PROTEIN_METHYLTRANSFERASE_ACTIVITY	GO_PROTEIN_METHYLTRANSFERASE_ACTIVITY	73	-0.502527	-1.61714	0.00301647	0.0352131	0.0293709	5686	tags=58%, list=31%, signal=40%	79823/9739/4221/9070/64754/115294/196483/7799/79918/5110/10498/6839/55471/80854/6419/79813/151194/79091/51451/8085/3276/29072/25940/2122/2091/4297/64324/10196/10419/58508/55170/55251/55209/90826/80204/55870/5929/9869/79723/10919/2146/23512
GO_REGULATION_OF_NUCLEOBASE_CONTAINING_COMPOUND_TRANSPORT	GO_REGULATION_OF_NUCLEOBASE_CONTAINING_COMPOUND_TRANSPORT	16	-0.711418	-1.71594	0.00303967	0.0352902	0.0294352	3827	tags=69%, list=21%, signal=54%	54439/8737/29072/55677/22916/11052/6830/1660/7175/9972/134
GO_CYTOPLASMIC_REGION	GO_CYTOPLASMIC_REGION	235	-0.389006	-1.44072	0.00304407	0.0352902	0.0294352	5418	tags=37%, list=30%, signal=27%	4133/23710/84260/26059/84100/83544/5048/9474/6792/1639/667/89876/1499/25876/66008/79882/55130/55081/10564/821/22863/89958/6787/140730/10121/120892/23322/9026/85478/55212/55717/1641/4137/84062/55626/27445/6421/1500/23122/30849/5573/79659/282991/5566/54443/7014/167691/26146/7802/231/11127/79971/3799/57539/26090/6416/22920/26985/2035/10947/23095/8701/6683/26160/10497/4976/51626/255758/23332/2332/150…
GO_DNA_DAMAGE_RESPONSE_DETECTION_OF_DNA_DAMAGE	GO_DNA_DAMAGE_RESPONSE_DETECTION_OF_DNA_DAMAGE	38	-0.592861	-1.70389	0.0030588	0.0354	0.0295268	2243	tags=45%, list=12%, signal=39%	5985/5983/64965/8450/4750/5424/6119/6117/7398/5982/10714/5981/5984/6659/5111/142/51514
GO_CYTOPLASMIC_STRESS_GRANULE	GO_CYTOPLASMIC_STRESS_GRANULE	61	-0.527218	-1.66158	0.00316998	0.0364358	0.0303907	4006	tags=61%, list=22%, signal=48%	4904/11269/4154/23185/26065/55308/26058/1654/10146/23435/113251/3190/23367/7073/57521/8761/149041/11273/1656/132430/22794/6780/4343/6093/8570/1994/5563/2886/7072/2332/80336/23369/9908/57532/3837/170506/4076
GO_REGULATION_OF_SMOOTHENED_SIGNALING_PATHWAY	GO_REGULATION_OF_SMOOTHENED_SIGNALING_PATHWAY	80	-0.486658	-1.58791	0.00319372	0.0364603	0.0304112	5445	tags=57%, list=30%, signal=41%	916/5992/84100/22856/2255/3340/2121/5082/80210/2263/51684/23322/374654/55717/8945/5567/51174/5727/55764/92344/79659/80199/5167/79600/5566/1495/26146/83871/7545/6422/27152/79809/84976/54903/1387/26005/26160/9231/7289/27148/28981/3169/23432/222663/2719/6608
GO_DNA_UNWINDING_INVOLVED_IN_DNA_REPLICATION	GO_DNA_UNWINDING_INVOLVED_IN_DNA_REPLICATION	14	-0.739996	-1.75154	0.0031938	0.0364603	0.0304112	1970	tags=57%, list=11%, signal=51%	9400/641/6117/4176/5965/4173/4171/4175
GO_REGULATION_OF_HEPATOCYTE_PROLIFERATION	GO_REGULATION_OF_HEPATOCYTE_PROLIFERATION	14	-0.740385	-1.75246	0.0031938	0.0364603	0.0304112	1234	tags=36%, list=7%, signal=33%	55294/3249/634/5469/4192
GO_FOUR_WAY_JUNCTION_DNA_BINDING	GO_FOUR_WAY_JUNCTION_DNA_BINDING	16	-0.709873	-1.71221	0.00322024	0.0366998	0.030611	1522	tags=56%, list=8%, signal=52%	5892/641/5889/348654/7516/4436/3148/2956/3149
GO_SPLICEOSOMAL_COMPLEX_ASSEMBLY	GO_SPLICEOSOMAL_COMPLEX_ASSEMBLY	56	-0.530537	-1.63949	0.00325281	0.0369458	0.0308161	4131	tags=48%, list=23%, signal=37%	58155/10772/6936/9416/6431/10659/6632/23064/4686/6426/10713/10946/51747/79833/6733/6635/23451/10658/9169/51340/23020/7919/27316/8487/11168/135295/6732
GO_SERINE_THREONINE_PROTEIN_KINASE_COMPLEX	GO_SERINE_THREONINE_PROTEIN_KINASE_COMPLEX	86	-0.471283	-1.55397	0.00326496	0.0370212	0.030879	4640	tags=47%, list=25%, signal=35%	92/2967/983/7405/10983/896/9133/2071/8621/9821/5257/2068/8851/8408/891/1019/905/23085/85417/898/2968/2081/901/5218/1164/6885/904/1147/54619/140775/51755/260434/899/890/900/9134/1017/5255/5111/79616
GO_RESPONSE_TO_RADIATION	GO_RESPONSE_TO_RADIATION	423	-0.349254	-1.35041	0.00329532	0.0371774	0.0310093	3835	tags=31%, list=21%, signal=25%	120227/581/23411/2033/6507/8831/675/4867/1956/94241/545/10988/63943/5158/2068/472/5481/54962/9575/8704/201973/90381/10010/3845/3157/55872/2189/10413/23173/836/9397/85461/6506/5501/2177/84446/10276/23028/4193/2002/8930/25836/6422/7319/163859/1385/2885/2776/5429/51435/1432/51455/1196/2235/2475/8450/5743/5602/65123/8491/5423/9025/54413/5810/7520/10269/3688/5796/5424/8493/9094/11200/50848/641/7398/22…
GO_NUCLEOTIDYLTRANSFERASE_ACTIVITY	GO_NUCLEOTIDYLTRANSFERASE_ACTIVITY	116	-0.447794	-1.54229	0.00337631	0.0379191	0.0316279	3866	tags=41%, list=21%, signal=32%	349565/25/27297/9468/4938/201973/6675/10914/5422/8891/221830/9061/11128/27343/7014/10728/55149/7360/5130/5433/5429/55907/51455/4939/10721/11232/10621/5423/25885/80308/5437/5424/4940/5558/5430/9412/1736/5427/5426/87178/9477/5980/10714/5431/8732/84172/5557
GO_H4_HISTONE_ACETYLTRANSFERASE_COMPLEX	GO_H4_HISTONE_ACETYLTRANSFERASE_COMPLEX	40	-0.573071	-1.66614	0.00337798	0.0379191	0.0316279	4463	tags=65%, list=24%, signal=49%	2648/10445/8850/26122/55257/54934/64769/9643/3054/55167/26009/57634/55683/80314/55929/10902/51562/151050/6885/284058/9898/8295/8089/339287/55689/86
GO_NUCLEAR_LOCALIZATION_SEQUENCE_BINDING	GO_NUCLEAR_LOCALIZATION_SEQUENCE_BINDING	25	-0.654858	-1.73965	0.00343614	0.0382718	0.0319222	3912	tags=48%, list=21%, signal=38%	26953/3842/3840/4928/30000/9221/100101267/9883/3841/3837/3838/9972
GO_CHROMOSOME_CONDENSATION	GO_CHROMOSOME_CONDENSATION	32	-0.604934	-1.69518	0.00343983	0.0382718	0.0319222	4815	tags=53%, list=26%, signal=39%	79142/983/5619/51203/22985/891/113130/23310/25836/9131/10592/10051/9918/64151/54892/23397/7153
GO_REGULATION_OF_CHROMATIN_SILENCING	GO_REGULATION_OF_CHROMATIN_SILENCING	24	-0.668374	-1.77455	0.00343983	0.0382718	0.0319222	3818	tags=67%, list=21%, signal=53%	23411/79829/25942/3159/57343/5253/80312/22880/10155/54454/25842/29028/55729/8318/9869/1786
GO_CYSTEINE_TYPE_ENDOPEPTIDASE_ACTIVITY	GO_CYSTEINE_TYPE_ENDOPEPTIDASE_ACTIVITY	113	-0.447168	-1.53429	0.00349504	0.0387129	0.03229	2731	tags=25%, list=15%, signal=21%	11274/115201/6422/23358/23032/8078/8239/9100/84132/7874/7398/8975/55031/84640/57646/9097/57695/59343/9700/260434/835/9736/839/642/25862/92291/827/7345
GO_NEGATIVE_REGULATION_OF_DNA_RECOMBINATION	GO_NEGATIVE_REGULATION_OF_DNA_RECOMBINATION	28	-0.628498	-1.71314	0.00350241	0.0387129	0.03229	2827	tags=46%, list=15%, signal=39%	7014/55010/55183/10721/9400/641/9984/23347/64110/4436/56893/2956/116028
GO_TUBE_FORMATION	GO_TUBE_FORMATION	147	-0.426832	-1.50563	0.00350627	0.0387129	0.03229	3615	tags=38%, list=20%, signal=31%	10427/8321/2535/5567/5727/55764/29072/51098/80199/10018/836/79600/5566/9585/5979/57822/84678/23405/1856/6422/7403/317/2909/7189/54903/8289/8543/7976/26160/54910/51804/5754/57619/4036/7289/6768/6491/1857/10806/5420/7042/57534/4522/9968/6662/3091/6495/2348/4040/655/6659/4781/8463/79192/57216/6664
GO_NUCLEOSOMAL_DNA_BINDING	GO_NUCLEOSOMAL_DNA_BINDING	24	-0.667509	-1.77225	0.0035499	0.0391303	0.0326382	1813	tags=54%, list=10%, signal=49%	1108/3183/5928/6603/6605/6601/6599/57459/79366/6597/86/9324/3066
GO_RIBONUCLEOPROTEIN_COMPLEX_BINDING	GO_RIBONUCLEOPROTEIN_COMPLEX_BINDING	123	-0.436565	-1.50742	0.00357161	0.0393053	0.0327841	4120	tags=44%, list=23%, signal=34%	79048/1460/253260/1654/10465/23293/55759/6632/6729/26046/83939/23367/9775/83737/6629/29789/7917/9147/10196/92609/10419/55176/54915/4830/51068/60558/4193/55037/6726/9221/6185/2475/84282/11052/1655/80155/6059/6730/25929/7374/4528/4931/2332/6731/1660/56919/127933/85451/26284/3192/23468/57510/2146/84295
GO_REGULATION_OF_ORGANELLE_ASSEMBLY	GO_REGULATION_OF_ORGANELLE_ASSEMBLY	186	-0.402182	-1.45592	0.00361542	0.0396575	0.0330779	5390	tags=46%, list=29%, signal=33%	84260/2648/57787/6386/9474/6792/51364/116840/4869/153241/8850/79142/7419/57132/8100/3304/57472/6714/55835/5305/51112/29978/10274/120892/6048/3064/5789/23256/9637/10146/26054/50807/57533/51256/8027/5347/80199/8408/9924/79837/4848/11273/9662/23300/2909/79959/200576/3936/56890/7840/23019/85459/22873/79598/57622/5563/57489/23636/10769/23224/9181/5962/9126/51626/9738/255758/152185/8396/10735/140775/10…
GO_CYTOSKELETON_DEPENDENT_CYTOKINESIS	GO_CYTOSKELETON_DEPENDENT_CYTOKINESIS	83	-0.471296	-1.55218	0.00372052	0.0406315	0.0338903	3809	tags=37%, list=21%, signal=30%	10097/403/23503/27443/3619/5347/54443/9585/54902/324/79884/9475/9493/9820/11113/6093/6711/9094/23636/6683/55165/29127/9700/1058/24137/56907/9212/3925/1894/10112/4628
GO_SOMATIC_DIVERSIFICATION_OF_IMMUNE_RECEPTORS_VIA_SOMATIC_MUTATION	GO_SOMATIC_DIVERSIFICATION_OF_IMMUNE_RECEPTORS_VIA_SOMATIC_MUTATION	14	-0.733846	-1.73698	0.00373655	0.0406315	0.0338903	2895	tags=64%, list=16%, signal=54%	27343/10721/5423/7374/5395/103/4436/2956/9156
GO_REGULATION_OF_METHYLATION_DEPENDENT_CHROMATIN_SILENCING	GO_REGULATION_OF_METHYLATION_DEPENDENT_CHROMATIN_SILENCING	11	-0.777445	-1.70442	0.00380116	0.0410916	0.0342741	2615	tags=64%, list=14%, signal=55%	57343/80312/22880/10155/55729/9869/1786
GO_CILIARY_TRANSITION_ZONE	GO_CILIARY_TRANSITION_ZONE	63	-0.509156	-1.5989	0.00386594	0.0416347	0.0347271	4880	tags=48%, list=27%, signal=35%	57545/55081/4647/84314/80184/6787/23322/91147/79583/54806/4867/403/27241/55764/51098/79600/167691/26146/22920/57728/54903/9657/1069/22994/65062/51626/112942/79867/84140/126731
GO_DNA_METHYLATION	GO_DNA_METHYLATION	64	-0.503656	-1.58556	0.00386594	0.0416347	0.0347271	3334	tags=52%, list=18%, signal=42%	4204/79813/5290/9219/54069/11176/55904/4297/91646/10419/55929/201164/10269/4552/8493/200424/10155/10664/546/57673/55729/672/6018/2778/10919/1786/163589/11022/1788/2146/221656/142/1789
GO_HOST_CELLULAR_COMPONENT	GO_HOST_CELLULAR_COMPONENT	72	-0.49283	-1.58572	0.00390054	0.0417966	0.0348621	3233	tags=42%, list=18%, signal=34%	4589/4928/5297/9397/155382/636/81929/4343/55706/7155/23636/79902/57122/7514/348995/23165/5903/100101267/2332/9883/3837/55746/8934/23279/9631/7175/23225/3838/9972/7153
GO_TRANSCRIPTION_BY_RNA_POLYMERASE_I	GO_TRANSCRIPTION_BY_RNA_POLYMERASE_I	59	-0.509148	-1.59638	0.003923	0.0419368	0.0349791	4519	tags=53%, list=25%, signal=40%	2967/6949/23133/2071/84135/7343/4691/55011/11176/2068/221830/2064/2968/54700/2475/84128/10269/25885/5437/23160/9014/6872/9015/1663/9451/56919/84172/6597/25926/55127/5469
GO_NUCLEAR_PORE_ORGANIZATION	GO_NUCLEAR_PORE_ORGANIZATION	14	-0.731938	-1.73247	0.00399204	0.0425395	0.0354818	2143	tags=79%, list=12%, signal=69%	53371/4928/81929/55706/124491/57122/23165/55746/7175/25909/9972
GO_MORPHOGENESIS_OF_A_POLARIZED_EPITHELIUM	GO_MORPHOGENESIS_OF_A_POLARIZED_EPITHELIUM	140	-0.416194	-1.45654	0.00402534	0.0427988	0.0356981	4648	tags=43%, list=25%, signal=32%	143471/144165/89958/23245/5691/10213/7074/23322/10890/54806/57662/25/5716/163183/10427/8321/9368/5707/50855/2535/5704/284217/80199/22881/5706/26146/5713/84446/57822/10640/1856/6422/27152/1213/5709/10197/4300/1741/5708/7855/64750/57664/54903/4919/7976/9231/5754/5718/1857/4983/9968/5717/128272/22943/163/2239/23198/2719/8324/57216
GO_DNA_METHYLATION_OR_DEMETHYLATION	GO_DNA_METHYLATION_OR_DEMETHYLATION	87	-0.464441	-1.53781	0.00403546	0.0427988	0.0356981	3334	tags=48%, list=18%, signal=40%	7490/221120/4204/27350/79813/5290/9219/54069/11176/55904/4297/91646/10419/55929/201164/54790/8239/7874/328/80312/10269/4552/8493/200424/6996/10155/10664/546/57673/55729/672/6018/2778/10919/1786/163589/11022/1788/2146/221656/142/1789
GO_MITOTIC_CYTOKINESIS	GO_MITOTIC_CYTOKINESIS	69	-0.495565	-1.5849	0.00403546	0.0427988	0.0356981	3633	tags=39%, list=20%, signal=31%	403/23503/3619/5347/54443/9585/54902/324/79884/9475/9493/9820/11113/6093/6711/9094/23636/6683/55165/29127/9700/1058/24137/3925/1894/10112/4628
GO_MAINTENANCE_OF_CELL_NUMBER	GO_MAINTENANCE_OF_CELL_NUMBER	160	-0.411466	-1.47148	0.00406933	0.04309	0.035941	3222	tags=32%, list=18%, signal=27%	8861/140467/10413/55818/8202/4848/2177/6944/25836/84678/6422/5433/1656/22823/55183/9282/27097/678/60485/6774/79577/23019/9646/657/80312/5978/5437/23160/8289/1994/5430/9412/22882/79692/9126/2176/5431/6657/9968/6662/5087/259266/607/8243/2146/655/6659/3815/8324/6608/2001/57216
GO_MITOCHONDRIAL_DNA_METABOLIC_PROCESS	GO_MITOCHONDRIAL_DNA_METABOLIC_PROCESS	13	-0.743671	-1.74247	0.00414352	0.0437379	0.0364814	2049	tags=54%, list=11%, signal=48%	11232/92667/219736/1763/7156/3980/142
GO_CELLULAR_RESPONSE_TO_HEAT	GO_CELLULAR_RESPONSE_TO_HEAT	130	-0.430124	-1.49365	0.00418124	0.0440669	0.0367558	3975	tags=38%, list=22%, signal=30%	81570/4137/23411/2033/53371/2288/545/472/1616/2932/4928/57521/27000/5566/10728/5433/7341/817/79031/488/2475/5743/81929/3326/51182/55706/7531/23636/79902/57122/6119/6117/348995/1387/5931/23165/5903/100101267/9883/3298/170506/55746/23279/3320/9631/7175/23225/4763/9972/3066
GO_TRNA_BINDING	GO_TRNA_BINDING	52	-0.52281	-1.59318	0.00421511	0.044285	0.0369377	4679	tags=42%, list=26%, signal=32%	1968/57505/112487/54931/51091/221078/54938/83939/63899/9147/6741/10667/11260/54888/55157/81627/91607/51067/55699/60487/146857/57510
GO_REGULATION_OF_RNA_SPLICING	GO_REGULATION_OF_RNA_SPLICING	138	-0.434918	-1.51867	0.00430678	0.0450735	0.0375954	5339	tags=50%, list=29%, signal=36%	6651/27339/29896/4154/10179/23210/8241/4869/55696/91746/9589/6428/494115/10657/55544/58155/83759/4691/10772/6431/282996/64783/10659/3185/6434/3190/23076/23064/140890/10262/9967/4928/4686/9588/6426/3178/10656/58517/6432/57703/1196/4116/84991/3187/3191/6427/2521/11338/6733/2081/54845/5978/1655/10658/3181/5430/80004/7072/27316/9513/55796/84081/5295/2332/51755/8087/3192/135295/6732
GO_UBIQUITIN_LIKE_PROTEIN_LIGASE_ACTIVITY	GO_UBIQUITIN_LIKE_PROTEIN_LIGASE_ACTIVITY	224	-0.383506	-1.41322	0.00431027	0.0450735	0.0375954	4236	tags=34%, list=23%, signal=27%	285533/6048/9867/80028/26036/23291/115426/8945/54941/10401/55167/257218/79872/494470/26046/79589/83737/57178/84937/153769/126433/84461/54476/149041/81847/6015/64219/331/57531/83637/9870/4193/57162/868/7189/23376/51444/57820/55148/23304/25897/79018/9025/64750/57161/51132/10193/5930/130507/9412/9666/9354/255488/9477/29116/51283/6596/114804/117584/10075/8805/6045/55120/54467/9968/23321/54894/63893/4…
GO_SINGLE_STRANDED_DNA_HELICASE_ACTIVITY	GO_SINGLE_STRANDED_DNA_HELICASE_ACTIVITY	17	-0.705944	-1.7324	0.0043471	0.0452475	0.0377405	4076	tags=82%, list=22%, signal=64%	63922/80119/4174/5985/5983/10721/79075/5982/4176/1660/1763/5984/4171/4175
GO_MISMATCHED_DNA_BINDING	GO_MISMATCHED_DNA_BINDING	14	-0.729652	-1.72706	0.00437526	0.0454703	0.0379263	2861	tags=71%, list=16%, signal=60%	4437/27030/4439/4595/5378/6996/5395/4436/2956/5111
GO_EPITHELIAL_TUBE_FORMATION	GO_EPITHELIAL_TUBE_FORMATION	132	-0.423826	-1.47336	0.00440084	0.0456655	0.0380891	3615	tags=39%, list=20%, signal=32%	10427/8321/2535/5567/5727/55764/29072/51098/80199/836/79600/5566/9585/5979/57822/84678/1856/6422/7403/317/2909/7189/54903/8289/8543/7976/26160/54910/51804/5754/57619/4036/7289/6768/6491/1857/5420/7042/57534/4522/9968/6662/3091/6495/2348/4040/655/6659/8463/79192/57216/6664
GO_KINETOCHORE_ASSEMBLY	GO_KINETOCHORE_ASSEMBLY	14	-0.728796	-1.72503	0.00450301	0.0465103	0.0387938	4458	tags=86%, list=24%, signal=65%	51112/80152/26054/64105/64946/55839/79003/1062/1058/23126/387103/1063
GO_G2_DNA_DAMAGE_CHECKPOINT	GO_G2_DNA_DAMAGE_CHECKPOINT	25	-0.646367	-1.7171	0.00453779	0.0467977	0.0390335	4513	tags=68%, list=25%, signal=51%	983/1112/60561/472/5347/4683/4303/84446/641/8555/29980/672/1111/79184/63967/57551/51514
GO_PERICENTRIC_HETEROCHROMATIN	GO_PERICENTRIC_HETEROCHROMATIN	18	-0.69064	-1.7086	0.00456651	0.0469498	0.0391604	3316	tags=67%, list=18%, signal=55%	157570/3619/23310/10320/11335/546/1058/23468/9031/1786/3070/10951
GO_RNA_POLYMERASE_II_REPRESSING_TRANSCRIPTION_FACTOR_BINDING	GO_RNA_POLYMERASE_II_REPRESSING_TRANSCRIPTION_FACTOR_BINDING	35	-0.596212	-1.69322	0.00465467	0.0476377	0.0397342	4855	tags=57%, list=27%, signal=42%	79738/3516/9112/5465/9219/55212/583/2957/25942/6667/1108/6934/55929/6774/5467/10915/57504/2627/5932/3066
GO_PRONUCLEUS	GO_PRONUCLEUS	15	-0.71441	-1.71	0.00472664	0.0482276	0.0402261	2404	tags=53%, list=13%, signal=46%	55183/6790/3191/200424/890/2146/10951/1063
GO_REPLICATION_FORK_PROCESSING	GO_REPLICATION_FORK_PROCESSING	29	-0.611262	-1.6738	0.00476069	0.048428	0.0403933	4791	tags=69%, list=26%, signal=51%	50485/4796/25939/6419/57697/675/201973/259282/10189/641/348654/9984/146956/253714/1663/546/1763/55159/5111/64710
GO_SPERMATID_NUCLEUS_DIFFERENTIATION	GO_SPERMATID_NUCLEUS_DIFFERENTIATION	18	-0.689233	-1.70511	0.00481169	0.0488728	0.0407643	3658	tags=50%, list=20%, signal=40%	3267/6847/90780/55818/26108/9025/3148/6732/23198
GO_RESPONSE_TO_HYDROXYUREA	GO_RESPONSE_TO_HYDROXYUREA	11	-0.771676	-1.69177	0.00484077	0.0490201	0.0408872	1522	tags=55%, list=8%, signal=50%	641/11143/2332/1663/546/8914
GO_DEMETHYLASE_ACTIVITY	GO_DEMETHYLASE_ACTIVITY	36	-0.572875	-1.63246	0.00490114	0.0492257	0.0410587	5148	tags=56%, list=28%, signal=40%	23210/22992/79068/221120/23133/23135/55818/23028/84678/7403/5253/8242/54890/25974/9682/51780/5927/10765/221656/3720
GO_UBIQUITIN_LIKE_PROTEIN_LIGASE_BINDING	GO_UBIQUITIN_LIKE_PROTEIN_LIGASE_BINDING	299	-0.361584	-1.37221	0.00490179	0.0492257	0.0410587	3907	tags=32%, list=21%, signal=26%	155061/55072/89885/5094/7188/11146/9627/5080/55135/8737/55626/51465/1956/257218/5707/8027/5567/171392/83737/5573/8065/10010/1616/51438/23113/2932/7917/891/9588/811/5566/28951/23381/4193/7326/152137/7319/7341/11065/10576/22794/7189/6790/324/3329/10376/10152/9810/8450/84557/9820/2861/1741/55353/3326/7855/292/7874/9025/1191/7531/7520/143384/10128/9258/55666/11200/4090/5430/10155/8975/55294/22926/516…
GO_NEGATIVE_REGULATION_OF_TELOMERE_MAINTENANCE_VIA_TELOMERE_LENGTHENING	GO_NEGATIVE_REGULATION_OF_TELOMERE_MAINTENANCE_VIA_TELOMERE_LENGTHENING	25	-0.64316	-1.70858	0.004905	0.0492257	0.0410587	5368	tags=72%, list=29%, signal=51%	65057/8658/6714/84464/54464/80119/54552/80169/3178/7014/80351/3183/167227/2072/25913/55226/3192/142
GO_ERROR_PRONE_TRANSLESION_SYNTHESIS	GO_ERROR_PRONE_TRANSLESION_SYNTHESIS	20	-0.668832	-1.69851	0.00491237	0.0492262	0.041059	3191	tags=70%, list=17%, signal=58%	7314/10459/5985/5983/5429/51455/6119/6117/5427/5982/5980/5981/5984/5111
