# Supplementary material for: Screening of DNA Damage Repair Genes Involved in the Prognosis of Triple-Negative Breast Cancer Patients Based on Bioinformatics
Source: Research Square preprint supplement (doi:10.21203/rs.3.rs-594124/v1), 2021-06-11
Supplement: Supplementary file 2 [file de439662b32d1e844f7ea0a1.xlsx]

## Sheet: High-risk group KEGG
ID	Description	setSize	enrichmentScore	NES	pvalue	p.adjust	qvalues	rank	leading_edge	core_enrichment
KEGG_RIBOSOME	KEGG_RIBOSOME	87	0.697958	2.62056	1e-10	1.84e-08	1.41053e-08	3125	tags=66%, list=17%, signal=55%	6209/6142/11224/9045/6159/6132/3921/6137/6161/6176/6156/6122/51187/6218/6207/2197/6135/6228/6146/6129/6203/6223/6138/6124/6175/51065/25873/6130/6141/6227/6164/6125/6158/6235/6133/6128/6168/6181/6187/6194/6171/6202/4736/28998/6191/6144/6155/6188/6224/6152/6217/6204/6136/6210/6234/6230/6231
KEGG_AUTOIMMUNE_THYROID_DISEASE	KEGG_AUTOIMMUNE_THYROID_DISEASE	50	0.653857	2.21214	9.9156e-07	6.08157e-05	4.66207e-05	3389	tags=40%, list=19%, signal=33%	3134/3107/3105/3106/3115/3123/3133/3119/3135/3117/3108/3109/3122/355/3113/942/3127/3118/958/3111
KEGG_COMPLEMENT_AND_COAGULATION_CASCADES	KEGG_COMPLEMENT_AND_COAGULATION_CASCADES	69	0.574421	2.062	4.12274e-06	0.000189646	0.000145381	2616	tags=39%, list=14%, signal=34%	2161/712/7056/5054/5328/718/1675/5627/713/717/5329/710/714/721/2159/5265/3075/715/2155/7450/2149/2/2162/719/720/5327/2152
KEGG_GRAFT_VERSUS_HOST_DISEASE	KEGG_GRAFT_VERSUS_HOST_DISEASE	37	0.687774	2.17405	6.47205e-06	0.000238171	0.00018258	3389	tags=62%, list=19%, signal=51%	3134/3107/3105/3106/3115/3553/3123/3133/3119/3135/3117/3108/3109/3569/3122/7124/355/3113/942/3127/3118/3552/3111
KEGG_FOCAL_ADHESION	KEGG_FOCAL_ADHESION	197	0.396085	1.6755	1.2483e-05	0.000328125	0.000251537	2454	tags=30%, list=13%, signal=26%	10398/3914/1292/1291/5155/399694/595/857/5159/50509/7408/3675/858/5880/7791/7424/87/5293/5228/4638/3725/572/3480/9564/1293/5154/1289/7423/5728/3678/22801/1281/25759/3265/8516/10319/10000/3913/7409/1277/3909/3918/3672/2316/3693/1311/2324/5881/3381/7450/2321/1278/6696/3082/7422/2318/3791/63923/3679
KEGG_ALLOGRAFT_REJECTION	KEGG_ALLOGRAFT_REJECTION	35	0.670305	2.07792	2.46681e-05	0.000567366	0.000434937	3389	tags=60%, list=19%, signal=49%	3134/3107/3105/3106/3115/3123/3133/3119/3135/3117/3108/3109/3122/7124/355/3113/942/3127/3118/958/3111
KEGG_SYSTEMIC_LUPUS_ERYTHEMATOSUS	KEGG_SYSTEMIC_LUPUS_ERYTHEMATOSUS	54	0.581394	1.96665	4.2761e-05	0.000786803	0.000603155	3632	tags=52%, list=20%, signal=42%	712/718/87/3115/713/717/714/3123/3119/721/3117/3108/2214/3109/715/3122/2209/7124/720/3113/942/1511/3127/3118/958/3111/732/716
KEGG_TYPE_I_DIABETES_MELLITUS	KEGG_TYPE_I_DIABETES_MELLITUS	41	0.622138	2.00877	4.98744e-05	0.000834262	0.000639537	3389	tags=59%, list=19%, signal=48%	3134/3107/5799/3105/3106/3115/3553/3123/3133/3119/3135/3117/3108/5798/3109/3122/7124/355/3113/942/3127/3118/3552/3111
KEGG_OXIDATIVE_PHOSPHORYLATION	KEGG_OXIDATIVE_PHOSPHORYLATION	101	0.468176	1.78778	8.39382e-05	0.00128705	0.000986643	4059	tags=53%, list=22%, signal=42%	1346/10312/1537/1345/84701/56901/1351/9550/374291/4715/10975/4713/525/245972/1327/7384/170712/6390/4723/4700/7381/1347/8992/1349/1340/29796/4712/1337/529/4728/527/51382/526/4716/126328/4724/7386/533/4702/4729/528/4726/10063/1329/9377/4708/4706/27089/4695/1350/9296/4707/7385/125965
KEGG_CARDIAC_MUSCLE_CONTRACTION	KEGG_CARDIAC_MUSCLE_CONTRACTION	73	0.507502	1.85757	0.000103969	0.00147156	0.00112808	4059	tags=47%, list=22%, signal=36%	7169/1346/1537/1345/84701/1351/10975/478/1327/7168/7384/170712/7381/1347/6548/1349/1340/29796/1337/27092/482/93589/7386/476/775/4634/1329/9377/27089/1350/7137/7385/786/125965
KEGG_CYTOKINE_CYTOKINE_RECEPTOR_INTERACTION	KEGG_CYTOKINE_CYTOKINE_RECEPTOR_INTERACTION	261	0.337196	1.47292	0.000221091	0.00271205	0.00207903	2753	tags=25%, list=15%, signal=21%	9547/7293/7040/5155/414062/5159/8764/10673/6348/7424/6361/6366/8784/6387/3553/5008/51330/3563/27190/5154/7043/3601/1436/94/7423/8744/1435/80301/4050/7850/5473/3625/3624/8742/56477/3569/6367/2324/6351/2056/8793/2321/650/8794/608/3588/3082/7124/1437/4055/7422/355/2826/3791/3594/2057/58191/1440/3589/3606/6370/8600/6368/8718
KEGG_ASTHMA	KEGG_ASTHMA	28	0.65681	1.96542	0.000286603	0.00329593	0.00252663	3389	tags=50%, list=19%, signal=41%	3115/3123/3119/2207/3117/3108/3109/3122/7124/3113/3127/3118/958/3111
KEGG_PARKINSONS_DISEASE	KEGG_PARKINSONS_DISEASE	99	0.429465	1.64636	0.00068007	0.00736076	0.00564269	4131	tags=48%, list=23%, signal=38%	1346/1537/1345/84701/56901/1351/293/374291/4715/10975/4713/118424/11315/1327/7384/170712/7054/65018/6390/4723/4700/7381/1347/1349/1340/29796/4712/1337/4728/7417/4716/4724/7386/4702/4729/4726/1329/9377/4708/4706/7318/27089/4695/1350/4707/7385/125965/27429
KEGG_ANTIGEN_PROCESSING_AND_PRESENTATION	KEGG_ANTIGEN_PROCESSING_AND_PRESENTATION	81	0.464847	1.73324	0.000940077	0.00960967	0.00736668	2734	tags=33%, list=15%, signal=28%	567/3134/3107/3105/3106/6891/3115/3123/3133/3119/1508/3135/3303/972/6890/3117/3108/3310/3109/3122/2923/3113/3306/4261/920/3127/10437
KEGG_VIRAL_MYOCARDITIS	KEGG_VIRAL_MYOCARDITIS	68	0.465979	1.66562	0.00136591	0.0132277	0.0101402	3389	tags=41%, list=19%, signal=34%	3134/595/3107/857/3105/3106/5880/3115/3123/3133/3119/3135/3689/3117/3108/3383/4627/3109/5881/3122/3113/942/3127/1604/3118/6444/958/3111
KEGG_ECM_RECEPTOR_INTERACTION	KEGG_ECM_RECEPTOR_INTERACTION	84	0.444364	1.67082	0.00150803	0.0138739	0.0106356	3778	tags=48%, list=21%, signal=38%	3914/1292/1291/375790/6382/50509/3675/1293/1289/3678/6385/22801/1281/8516/6383/10319/3913/1277/3909/3918/3672/3693/1311/3381/7450/1278/6696/63923/3679/1301/3673/948/1282/1290/1284/3908/2335/961/3911/1280
KEGG_TYROSINE_METABOLISM	KEGG_TYROSINE_METABOLISM	40	0.530767	1.69225	0.00265262	0.023242	0.0178171	2408	tags=38%, list=13%, signal=33%	4282/221/259307/8639/218/4128/1312/2184/7054/6898/3242/7306/2954/220/51409
KEGG_INTESTINAL_IMMUNE_NETWORK_FOR_IGA_PRODUCTION	KEGG_INTESTINAL_IMMUNE_NETWORK_FOR_IGA_PRODUCTION	46	0.505372	1.6871	0.00313111	0.0261874	0.020075	3389	tags=50%, list=19%, signal=41%	7040/10673/3115/6387/3123/3119/3601/3117/3108/56477/3109/3569/3122/608/4055/2826/3113/942/6370/3127/3118/958/3111
KEGG_ALZHEIMERS_DISEASE	KEGG_ALZHEIMERS_DISEASE	145	0.359834	1.44362	0.00342369	0.0267642	0.0205172	3895	tags=41%, list=21%, signal=33%	51806/1346/348/1537/4311/1345/84701/11261/56901/3553/1351/572/374291/4715/823/10975/4713/5330/1327/7384/5533/170712/6390/4723/4700/7381/1347/1349/1340/4035/29796/55851/4712/1337/5331/25825/7124/355/4728/4716/2905/4724/1020/7386/775/4702/102/4729/810/4726/801/1329/9377/4708/4706/27089/6263/4695/1350/4707
KEGG_CELL_ADHESION_MOLECULES_CAMS	KEGG_CELL_ADHESION_MOLECULES_CAMS	128	0.367571	1.4416	0.00363644	0.0267642	0.0205172	3389	tags=42%, list=19%, signal=35%	9076/6382/3134/3107/7122/3105/3106/3115/3897/90952/5797/3123/3133/9073/3119/57863/1272/4267/6385/83700/3135/3689/5817/8516/6383/3117/3108/3383/5175/3109/947/10686/6404/965/6614/3122/1002/29126/3113/942/9080/920/3127/58494/923/24146/1003/257194/137075/3118/9379/5010/958/3111
KEGG_LEISHMANIA_INFECTION	KEGG_LEISHMANIA_INFECTION	69	0.444898	1.59705	0.00379717	0.0268723	0.0206	3232	tags=42%, list=18%, signal=35%	2353/7040/6300/5600/718/3115/1535/3553/3725/3123/3119/7043/3689/3117/3108/4689/2214/3109/10454/3122/2209/7124/3113/3127/4792/5970/3118/3654/3552
KEGG_GLYCOSAMINOGLYCAN_BIOSYNTHESIS_CHONDROITIN_SULFATE	KEGG_GLYCOSAMINOGLYCAN_BIOSYNTHESIS_CHONDROITIN_SULFATE	22	0.622702	1.75858	0.00496053	0.0338051	0.0259146	3234	tags=50%, list=18%, signal=41%	79586/11285/126792/26229/51363/64131/56548/50515/9469/113189/337876
KEGG_VASCULAR_SMOOTH_MUSCLE_CONTRACTION	KEGG_VASCULAR_SMOOTH_MUSCLE_CONTRACTION	113	0.374417	1.4367	0.00674189	0.0427761	0.0327918	2854	tags=29%, list=16%, signal=25%	51806/10398/10267/59/10268/3779/4638/1909/72/4882/136/2767/5605/10266/5330/5580/94274/5739/196883/108/5592/107/8398/5331/147/5322/185/146/800/4637/115/10335/775
KEGG_NATURAL_KILLER_CELL_MEDIATED_CYTOTOXICITY	KEGG_NATURAL_KILLER_CELL_MEDIATED_CYTOTOXICITY	132	0.346582	1.37408	0.0072618	0.0445391	0.0341432	2272	tags=23%, list=12%, signal=21%	399694/3107/3105/3106/7305/5880/5293/10870/11261/3133/135250/2207/5605/3135/3689/4776/25759/3265/5533/7409/4772/3383/2214/154064/5881/8793/8794/7124/353091/1437/355

## Sheet: Low-risk group KEGG
ID	Description	setSize	enrichmentScore	NES	pvalue	p.adjust	qvalues	rank	leading_edge	core_enrichment
KEGG_CELL_CYCLE	KEGG_CELL_CYCLE	124	-0.555468	-1.92286	5.9386e-07	5.46351e-05	4.18827e-05	3471	tags=51%, list=19%, signal=41%	4174/51434/23594/472/5000/9232/5347/2932/891/1019/4999/7532/4193/85417/898/7465/1875/701/10926/7531/64682/996/11200/1027/27127/1387/1029/8697/9126/8555/4176/4085/4173/993/7029/9700/991/10735/23595/1869/8318/7042/1111/995/5591/890/8317/10971/9134/1017/8243/4998/4172/699/4171/1028/7272/6502/5111/990/4175/1871/3066
KEGG_DNA_REPLICATION	KEGG_DNA_REPLICATION	36	-0.702525	-2.01843	1.09826e-05	0.000328125	0.000251537	2008	tags=72%, list=11%, signal=64%	4174/5985/5983/5422/10535/5424/6119/6117/5558/3978/5427/5426/5982/4176/4173/10714/5981/2237/5557/1763/246243/4172/5984/4171/5111/4175
KEGG_SPLICEOSOME	KEGG_SPLICEOSOME	125	-0.510144	-1.76888	3.9343e-05	0.000786803	0.000603155	5219	tags=60%, list=29%, signal=43%	29896/9128/56259/25804/11017/55119/6628/6631/55696/11157/84950/6428/3312/3304/5356/10291/10772/4670/10465/9416/6431/6632/6434/3190/8449/22985/9775/10594/6629/1665/51645/10262/10285/4686/6426/3178/58517/153527/6432/55110/3183/10713/10946/9343/4116/84991/6427/22916/51691/10189/220988/10915/11325/11338/23658/6635/988/51362/1655/23451/23350/51340/23020/7919/27316/55660/9984/57819/1659/10286/9879/5172…
KEGG_MISMATCH_REPAIR	KEGG_MISMATCH_REPAIR	23	-0.724538	-1.89743	0.000161287	0.00211978	0.001625	1740	tags=57%, list=10%, signal=51%	5424/6119/6117/5395/3978/5982/10714/5981/4436/5984/2956/5111/9156
KEGG_LYSINE_DEGRADATION	KEGG_LYSINE_DEGRADATION	39	-0.583413	-1.6981	0.00363384	0.0267642	0.0205172	4620	tags=56%, list=25%, signal=42%	5351/6839/80854/6419/79813/3033/60496/29072/5352/64324/132949/10157/39/223/55870/9869/8424/501/79723/10919/1962/51166
KEGG_BASE_EXCISION_REPAIR	KEGG_BASE_EXCISION_REPAIR	33	-0.59755	-1.69015	0.00568527	0.0373604	0.0286401	2895	tags=58%, list=16%, signal=49%	27343/143/8930/4595/5423/328/55247/5424/7374/6996/3978/5427/5426/10714/2237/10038/3980/5111/142
